# Supplementary material
Source: publisher figshare collection journal article supplement (https://acs.figshare.com/ndownloader/files/10283091)
Supplement: Supplementary file 1 [file 10283091]

# Organocatalytic Asymmetric Synthesis of $\alpha$ -Oxetanyl and $\alpha$ -AzetidinyI Tertiary Alkyl Fluorides and Chlorides

Ransheng Ding and Christian Wolf\*

Department of Chemistry, Georgetown University, Washington, DC 20057, USA

## Table of Contents

|                                                                                                                             |             |
|-----------------------------------------------------------------------------------------------------------------------------|-------------|
| <b>1. General Information</b>                                                                                               | <b>S2</b>   |
| <b>2. Optimization Studies</b>                                                                                              | <b>S3</b>   |
| <b>3. Synthesis Procedures and Compound Characterization</b>                                                                | <b>S6</b>   |
| <b>3.1. Representative example of the organocatalytic Michael addition (above 1 mmol scale)</b>                             | <b>S6</b>   |
| <b>3.2. Synthesis of catalyst VI</b>                                                                                        | <b>S6</b>   |
| <b>3.3. Synthesis of N-Boc-3-fluorooxindoles</b>                                                                            | <b>S7</b>   |
| <b>3.4. Synthesis of 1-fluoro-2-tetralone</b>                                                                               | <b>S9</b>   |
| <b>3.5. General procedure for the organocatalysis with N-Boc-3-fluorooxindoles</b>                                          | <b>S10</b>  |
| <b>3.6. General procedure for the organocatalysis with N-Boc-3-chlorooxindole</b>                                           | <b>S18</b>  |
| <b>3.7. General procedure for the organocatalysis with 1-fluoro-2-tetralone and ethyl 2-fluoro-3-oxo-3-phenylpropanoate</b> | <b>S20</b>  |
| <b>3.8. Selective Transformations</b>                                                                                       | <b>S23</b>  |
| <b>3.8.1. Oxindole ring methanolysis</b>                                                                                    | <b>S23</b>  |
| <b>3.8.2. Stereoselective cyclopropanation</b>                                                                              | <b>S24</b>  |
| <b>3.8.3. Reductive spiro pyrrolidine synthesis</b>                                                                         | <b>S25</b>  |
| <b>3.8.4. Diastereoselective oxetane ring opening</b>                                                                       | <b>S26</b>  |
| <b>4. <math>^1\text{H}</math>, <math>^{13}\text{C}</math>, <math>^{19}\text{F}</math> NMR Spectra</b>                       | <b>S28</b>  |
| <b>5. Crystallographic Data</b>                                                                                             | <b>S85</b>  |
| <b>6. Determination of the Relative Configuration of Compound 11 and 13</b>                                                 | <b>S87</b>  |
| <b>7. HPLC Chromatograms</b>                                                                                                | <b>S92</b>  |
| <b>8. References</b>                                                                                                        | <b>S115</b> |

## General Information

All commercially available reagents and solvents were used without further purification unless noted otherwise. Methyl *tert*-butyl ether and ethyl acetate were stored over 4Å molecular sieves prior to use. Reaction products were purified by column chromatography on silica gel (particle size 32-63 µm) unless stated otherwise. NMR spectra were obtained at 400 MHz (<sup>1</sup>H NMR), 100 MHz (<sup>13</sup>C NMR), and 376 MHz (<sup>19</sup>F NMR) in CDCl<sub>3</sub>. Chemical shifts are reported in ppm relative to tetramethylsilane. *N*-Boc-3-chlorooxindole,<sup>1</sup> ethyl 2-fluoro-3-oxo-3-phenylpropanoate,<sup>2</sup> nitroalkene **2a**,<sup>3</sup> and **2b**,<sup>4</sup> were synthesized following previously reported procedures. Catalysts **II**,<sup>5</sup> **IV**,<sup>6</sup> **VII**, **VIII**,<sup>7</sup> **IX**, **X**,<sup>8</sup> were prepared as described in the literature. Catalysts **I**, **III** and **V** are commercially available and were used without further purification.

The reaction products were first prepared in racemic form to develop a chiral HPLC method for ee analysis. The isolated asymmetric reaction products were then analyzed accordingly.

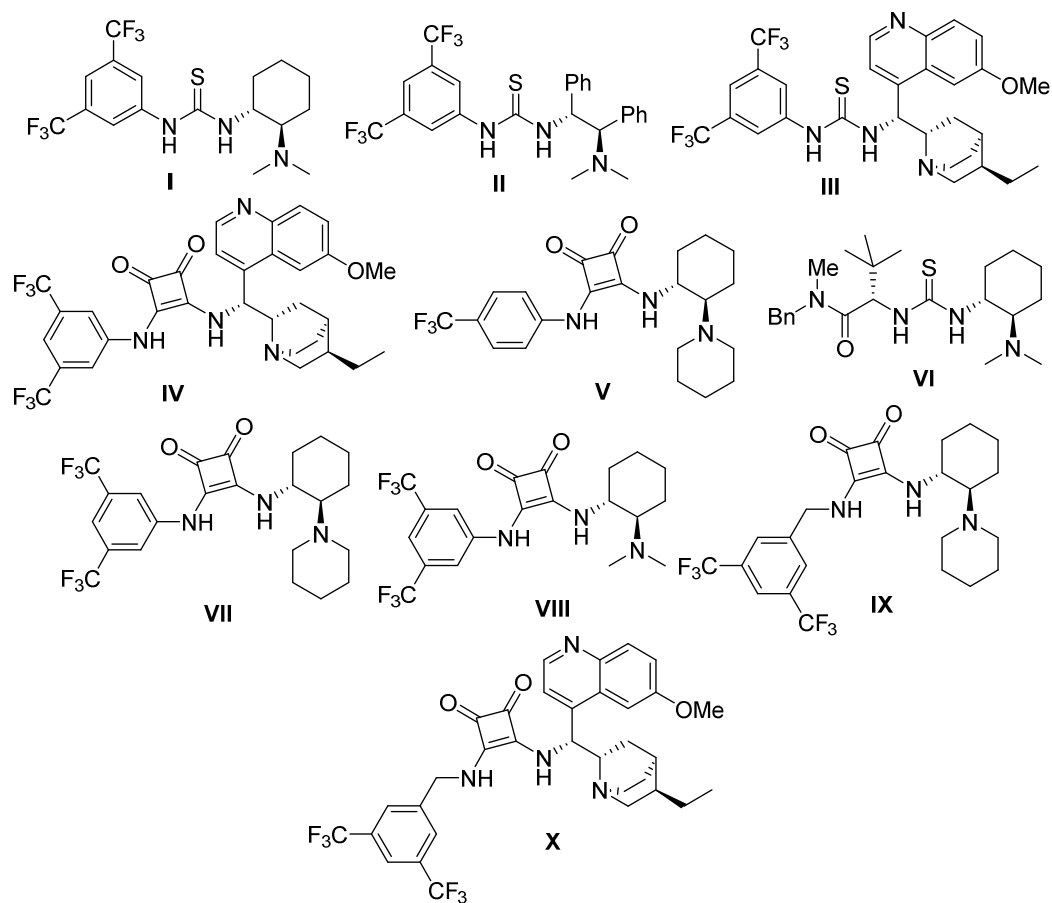

## 1. Optimization Studies

Organocatalysis with *N*-Boc-3-fluorooxindole<sup>a</sup>

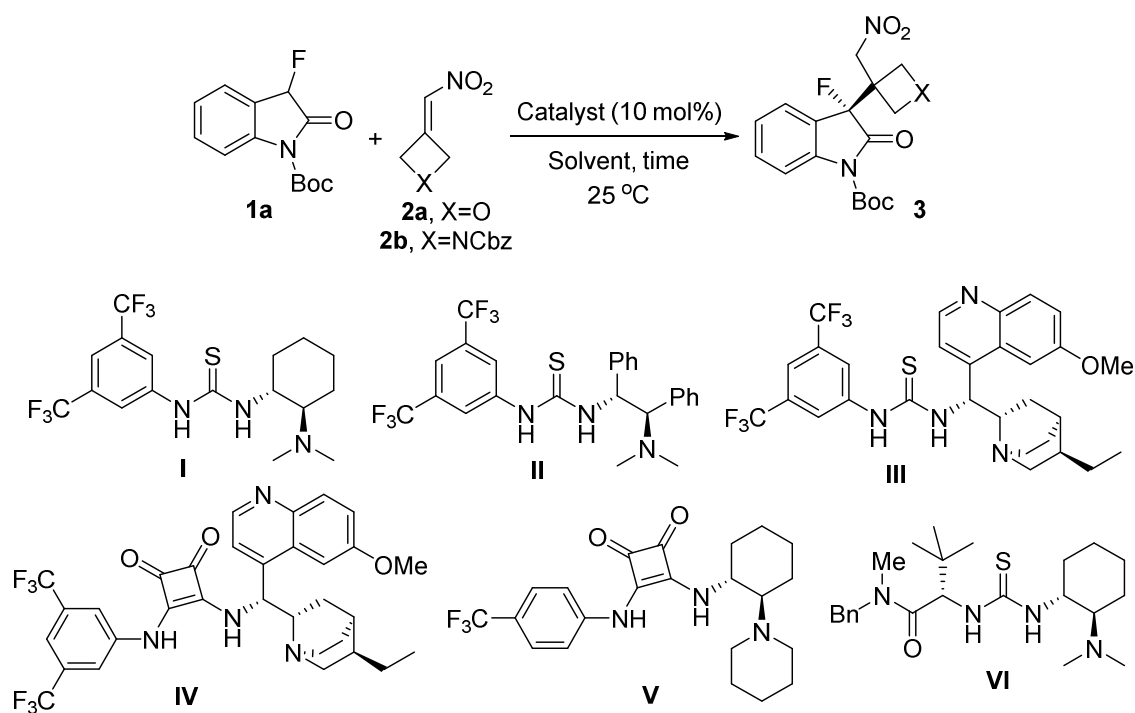

| Entry          | Catalyst   | <b>2</b>  | Time | Solvent | Conversion (%) <sup>b</sup> | ee (%) <sup>c</sup> |
|----------------|------------|-----------|------|---------|-----------------------------|---------------------|
| 1              | <b>I</b>   | <b>2a</b> | 18 h | MTBE    | 100                         | 80                  |
| 2              | <b>II</b>  | <b>2a</b> | 18 h | MTBE    | 100                         | 24                  |
| 3              | <b>III</b> | <b>2a</b> | 18 h | MTBE    | 100                         | 26                  |
| 4              | <b>IV</b>  | <b>2a</b> | 18 h | MTBE    | 100                         | 65                  |
| 5              | <b>V</b>   | <b>2a</b> | 18 h | MTBE    | 73                          | 91                  |
| 6              | <b>VI</b>  | <b>2a</b> | 7 h  | MTBE    | 100                         | 94                  |
| 7              | <b>VI</b>  | <b>2b</b> | 24 h | MTBE    | 64                          | 93                  |
| 8              | <b>V</b>   | <b>2b</b> | 24 h | EtOAc   | 73                          | 92                  |
| 9 <sup>d</sup> | <b>V</b>   | <b>2b</b> | 24 h | EtOAc   | 98                          | 93                  |

[a] Reaction conditions: Michael acceptor **2** (0.15 mmol), organocatalyst (10 mol%), **1a** (1.1 equiv.), solvent (0.45 mL) at 25 °C. [b] Determined by <sup>1</sup>H NMR. [c] Determined by chiral HPLC. [d] 1.4 equivalent of **1a** was used.

Organocatalysis with *N*-Boc-3-chlorooxindole<sup>a</sup>

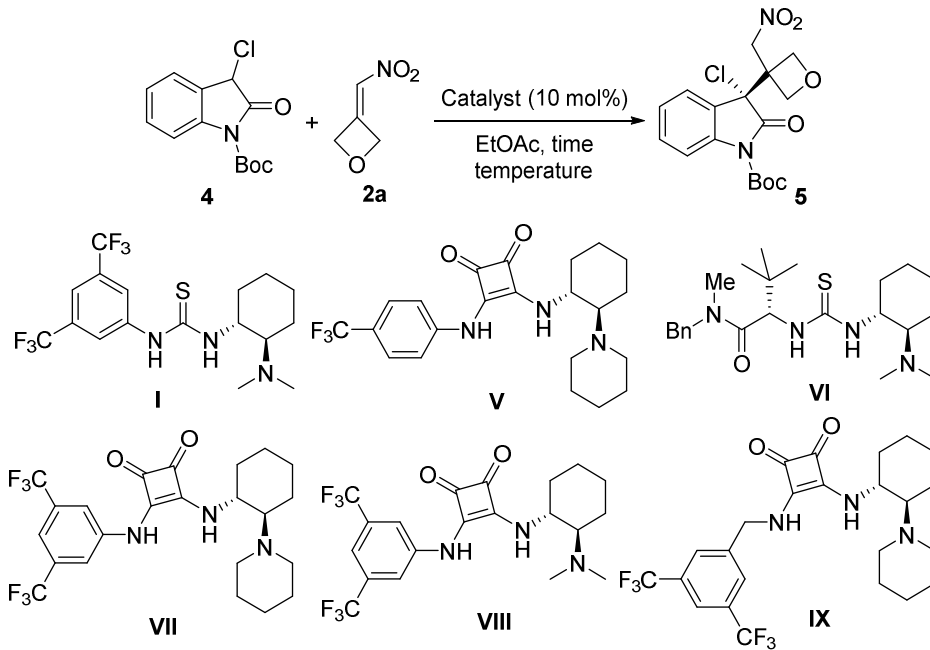

| Entry | Catalyst    | Temperature | Time | Yield (%) <sup>b</sup> | ee (%) <sup>c</sup> |
|-------|-------------|-------------|------|------------------------|---------------------|
| 1     | <b>I</b>    | 25 °C       | 18 h | 81                     | 53                  |
| 2     | <b>V</b>    | 25 °C       | 24 h | 73                     | 63                  |
| 3     | <b>VI</b>   | 25 °C       | 48 h | 48                     | 60                  |
| 4     | <b>V</b>    | -10 °C      | 70 h | 94                     | 72                  |
| 5     | <b>VII</b>  | -15 °C      | 48 h | 52                     | 63                  |
| 6     | <b>VIII</b> | -15 °C      | 48 h | 45                     | 63                  |
| 7     | <b>IX</b>   | -15 °C      | 70 h | 80                     | 90                  |

[a] Reaction conditions: Michael acceptor **2a** (0.15 mmol), organocatalyst (10 mol%), **4** (1.2 equiv.) in ethyl acetate (0.45 mL). [b] Isolated yield. [c] Determined by chiral HPLC.

# Organocatalysis with other fluoroenolates<sup>a</sup>

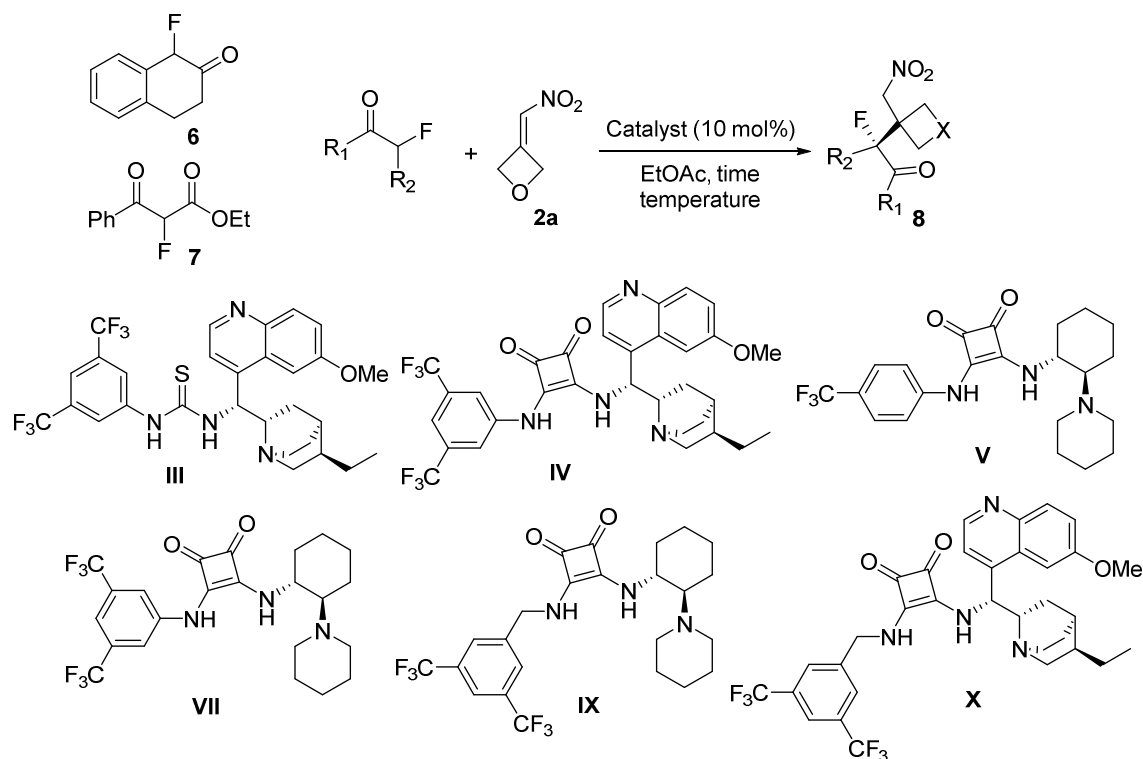

| Entry | Nucleophile | Catalyst   | Temperature | Time  | Yield (%) <sup>b</sup> | ee (%) <sup>c</sup> |
|-------|-------------|------------|-------------|-------|------------------------|---------------------|
| 1     | <b>6</b>    | <b>V</b>   | 25 °C       | 48 h  | 63                     | 82                  |
| 2     | <b>6</b>    | <b>IX</b>  | 25 °C       | 48 h  | 58                     | 83                  |
| 3     | <b>6</b>    | <b>IX</b>  | 0 °C        | 110 h | 84                     | 87                  |
| 4     | <b>7</b>    | <b>III</b> | 25 °C       | 18 h  | 62                     | 38                  |
| 5     | <b>7</b>    | <b>IV</b>  | -15 °C      | 70 h  | 28                     | -37                 |
| 6     | <b>7</b>    | <b>V</b>   | 25 °C       | 18 h  | 24                     | -66                 |
| 7     | <b>7</b>    | <b>VII</b> | 25 °C       | 18 h  | 55                     | -22                 |
| 8     | <b>7</b>    | <b>IX</b>  | 0 °C        | 70 h  | 98                     | 78                  |
| 9     | <b>7</b>    | <b>IX</b>  | -15 °C      | 70 h  | 98                     | 79                  |
| 10    | <b>7</b>    | <b>X</b>   | 0 °C        | 65 h  | 58                     | 60                  |

[a] Reaction conditions: Michael acceptor **2a** (0.15 mmol), organocatalyst (10 mol%), nucleophile **6** or **7** (1.2 equiv.) in ethyl acetate (0.45 mL). [b] Isolated yield. [c] Determined by chiral HPLC. The “-” sign indicates a reversal of the sense of the asymmetric induction as seen by chiral HPLC.

## Synthesis Procedures and Compound Characterization

### 3.1. Representative example of the organocatalytic Michael addition (above 1 mmol scale)

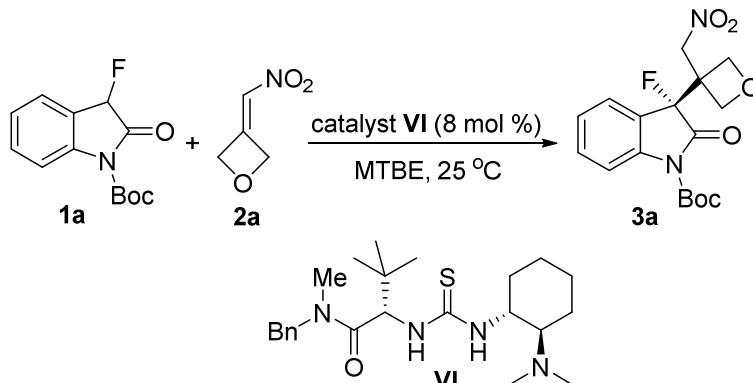

First, *N*-Boc-3-fluorooxindole **1a** (773.9 mg, 3.08 mmol), nitroalkene **2a** (322.2 mg, 2.80 mmol) and catalyst **VI** (92.8 mg, 0.22 mmol) were placed into an oven-dried vial. Then, MTBE (1.25 mL) was added. The vial was then capped and stirred for 22 hours at room temperature. Upon completion, the solvent was evaporated by a gentle flow of nitrogen. The residue was purified by column chromatography (3.5:1 hexanes/ethyl acetate) to give **3a** (873 mg, 2.38 mmol) in 85% yield as a white solid. The ee was determined as 94% using Phenomenex Amylose-1, hexanes/ethanol 90:10, flow rate = 1 mL/min condition.  $t_R(\text{major}) = 10.4$  min,  $t_R(\text{minor}) = 11.5$  min.

### 3.2. Synthesis of catalyst VI

Catalyst **VI** was synthesized following a literature procedure,<sup>9</sup> the last reductive methylation step was modified to improve the yield as described below.

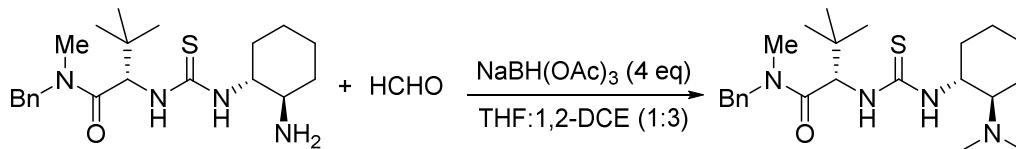

To a solution of (*S*)-2-(3-((1*R*,2*R*)-2-aminocyclohexyl)thioureido)-*N*-benzyl-*N*-3,3-trimethylbutanamide (396 mg, 1.01 mmol) in  $\text{THF}$ :1,2-dichloroethane (1:3, 40 mL) was added formaldehyde (37% aqueous solution, 185.5 mg, 2.32 mmol). The solution was stirred at room temperature for 15 minutes and then cooled to 0 °C. Sodium triacetoxyborohydride (856.3 mg, 4.04 mmol) was added in one portion. The reaction mixture was allowed to warm to room temperature and stirred for 18 hours. A saturated aqueous solution of sodium bicarbonate (10 mL) was added to quench the reaction. The mixture was poured onto brine (60 mL) and extracted with dichloromethane (15 mL, 3 times). The organic layers were

combined, dried over anhydrous Na<sub>2</sub>SO<sub>4</sub>, filtrated, and concentrated under reduced pressure. The residue was purified by flash chromatography using 4% – 12% MeOH/dichloromethane as mobile phase to give catalyst **VI** (356.9 mg, 0.85 mmol) in 84% yield as an off-white amorphous solid. This compound exists as a 4:1 mixture of rotamers. <sup>1</sup>H NMR (400 MHz, CDCl<sub>3</sub>, major rotamer)  $\delta$  = 1.06 (s, 9H), 1.14 – 1.38 (m, 4H), 1.67 – 1.77 (m, 1H), 1.81 (d,  $J$  = 8.3 Hz, 1H), 1.84 – 1.91 (m, 1H), 2.28 (s, 6H), 2.37 – 2.56 (m, 2H), 3.17 (s, 3H), 3.44 – 3.68 (m, 1H), 4.39 (d,  $J$  = 14.6 Hz, 1H), 4.79 (d,  $J$  = 14.6 Hz, 1H), 5.55 (d,  $J$  = 9.2 Hz, 1H), 6.88 (br, 1H), 7.08 (br, 1H), 7.27 – 7.36 (m, 5H). <sup>13</sup>C NMR (100 MHz, CDCl<sub>3</sub>, major rotamer)  $\delta$  = 22.1, 24.7, 25.1, 27.0, 33.2, 36.2, 36.3, 40.2, 51.4, 54.5, 55.6, 60.6, 66.9, 127.5, 128.3, 128.7, 137.1, 172.4, 182.9. Anal. Calcd. for C<sub>23</sub>H<sub>38</sub>N<sub>4</sub>OS: C, 65.99; H, 9.15; N, 13.38. Found: C, 65.87; H, 9.17; N, 13.36.

### 3.3. Synthesis of *N*-Boc-3-fluorooxindoles

*N*-Boc-3-fluorooxindoles **1a** – **1j** were prepared via a two-step synthesis from 2-oxindoles following a literature procedure.<sup>10</sup> Compounds **1e**, **1g**, **1h**, **1i** are new and fully characterized.

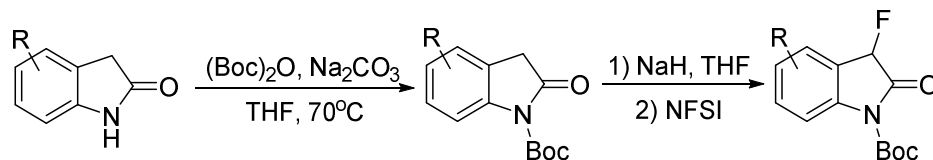

*N*-Boc-3,5-difluorooxindole (**1e**)

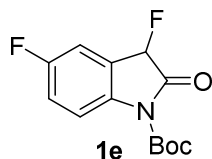

Compound **1e** was synthesized from 5-fluoro-2-oxindole in 44% overall yield as a white solid. <sup>1</sup>H NMR (400 MHz, CDCl<sub>3</sub>)  $\delta$  = 1.63 (s, 9H), 5.69 (d,  $J$  = 50.8 Hz, 1H), 7.15 (ddd,  $J$  = 9.0, 8.3, 2.8 Hz, 1H), 7.22 (dd,  $J$  = 7.7, 2.0 Hz, 1H), 7.89 (dd,  $J$  = 9.1, 4.5 Hz, 1H). <sup>13</sup>C NMR (100 MHz, CDCl<sub>3</sub>)  $\delta$  = 28.2, 84.8 (dd,  $J_{C-F}$  = 191.0, 1.7 Hz), 85.4, 113.5 (dd,  $J_{C-F}$  = 24.8, 1.1 Hz), 117.3 (dd,  $J_{C-F}$  = 7.6, 1.5 Hz), 118.5 (dd,  $J_{C-F}$  = 22.9, 3.2 Hz), 123.4 (dd,  $J_{C-F}$  = 16.5, 8.3 Hz), 137.0 (dd,  $J_{C-F}$  = 5.0, 2.8 Hz), 148.7, 160.1 (dd,  $J_{C-F}$  = 245.7, 3.3 Hz), 168.5 (d,  $J_{C-F}$  = 17.8 Hz). <sup>19</sup>F NMR (376 MHz, CDCl<sub>3</sub>)  $\delta$  = -188.3 (d,  $J$  = 50.9 Hz, 1F), -116.6 (m, 1F). Anal. Calcd. for C<sub>13</sub>H<sub>13</sub>F<sub>2</sub>NO<sub>3</sub>: C, 57.99; H, 4.87; N, 5.20. Found: C, 57.88; H, 5.21; N, 5.60.

Methyl *N*-Boc-3-fluorooxindole-6-carboxylate (**1g**)

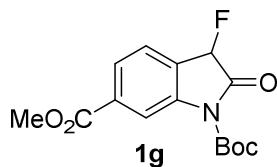

Compound **1g** was synthesized from methyl 2-oxindole-6-carboxylate in 38% overall yield as a white solid.  $^1\text{H}$  NMR (400 MHz,  $\text{CDCl}_3$ )  $\delta$  = 1.66 (s, 9H), 3.95 (s, 3H), 5.75 (d,  $J$  = 50.5 Hz, 1H), 7.58 (dd,  $J$  = 7.8, 1.7 Hz, 1H), 7.95 (d,  $J$  = 7.8 Hz, 1H), 8.53 (d,  $J$  = 1.5 Hz, 1H).  $^{13}\text{C}$  NMR (100 MHz,  $\text{CDCl}_3$ )  $\delta$  = 28.2, 52.7, 84.7 (d,  $J_{\text{C-F}}$  = 191.1 Hz), 85.7, 116.7 (d,  $J_{\text{C-F}}$  = 1.3 Hz), 126.0, 126.1 (d,  $J_{\text{C-F}}$  = 16.2 Hz), 126.6 (d,  $J_{\text{C-F}}$  = 2.7 Hz), 133.6 (d,  $J_{\text{C-F}}$  = 3.2 Hz), 141.1 (d,  $J_{\text{C-F}}$  = 4.8 Hz), 148.4, 166.1 (d,  $J_{\text{C-F}}$  = 1.3 Hz), 168.6 (d,  $J_{\text{C-F}}$  = 17.9 Hz).  $^{19}\text{F}$  NMR (376 MHz,  $\text{CDCl}_3$ )  $\delta$  = -189.8 (d,  $J$  = 50.5 Hz, 1F). Anal. Calcd. for  $\text{C}_{15}\text{H}_{16}\text{FNO}_5$ : C, 58.25; H, 5.21; N, 4.53. Found: C, 58.60; H, 5.48; N, 4.33.

*N*-Boc-3-fluoro-6-trifluoromethyl-2-oxindole (**1h**)

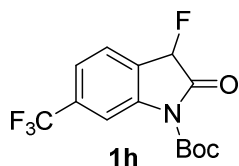

Compound **1h** was synthesized from 6-trifluoromethyl-2-oxindole in 44% overall yield as a white solid.  $^1\text{H}$  NMR (400 MHz,  $\text{CDCl}_3$ )  $\delta$  = 1.65 (s, 9H), 5.76 (d,  $J$  = 50.6 Hz, 1H), 7.53 (dd,  $J$  = 8.2, 1.7 Hz, 1H), 7.63 (d,  $J$  = 8.0 Hz, 1H), 8.22 (d,  $J$  = 1.5 Hz, 1H).  $^{13}\text{C}$  NMR (100 MHz,  $\text{CDCl}_3$ )  $\delta$  = 28.1, 84.5 (d,  $J_{\text{C-F}}$  = 191.5 Hz), 86.0, 113.2 (qd,  $J_{\text{C-F}}$  = 3.9, 1.0 Hz), 122.2 (qd,  $J_{\text{C-F}}$  = 3.7, 3.4 Hz), 124.9 (d,  $J_{\text{C-F}}$  = 1.2 Hz), 125.3 (dq,  $J_{\text{C-F}}$  = 16.3, 1.3 Hz), 126.4, 134.0 (qd,  $J_{\text{C-F}}$  = 32.7, 3.1 Hz), 141.5 (d,  $J_{\text{C-F}}$  = 4.8 Hz), 148.5, 168.2 (d,  $J_{\text{C-F}}$  = 17.9 Hz).  $^{19}\text{F}$  NMR (376 MHz,  $\text{CDCl}_3$ )  $\delta$  = -189.9 (d,  $J$  = 50.6 Hz, 1F), -63.0 (s, 3F). Anal. Calcd. for  $\text{C}_{14}\text{H}_{13}\text{F}_4\text{NO}_3$ : C, 52.67; H, 4.10; N, 4.39. Found: C, 52.48; H, 3.76; N, 4.54.

*N*-Boc-3-fluoro-5-nitro-2-oxindole (**1i**)

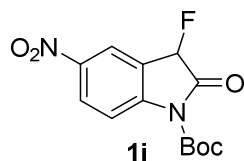

Compound **1i** was synthesized from 5-nitro-2-oxindole in 34% overall yield as a pale-yellow solid.  $^1\text{H}$  NMR (400 MHz,  $\text{CDCl}_3$ )  $\delta$  = 1.65 (s, 9H), 5.79 (d,  $J$  = 50.7 Hz, 1H), 8.11 (d,  $J$  = 8.6, 1.3 Hz, 1H), 8.34 – 8.41 (m, 2H).  $^{13}\text{C}$  NMR (100 MHz,  $\text{CDCl}_3$ )  $\delta$  = 28.1, 84.0 (d,  $J_{\text{C-F}}$  = 192.9 Hz), 86.6, 116.2 (d,  $J_{\text{C-F}}$  = 1.2 Hz), 121.8, 122.8 (d,  $J_{\text{C-F}}$  = 16.7 Hz), 127.9 (d,  $J_{\text{C-F}}$  = 2.7 Hz),



145.0 (d,  $J_{\text{C-F}} = 3.0$  Hz), 146.0 (d,  $J_{\text{C-F}} = 4.3$  Hz), 148.3, 167.8 (d,  $J_{\text{C-F}} = 17.9$  Hz).  $^{19}\text{F}$  NMR (376 MHz,  $\text{CDCl}_3$ )  $\delta = -189.4$  (d,  $J = 50.6$  Hz, 1F). Anal. Calcd. for  $\text{C}_{13}\text{H}_{13}\text{FN}_2\text{O}_5$ : C, 52.71; H, 4.42; N, 9.46. Found: C, 53.04; H, 4.79; N, 9.25.

### 3.4. Synthesis of 1-fluoro-2-tetralone

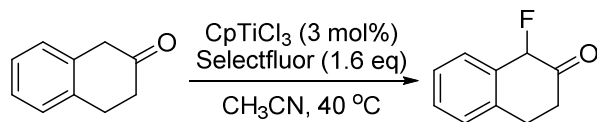

To a solution of  $\beta$ -tetralone (219.3 mg, 1.50 mmol) and selectfluor (850.2 mg, 2.40 mmol) in anhydrous acetonitrile (10 mL) was added cyclopentadienyltitanium(IV) trichloride (9.8 mg, 0.05 mmol). The reaction mixture was heated to 40 °C and stirred for 18 hours. Upon completion, the mixture was poured onto brine (40 mL) and extracted with ethyl acetate (8 mL, 3 times). The organic layers were combined, dried over anhydrous  $\text{MgSO}_4$ , filtrated, and concentrated under reduced pressure. The residue was purified by flash chromatography system using 1 – 8% ethyl acetate-hexanes to afford 1-fluoro-2-tetralone (135.6 mg, 0.83 mmol) in 55% yield as an amber oil. This compound slowly decomposes at room temperature and should be stored under -20 °C.  $^1\text{H}$  NMR (400 MHz,  $\text{CDCl}_3$ )  $\delta = 2.58$  (m, 1H), 2.76 (m, 1H), 3.11 – 3.17 (m, 2H), 5.83 (d,  $J = 49.0$  Hz, 1H), 7.25 (dd,  $J = 5.9, 2.4$  Hz, 1H), 7.31 – 7.38 (m, 2H), 7.50 (dd,  $J = 6.2, 3.9$  Hz, 1H).  $^{13}\text{C}$  NMR (100 MHz,  $\text{CDCl}_3$ )  $\delta = 27.1, 34.6, 90.8$  (d,  $J = 190.5$  Hz), 125.1 (d,  $J = 8.0$  Hz), 127.3, 127.4, 128.8 (d,  $J = 1.8$  Hz), 132.4 (d,  $J = 18.4$  Hz), 135.5 (d,  $J = 5.1$  Hz), 203.7 (d,  $J = 13.7$  Hz).  $^{19}\text{F}$  NMR (376 MHz,  $\text{CDCl}_3$ )  $\delta = -197.4$  (d,  $J = 49.0$  Hz). Anal. Calcd. for  $\text{C}_{10}\text{H}_9\text{FO}$ : C, 73.16; H, 5.53; N, 0. Found: C, 73.36; H, 5.40; N, 0.14.

### 3.5. General procedure for the organocatalysis with *N*-Boc-3-fluorooxindoles

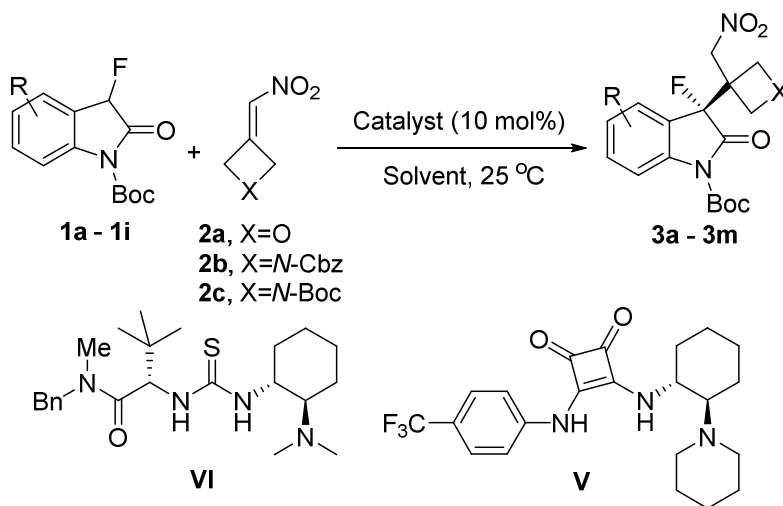

First, *N*-Boc-3-fluorooxindole **1** (0.165 mmol for nitroalkene **2a**, 0.210 mmol for nitroalkene **2b** or **2c**), nitroalkene (0.150 mmol) and organocatalyst (0.015 mmol, cat. **VI** for nitroalkene **2a**, cat. **V** for nitroalkene **2b** or **2c**) were placed into an oven-dried vial. Then, the solvent (0.45 mL, MTBE for nitroalkene **2a**, ethyl acetate for nitroalkene **2b** or **2c**) was added. The vial was then capped and stirred for 6 hours (nitroalkene **2a**) or 24 hours (nitroalkene **2b** or **2c**). Upon completion, the solvent was evaporated by a gentle flow of nitrogen and the residue was purified by column chromatography as described below. Racemic reaction products for HPLC analysis were obtained by applying racemic catalyst **I** in the above procedure.

*N*-Boc-(*R*)-3-fluoro-3-(3-(nitromethyl)oxetan-3-yl)-2-oxoindole (**3a**)

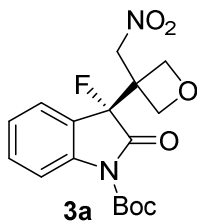

Compound **3a** was obtained from *N*-Boc-3-fluorooxindole **1a** (41.5 mg, 0.165 mmol) and nitroalkene **2a** (17.3 mg, 0.150 mmol) using catalyst **VI** (6.3 mg, 0.015 mmol) by following the procedure described above. Chromatography (3.5:1 hexanes/ethyl acetate) gave 49.7 mg (0.136 mmol, 90%) of a white solid. Mp 82.5-84.4 °C. <sup>1</sup>H NMR (400 MHz, CDCl<sub>3</sub>) δ = 1.63 (s, 9H), 4.63 (dd, *J* = 7.4, 3.0 Hz, 1H), 4.70 (s, 2H), 4.84 (dd, *J* = 6.7, 3.5 Hz, 1H), 5.31 (dd, *J* = 6.8, 1.7 Hz, 1H), 5.57 (dd, *J* = 7.4, 1.8 Hz, 1H), 7.18 – 7.25 (m, 2H), 7.46 – 7.55 (m, 1H), 7.95 (dd, *J* = 8.3, 1.3 Hz, 1H). <sup>13</sup>C NMR (100 MHz, CDCl<sub>3</sub>) δ = 28.1, 48.2 (d, *J*<sub>C-F</sub> = 30.0 Hz), 73.2 (d, *J*<sub>C-F</sub> = 4.6 Hz), 73.8 (d, *J*<sub>C-F</sub> = 4.2 Hz), 76.7 (d, *J*<sub>C-F</sub> = 4.4 Hz), 85.8, 90.5 (d, *J*<sub>C-F</sub> = 191.0 Hz), 116.4 (d, *J*<sub>C-F</sub> = 1.6 Hz), 121.0 (d, *J*<sub>C-F</sub> = 19.2 Hz), 124.9 (d, *J*<sub>C-F</sub> = 1.3 Hz), 125.5

(d,  $J_{C-F}$  = 2.9 Hz), 133.1 (d,  $J_{C-F}$  = 3.4 Hz), 141.3 (d,  $J_{C-F}$  = 5.4 Hz), 148.3, 168.7 (d,  $J_{C-F}$  = 21.9 Hz).  $^{19}\text{F}$  NMR (376 MHz,  $\text{CDCl}_3$ )  $\delta$  = -150.6. The ee was determined as 94% using Phenomenex Amylose-1, hexanes/ethanol 90:10, flow rate = 1mL/min condition.  $t_{\text{R}}(\text{major})$  = 9.1 min,  $t_{\text{R}}(\text{minor})$  = 19.0 min. Anal. Calcd. for  $\text{C}_{17}\text{H}_{19}\text{FN}_2\text{O}_6$ : C, 55.74; H, 5.23; N, 7.65. Found: C, 55.65; H, 5.50; N, 7.57.

*N*-Boc-(*S*)-3-fluoro-3-(*N*-Cbz-3-(nitromethyl)azetidin-3-yl)-2-oxoindole (**3b**)

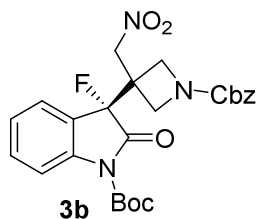

Compound **3b** was obtained from *N*-Boc-3-fluorooxindole **1a** (52.8 mg, 0.210 mmol) and nitroalkene **2b** (37.3 mg, 0.150 mmol) using catalyst **V** (6.3 mg, 0.015 mmol) by following the procedure described above. Chromatography (3.5:1 hexanes/ethyl acetate) gave 69.0 mg (0.138 mmol, 93%) of a white amorphous solid.  $^1\text{H}$  NMR (400 MHz,  $\text{CDCl}_3$ )  $\delta$  = 1.63 (s, 9H), 4.08 (d,  $J$  = 9.7 Hz, 1H), 4.27 (d,  $J$  = 6.4 Hz, 1H), 4.46 – 4.61 (m, 2H), 4.64 (d,  $J$  = 9.0 Hz, 1H), 4.97 (d,  $J$  = 9.8 Hz, 1H), 5.12 (s, 2H), 7.21 (ddd,  $J$  = 7.6, 7.5, 1.4 Hz, 1H), 7.28 (dd,  $J$  = 7.8, 1.9 Hz, 1H), 7.31 – 7.41 (m, 5H), 7.51 (ddd,  $J$  = 7.9, 7.9 1.7 Hz, 1H), 7.95 (dd,  $J$  = 8.1, 1.5 Hz, 1H).  $^{13}\text{C}$  NMR (100 MHz,  $\text{CDCl}_3$ )  $\delta$  = 28.1, 42.8 (d,  $J_{C-F}$  = 30.2 Hz), 52.6, 52.8, 67.4, 76.5, 85.9, 90.5 (d,  $J_{C-F}$  = 192.0 Hz), 116.5, 120.9 (d,  $J_{C-F}$  = 19.0 Hz), 124.8, 125.6 (d,  $J_{C-F}$  = 2.9 Hz), 128.2, 128.4, 128.7, 133.2 (d,  $J_{C-F}$  = 3.2 Hz), 136.2, 141.3 (d,  $J_{C-F}$  = 5.5 Hz), 148.3, 156.4, 168.5 (d,  $J_{C-F}$  = 21.8 Hz).  $^{19}\text{F}$  NMR (376 MHz,  $\text{CDCl}_3$ )  $\delta$  = -152.8, -152.1. The ee was determined as 92% using Phenomenex Amylose-1, hexanes/ethanol 90:10, flow rate = 1mL/min condition.  $t_{\text{R}}(\text{major})$  = 17.4 min,  $t_{\text{R}}(\text{minor})$  = 27.2 min. Anal. Calcd. for  $\text{C}_{25}\text{H}_{26}\text{FN}_3\text{O}_7$ : C, 60.12; H, 5.25; N, 8.41. Found: C, 59.91; H, 5.35; N, 8.66.

*N*-Boc-(*R*)-6-chloro-3-fluoro-3-(3-(nitromethyl)oxetan-3-yl)-2-oxoindole (**3c**)

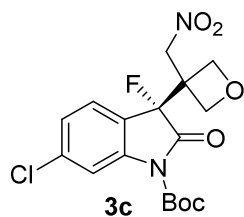

Compound **3c** was obtained from *N*-Boc-3-fluoro-6-chloro-2-oxoindole **1c** (47.1 mg, 0.165 mmol) and nitroalkene **2a** (17.3 mg, 0.150 mmol) using catalyst **VI** (6.3 mg, 0.015 mmol) by following the procedure described above. Chromatography (3.5:1 hexanes/ethyl acetate) gave 56.5 mg (0.141 mmol, 94%) of a white solid. Mp 130.8-131.7 °C.  $^1\text{H}$  NMR (400 MHz,

CDCl<sub>3</sub>)  $\delta$  = 1.63 (s, 9H), 4.61 (dd,  $J$  = 7.4, 3.0 Hz, 1H), 4.74 (s, 2H), 4.82 (dd,  $J$  = 6.7, 3.5 Hz, 1H), 5.24 (dd,  $J$  = 6.8, 1.4 Hz, 1H), 5.53 (dd,  $J$  = 7.5, 1.8 Hz, 1H), 7.15 (dd,  $J$  = 8.1, 2.2 Hz, 1H), 7.21 (d,  $J$  = 8.1 Hz, 1H), 8.04 (d,  $J$  = 1.7 Hz, 1H). <sup>13</sup>C NMR (100 MHz, CDCl<sub>3</sub>)  $\delta$  = 28.1, 48.0 (d,  $J_{C-F}$  = 30.0 Hz), 73.1 (d,  $J_{C-F}$  = 4.6 Hz), 73.8 (d,  $J_{C-F}$  = 4.3 Hz), 76.7 (d,  $J_{C-F}$  = 4.3 Hz), 86.4 (d,  $J_{C-F}$  = 2.1 Hz), 90.2 (d,  $J_{C-F}$  = 191.1 Hz), 117.3 (d,  $J_{C-F}$  = 1.6 Hz), 119.3 (d,  $J_{C-F}$  = 19.3 Hz), 125.7 (d,  $J_{C-F}$  = 3.0 Hz), 125.8 (d,  $J_{C-F}$  = 1.3 Hz), 139.3 (d,  $J_{C-F}$  = 3.9 Hz), 142.3 (d,  $J_{C-F}$  = 5.4 Hz), 148.1, 168.3 (d,  $J_{C-F}$  = 22.1 Hz). <sup>19</sup>F NMR (376 MHz, CDCl<sub>3</sub>)  $\delta$  = -149.8. The ee was determined as 90% using Phenomenex Amylose-1, hexanes/ethanol 90:10, flow rate = 1mL/min condition.  $t_R$ (major) = 9.5 min,  $t_R$ (minor) = 22.6 min. Anal. Calcd. for C<sub>17</sub>H<sub>18</sub>ClFN<sub>2</sub>O<sub>6</sub>: C, 50.95; H, 4.53; N, 6.99. Found: C, 50.93; H, 4.55; N, 6.86.

*N*-Boc-(*R*)-7-chloro-3-fluoro-3-(3-(nitromethyl)oxetan-3-yl)-2-oxoindole (**3d**)

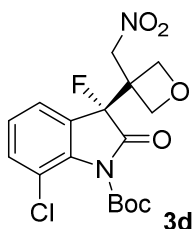

Compound **3d** was obtained from *N*-Boc-3-fluoro-7-chloro-2-oxoindole **1d** (47.4 mg, 0.165 mmol) and nitroalkene **2a** (17.3 mg, 0.150 mmol) using catalyst **VI** (6.3 mg, 0.015 mmol) by following the procedure described above. Chromatography (3.5:1 hexanes/ethyl acetate) gave 53.6 mg (0.134 mmol, 89%) of a white amorphous solid. <sup>1</sup>H NMR (400 MHz, CDCl<sub>3</sub>)  $\delta$  = 1.63 (s, 9H), 4.60 (dd,  $J$  = 7.5, 3.0 Hz, 1H), 4.68 (d,  $J$  = 13.1 Hz, 1H), 4.79 (d,  $J$  = 13.0 Hz, 1H), 4.87 (dd,  $J$  = 6.8, 3.5 Hz, 1H), 5.22 (dd,  $J$  = 6.5, 1.3 Hz, 1H), 5.50 (dd,  $J$  = 7.5, 1.8 Hz, 1H), 7.15 – 7.21 (m, 2H), 7.49 (dd,  $J$  = 5.8, 3.8 Hz, 1H). <sup>13</sup>C NMR (100 MHz, CDCl<sub>3</sub>)  $\delta$  = 27.8, 48.0 (d,  $J_{C-F}$  = 29.4 Hz), 72.9 (d,  $J_{C-F}$  = 4.8 Hz), 73.7 (d,  $J_{C-F}$  = 4.4 Hz), 76.3 (d,  $J_{C-F}$  = 4.4 Hz), 86.9, 91.1 (d,  $J_{C-F}$  = 194.3 Hz), 120.4 (d,  $J_{C-F}$  = 1.4 Hz), 123.6 (d,  $J_{C-F}$  = 1.3 Hz), 124.3 (d,  $J_{C-F}$  = 19.7 Hz), 126.3 (d,  $J_{C-F}$  = 2.8 Hz), 134.6 (d,  $J_{C-F}$  = 3.2 Hz), 138.4 (d,  $J_{C-F}$  = 5.7 Hz), 146.6, 169.1 (d,  $J_{C-F}$  = 22.0 Hz). <sup>19</sup>F NMR (376 MHz, CDCl<sub>3</sub>)  $\delta$  = -153.6. The ee was determined as 94% using Phenomenex Amylose-1, hexanes/ethanol 90:10, flow rate = 1mL/min condition.  $t_R$ (major) = 10.9 min,  $t_R$ (minor) = 31.8 min. Anal. Calcd. for C<sub>17</sub>H<sub>18</sub>ClFN<sub>2</sub>O<sub>6</sub>: C, 50.95; H, 4.53; N, 6.99. Found: C, 50.87; H, 4.91; N, 6.83.

*N*-Boc-(*R*)-3,5-difluoro-3-(3-(nitromethyl)oxetan-3-yl)-2-oxoindole (**3e**)

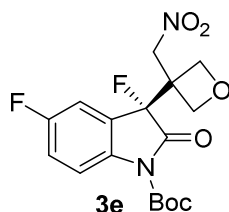

Compound **3e** was obtained from *N*-Boc-3,5-difluorooxindole **1e** (44.4 mg, 0.165 mmol) and nitroalkene **2a** (17.3 mg, 0.150 mmol) using catalyst **VI** (6.3 mg, 0.015 mmol) by following the procedure described above. Chromatography (3.5:1 hexanes/ethyl acetate) gave 52.4 mg (0.136 mmol, 91%) of a white amorphous solid.  $^1\text{H}$  NMR (400 MHz,  $\text{CDCl}_3$ )  $\delta$  = 1.63 (s, 9H), 4.62 (dd,  $J$  = 7.5, 3.1 Hz, 1H), 4.74 (s, 2H), 4.83 (dd,  $J$  = 6.7, 3.6 Hz, 1H), 5.24 (dd,  $J$  = 6.8, 1.4 Hz, 1H), 5.54 (dd,  $J$  = 7.5, 1.9 Hz, 1H), 6.95 (dd,  $J$  = 7.1, 2.6, 2.4 Hz, 1H), 7.22 (m, 1H), 7.97 (ddd,  $J$  = 9.1, 4.5, 1.3 Hz, 1H).  $^{13}\text{C}$  NMR (100 MHz,  $\text{CDCl}_3$ )  $\delta$  = 28.1, 48.0 (d,  $J_{\text{C-F}}$  = 29.7 Hz), 73.0 (d,  $J_{\text{C-F}}$  = 4.6 Hz), 73.7 (d,  $J_{\text{C-F}}$  = 4.4 Hz), 76.6 (d,  $J_{\text{C-F}}$  = 4.5 Hz), 86.1, 90.3 (dd,  $J_{\text{C-F}}$  = 192.0, 1.6 Hz), 112.4 (d,  $J_{\text{C-F}}$  = 25.0 Hz), 118.1 (dd,  $J_{\text{C-F}}$  = 7.7, 1.5 Hz), 119.9 (dd,  $J_{\text{C-F}}$  = 22.7, 3.2 Hz), 122.4 (dd,  $J_{\text{C-F}}$  = 18.9, 7.8 Hz), 137.3 (dd,  $J_{\text{C-F}}$  = 5.5, 2.8 Hz), 148.3, 160.0 (dd,  $J_{\text{C-F}}$  = 247.4, 3.4 Hz), 168.3 (d,  $J_{\text{C-F}}$  = 21.8 Hz).  $^{19}\text{F}$  NMR (376 MHz,  $\text{CDCl}_3$ )  $\delta$  = -151.4 (s, 1F), -115.2 (m, 1F). The ee was determined as 95% using Phenomenex Amylose-1, hexanes/ethanol 90:10, flow rate = 1mL/min condition.  $t_{\text{R}}$ (major) = 9.4 min,  $t_{\text{R}}$ (minor) = 38.4 min. Anal. Calcd. for  $\text{C}_{17}\text{H}_{18}\text{F}_2\text{N}_2\text{O}_6$ : C, 53.13; H, 4.72; N, 7.29. Found: C, 52.97; H, 5.08; N, 7.20.

*N*-Boc-(*R*)-5-bromo-3-fluoro-3-(3-(nitromethyl)oxetan-3-yl)-2-oxoindole (**3f**)

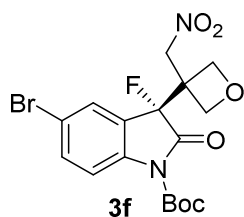

Compound **3f** was obtained from *N*-Boc-3-fluoro-5-bromo-2-oxoindole **1f** (54.5 mg, 0.165 mmol) and nitroalkene **2a** (17.3 mg, 0.150 mmol) using catalyst **VI** (6.3 mg, 0.015 mmol) by following the procedure described above. Chromatography (3.5:1 hexanes/ethyl acetate) gave 61.7 mg (0.139 mmol, 92%) of a white amorphous solid.  $^1\text{H}$  NMR (400 MHz,  $\text{CDCl}_3$ )  $\delta$  = 1.62 (s, 9H), 4.64 (dd,  $J$  = 7.5, 3.0 Hz, 1H), 4.71 (d,  $J$  = 12.9 Hz, 1H), 4.74 – 4.82 (m, 2H), 5.25 (dd,  $J$  = 6.7, 1.3 Hz, 1H), 5.54 (dd,  $J$  = 7.4, 1.9 Hz, 1H), 7.32 (d,  $J$  = 2.1 Hz, 1H), 7.63 (dd,  $J$  = 8.8, 2.1 Hz, 1H), 7.87 (d,  $J$  = 8.8 Hz, 1H).  $^{13}\text{C}$  NMR (100 MHz,  $\text{CDCl}_3$ )  $\delta$  = 28.1, 48.0 (d,  $J_{\text{C-F}}$  = 29.8 Hz), 73.1 (d,  $J_{\text{C-F}}$  = 4.8 Hz), 73.6 (d,  $J_{\text{C-F}}$  = 4.2 Hz), 76.7 (d,  $J_{\text{C-F}}$  = 4.4 Hz), 86.2, 90.2 (d,  $J_{\text{C-F}}$  = 191.9 Hz), 118.1 (d,  $J_{\text{C-F}}$  = 1.5 Hz), 118.4 (d,  $J_{\text{C-F}}$  = 3.5 Hz), 122.9 (d,  $J_{\text{C-F}}$  = 19.0 Hz), 127.8, 136.0 (d,  $J_{\text{C-F}}$  = 3.2 Hz), 140.3 (d,  $J_{\text{C-F}}$  = 5.3 Hz), 148.1, 167.9 (d,  $J_{\text{C-F}}$

= 21.8 Hz).  $^{19}\text{F}$  NMR (376 MHz,  $\text{CDCl}_3$ )  $\delta$  = -151.1. The ee was determined as 95% using Phenomenex Amylose-1, hexanes/ethanol 90:10, flow rate = 1mL/min condition.  $t_{\text{R}}(\text{major})$  = 9.8 min,  $t_{\text{R}}(\text{minor})$  = 33.7 min. Anal. Calcd. for  $\text{C}_{17}\text{H}_{18}\text{BrFN}_2\text{O}_6$ : C, 45.86; H, 4.08; N, 6.29. Found: C, 46.03; H, 4.07; N, 6.20.

Methyl *N*-Boc-(*R*)-3-fluoro-3-(3-(nitromethyl)oxetan-3-yl)-2-oxindole-6-carboxylate (**3g**)

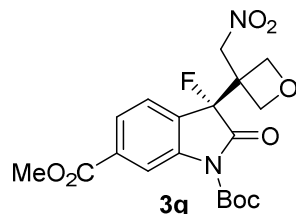

Compound **3g** was obtained from methyl *N*-Boc-3-fluorooxindole-6-carboxylate **1g** (51.1 mg, 0.165 mmol) and nitroalkene **2a** (17.3 mg, 0.150 mmol) using catalyst **VI** (6.3 mg, 0.015 mmol) by following the procedure described above. Chromatography (3.5:1 hexanes/ethyl acetate) gave 54.2 mg (0.128 mmol, 92%) of a white amorphous solid.  $^1\text{H}$  NMR (400 MHz,  $\text{CDCl}_3$ )  $\delta$  = 1.65 (s, 9H), 3.95 (s, 3H), 4.62 (dd,  $J$  = 7.5, 3.1 Hz, 1H), 4.74 (s, 2H), 4.84 (dd,  $J$  = 6.8, 3.6 Hz, 1H), 5.27 (dd,  $J$  = 6.8, 1.4 Hz, 1H), 5.56 (dd,  $J$  = 7.5, 1.9 Hz, 1H), 7.31 (dd,  $J$  = 7.9, 2.2 Hz, 1H), 7.93 (d,  $J$  = 8.0 Hz, 1H), 8.59 (d,  $J$  = 1.9 Hz, 1H).  $^{13}\text{C}$  NMR (100 MHz,  $\text{CDCl}_3$ )  $\delta$  = 28.1, 48.0 (d,  $J_{\text{C-F}}$  = 29.6 Hz), 52.8, 73.1 (d,  $J_{\text{C-F}}$  = 4.6 Hz), 73.8 (d,  $J_{\text{C-F}}$  = 4.4 Hz), 76.6 (d,  $J_{\text{C-F}}$  = 4.4 Hz), 86.4, 90.2 (d,  $J_{\text{C-F}}$  = 191.5 Hz), 117.3 (d,  $J_{\text{C-F}}$  = 1.4 Hz), 124.9 (d,  $J_{\text{C-F}}$  = 1.3 Hz), 125.2 (d,  $J_{\text{C-F}}$  = 18.6 Hz), 126.9 (d,  $J_{\text{C-F}}$  = 2.8 Hz), 134.7 (d,  $J_{\text{C-F}}$  = 3.1 Hz), 141.5 (d,  $J_{\text{C-F}}$  = 5.3 Hz), 148.0, 165.7 (d,  $J_{\text{C-F}}$  = 1.5 Hz), 168.3 (d,  $J_{\text{C-F}}$  = 21.8 Hz).  $^{19}\text{F}$  NMR (376 MHz,  $\text{CDCl}_3$ )  $\delta$  = -152.0. The ee was determined as 94% using Phenomenex Amylose-1, hexanes/ethanol 90:10, flow rate = 1mL/min condition.  $t_{\text{R}}(\text{major})$  = 14.7 min,  $t_{\text{R}}(\text{minor})$  = 23.6 min. Anal. Calcd. for  $\text{C}_{19}\text{H}_{21}\text{FN}_2\text{O}_8$ : C, 53.77; H, 4.99; N, 6.60. Found: C, 54.34; H, 5.19; N, 6.42.

*N*-Boc-(*R*)-6-trifluoromethyl-3-fluoro-3-(3-(nitromethyl)oxetan-3-yl)-2-oxindole (**3h**)

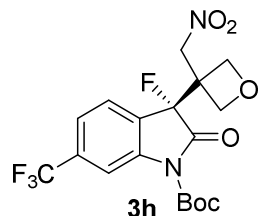

Compound **3h** was obtained from *N*-Boc-3-fluoro-6-trifluoromethyl-2-oxindole **1h** (52.7 mg, 0.165 mmol) and nitroalkene **2a** (17.3 mg, 0.150 mmol) using catalyst **VI** (6.3 mg, 0.015

mmol) by following the procedure described above. Chromatography (3.5:1 hexanes/ethyl acetate) gave 63.4 mg (0.146 mmol, 97%) of a white amorphous solid.

$^1\text{H}$  NMR (400 MHz,  $\text{CDCl}_3$ )  $\delta$  = 1.64 (s, 9H), 4.64 (dd,  $J$  = 7.5, 3.0 Hz, 1H), 4.77 (dd,  $J$  = 16.0, 13.4 Hz, 2H), 4.82 (dd,  $J$  = 6.9, 3.7 Hz, 1H), 5.23 (dd,  $J$  = 6.8, 1.8 Hz, 1H), 5.54 (dd,  $J$  = 7.5, 1.8 Hz, 1H), 7.38 (dd,  $J$  = 7.8, 2.0 Hz, 1H), 7.51 (d,  $J$  = 7.8 Hz, 1H), 8.28 (d,  $J$  = 1.5 Hz, 1H).  $^{13}\text{C}$  NMR (100 MHz,  $\text{CDCl}_3$ )  $\delta$  = 28.1, 48.0 (d,  $J_{\text{C-F}}$  = 29.5 Hz), 73.1 (d,  $J_{\text{C-F}}$  = 4.8 Hz), 73.7 (d,  $J_{\text{C-F}}$  = 4.7 Hz), 76.6 (d,  $J_{\text{C-F}}$  = 4.3 Hz), 86.7, 90.1 (d,  $J_{\text{C-F}}$  = 191.6 Hz), 113.8 (qd,  $J_{\text{C-F}}$  = 3.8, 1.2 Hz), 122.4 (qd,  $J_{\text{C-F}}$  = 3.9, 3.3 Hz), 123.2 (qd,  $J_{\text{C-F}}$  = 255.2, 1.1 Hz), 125.4 (d,  $J_{\text{C-F}}$  = 1.0 Hz), 125.6 (qd,  $J_{\text{C-F}}$  = 178.1, 1.0 Hz), 135.1 (qd,  $J_{\text{C-F}}$  = 33.0, 3.1 Hz), 141.9 (d,  $J_{\text{C-F}}$  = 5.3 Hz), 148.0, 168.0 (d,  $J_{\text{C-F}}$  = 21.8 Hz).  $^{19}\text{F}$  NMR (376 MHz,  $\text{CDCl}_3$ )  $\delta$  = -152.1 (s, 1F), -63.2 (s, 3F). The ee was determined as 96% using Phenomenex Amylose-1, hexanes/ethanol 90:10, flow rate = 1mL/min condition.  $t_{\text{R}}(\text{major})$  = 7.2 min,  $t_{\text{R}}(\text{minor})$  = 10.1 min. Anal. Calcd. for  $\text{C}_{18}\text{H}_{18}\text{F}_4\text{N}_2\text{O}_6$ : C, 49.78; H, 4.18; N, 6.45. Found: C, 49.83; H, 4.26; N, 6.37.

*N*-Boc-(*R*)-5-nitro-3-fluoro-3-(3-(nitromethyl)oxetan-3-yl)-2-oxoindole (**3i**)

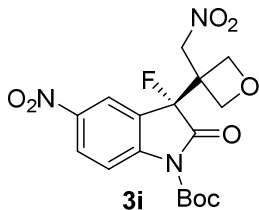

Compound **3i** was obtained from *N*-Boc-3-fluoro-5-nitro-2-oxoindole **1i** (48.9 mg, 0.165 mmol) and nitroalkene **2a** (17.3 mg, 0.150 mmol) using catalyst **VI** (6.3 mg, 0.015 mmol) by following the procedure described above. Chromatography (3.5:1 hexanes/ethyl acetate) gave 53.1 mg (0.129 mmol, 86%) of a white amorphous solid.  $^1\text{H}$  NMR (400 MHz,  $\text{CDCl}_3$ )  $\delta$  = 1.64 (s, 9H), 4.63 (dd,  $J$  = 7.5, 3.1 Hz, 1H), 4.79 (d,  $J$  = 13.2 Hz, 1H), 4.83 – 4.89 (m, 2H), 5.26 (dd,  $J$  = 6.9, 1.4 Hz, 1H), 5.55 (dd,  $J$  = 7.5, 1.9 Hz, 1H), 8.09 (dd,  $J$  = 2.3, 2.3 Hz, 1H), 8.18 (dd,  $J$  = 9.1, 1.2 Hz, 1H), 8.43 (ddd,  $J$  = 9.1, 2.3, 1.6 Hz, 1H).  $^{13}\text{C}$  NMR (100 MHz,  $\text{CDCl}_3$ )  $\delta$  = 28.1, 47.9 (d,  $J_{\text{C-F}}$  = 29.6 Hz), 73.1 (d,  $J_{\text{C-F}}$  = 4.8 Hz), 73.7 (d,  $J_{\text{C-F}}$  = 4.6 Hz), 76.7 (d,  $J_{\text{C-F}}$  = 4.3 Hz), 87.2, 89.8 (d,  $J_{\text{C-F}}$  = 192.2 Hz), 116.8 (d,  $J_{\text{C-F}}$  = 1.3 Hz), 120.6, 122.1 (d,  $J_{\text{C-F}}$  = 19.3 Hz), 128.9 (d,  $J_{\text{C-F}}$  = 2.7 Hz), 145.0 (d,  $J_{\text{C-F}}$  = 3.0 Hz), 146.4 (d,  $J_{\text{C-F}}$  = 4.8 Hz), 147.8, 167.8 (d,  $J_{\text{C-F}}$  = 21.8 Hz).  $^{19}\text{F}$  NMR (376 MHz,  $\text{CDCl}_3$ )  $\delta$  = -151.3. The ee was determined as 93% using CHIRALPAK IA, hexanes/isopropanol 90:10, flow rate = 1mL/min condition.  $t_{\text{R}}(\text{major})$  = 14.8 min,  $t_{\text{R}}(\text{minor})$  = 17.4 min. Anal. Calcd. for  $\text{C}_{17}\text{H}_{18}\text{FN}_3\text{O}_8$ : C, 49.64; H, 4.41; N, 10.22. Found: C, 49.63; H, 4.48; N, 10.32.

*N*-Boc-(*R*)-5-methoxy-3-fluoro-3-(3-(nitromethyl)oxetan-3-yl)-2-oxoindole (**3j**)

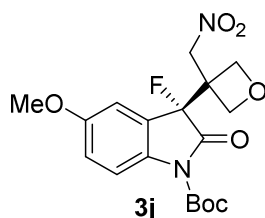

Compound **3j** was obtained from *N*-Boc-3-fluoro-5-methoxy-2-oxoindole **1j** (46.4 mg, 0.165 mmol) and nitroalkene **2a** (17.3 mg, 0.150 mmol) using catalyst **VI** (6.3 mg, 0.015 mmol) by following the procedure described above. Chromatography (3.5:1 hexanes/ethyl acetate) gave 55.3 mg (0.139 mmol, 93%) of a white amorphous solid.  $^1\text{H}$  NMR (400 MHz,  $\text{CDCl}_3$ )  $\delta$  = 1.63 (s, 9H), 3.81 (s, 3H), 4.63 (dd,  $J$  = 7.4, 3.0 Hz, 1H), 4.67 (d,  $J$  = 13.2 Hz, 1H), 4.71 (d,  $J$  = 13.3 Hz, 1H), 4.83 (dd,  $J$  = 6.7, 3.5 Hz, 1H), 5.31 (dd,  $J$  = 6.2, 1.1 Hz, 1H), 5.57 (dd,  $J$  = 7.5, 1.8 Hz, 1H), 6.73 (dd,  $J$  = 2.2, 1.0 Hz, 1H), 7.01 (dd,  $J$  = 9.1, 2.3 Hz, 1H), 7.87 (dd,  $J$  = 9.1, 1.3 Hz, 1H).  $^{13}\text{C}$  NMR (100 MHz,  $\text{CDCl}_3$ )  $\delta$  = 28.2, 48.2 (d,  $J_{\text{C-F}}$  = 29.9 Hz), 56.0, 73.1 (d,  $J_{\text{C-F}}$  = 4.7 Hz), 73.7 (d,  $J_{\text{C-F}}$  = 4.0 Hz), 76.7 (d,  $J_{\text{C-F}}$  = 4.4 Hz), 85.6, 90.6 (d,  $J_{\text{C-F}}$  = 191.7 Hz), 111.2, 117.5, 117.5, 122.0 (d,  $J_{\text{C-F}}$  = 18.7 Hz), 134.3 (d,  $J_{\text{C-F}}$  = 5.4 Hz), 148.4, 157.4 (d,  $J_{\text{C-F}}$  = 3.0 Hz), 168.7 (d,  $J_{\text{C-F}}$  = 21.8 Hz).  $^{19}\text{F}$  NMR (376 MHz,  $\text{CDCl}_3$ )  $\delta$  = -151.3. The ee was determined as 94% using Phenomenex Amylose-1, hexanes/ethanol 90:10, flow rate = 1 mL/min condition.  $t_{\text{R}}(\text{major})$  = 12.0 min,  $t_{\text{R}}(\text{minor})$  = 22.9 min. Anal. Calcd. for  $\text{C}_{18}\text{H}_{21}\text{FN}_2\text{O}_7$ : C, 54.54; H, 5.34; N, 7.07. Found: C, 54.06; H, 5.62; N, 6.80.

*N*-Boc-(*S*)-3-fluoro-3-(*N*-Boc-3-(nitromethyl)azetidin-3-yl)-2-oxoindole (**3k**)

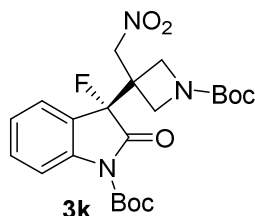

Compound **3k** was obtained from *N*-Boc-3-fluoroindole **1a** (52.8 mg, 0.210 mmol) and nitroalkene **2c** (32.2 mg, 0.150 mmol) using catalyst **V** (6.3 mg, 0.015 mmol) by following the procedure described above. Chromatography (3.5:1 hexanes/ethyl acetate) gave 67.8 mg (0.146 mmol, 97%) of a white solid, Mp 69.2-70.1 °C.  $^1\text{H}$  NMR (400 MHz,  $\text{CDCl}_3$ )  $\delta$  = 1.46 (s, 9H), 1.63 (s, 9H), 3.99 (d,  $J$  = 9.7 Hz, 1H), 4.15 (d,  $J$  = 14.1 Hz, 1H), 4.43 – 4.63 (m, 3H), 4.87 (d,  $J$  = 9.4 Hz, 1H), 7.23 (ddd,  $J$  = 7.6, 7.6, 1.7 Hz, 1H), 7.30 (dd,  $J$  = 7.6, 1.8 Hz, 1H), 7.51 (ddd,  $J$  = 8.2, 7.3, 1.8 Hz, 1H), 7.96 (dd,  $J$  = 8.3, 1.6 Hz, 1H).  $^{13}\text{C}$  NMR (100 MHz,  $\text{CDCl}_3$ )  $\delta$  = 28.1, 28.4, 42.4 (d,  $J_{\text{C-F}}$  = 30.3 Hz), 52.3, 52.7, 77.34 (d,  $J_{\text{C-F}}$  = 5.3 Hz), 80.7, 85.8, 90.5 (d,  $J_{\text{C-F}}$  = 191.2 Hz), 116.4 (d,  $J_{\text{C-F}}$  = 1.5 Hz), 121.0 (d,  $J_{\text{C-F}}$  = 19.0 Hz), 124.8, 125.6 (d,  $J_{\text{C-F}}$  = 2.9 Hz), 133.1 (d,  $J_{\text{C-F}}$  = 3.2 Hz), 141.3 (d,  $J_{\text{C-F}}$  = 5.5 Hz), 148.3, 156.2, 168.6 (d,  $J_{\text{C-F}}$  = 22.0 Hz).  $^{19}\text{F}$  NMR (376 MHz,  $\text{CDCl}_3$ )  $\delta$  = -151.9, -152.8. The ee was determined as 93%



using Phenomenex Amylose-1, hexanes/ethanol 90:10, flow rate = 1mL/min condition.  $t_{\text{R}}(\text{major}) = 6.9$  min,  $t_{\text{R}}(\text{minor}) = 8.8$  min. Anal. Calcd. for  $\text{C}_{22}\text{H}_{28}\text{FN}_3\text{O}_7$ : C, 56.77; H, 6.06; N, 9.03. Found: C, 56.44; H, 6.36; N, 9.04.

*N*-Boc-(*S*)-5-bromo-3-fluoro-3-(*N*-Boc-3-(nitromethyl)azetidin-3-yl)-2-oxoindole (**3l**)

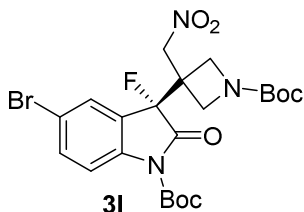

Compound **3l** was obtained from *N*-Boc-3-fluoro-5-bromo-2-oxoindole **1f** (69.3 mg, 0.210 mmol) and nitroalkene **2c** (32.2 mg, 0.150 mmol) using catalyst **V** (6.3 mg, 0.015 mmol) by following the procedure described above. Chromatography (5:1 hexanes/ethyl acetate) gave 75.8 mg (0.139 mmol, 93%) of a white amorphous solid.  $^1\text{H}$  NMR (400 MHz,  $\text{CDCl}_3$ )  $\delta$  = 1.47 (s, 9H), 1.62 (s, 9H), 3.99 (d,  $J = 10.0$  Hz, 1H), 4.12 (d,  $J = 9.0$  Hz, 1H), 4.47 – 4.58 (m, 2H), 4.63 (d,  $J = 12.9$  Hz, 1H), 4.83 (d,  $J = 9.6$  Hz, 1H), 7.40 (d,  $J = 2.0$  Hz, 1H), 7.64 (dd,  $J = 8.8, 2.0$  Hz, 1H), 7.88 (d,  $J = 8.8$  Hz, 1H).  $^{13}\text{C}$  NMR (100 MHz,  $\text{CDCl}_3$ )  $\delta$  = 28.1, 28.5, 42.3 (d,  $J_{\text{C-F}} = 30.1$  Hz), 52.5, 52.6, 77.1, 80.9, 86.2, 90.2 (d,  $J_{\text{C-F}} = 192.3$  Hz), 118.1 (d,  $J_{\text{C-F}} = 1.4$  Hz), 118.4 (d,  $J_{\text{C-F}} = 3.4$  Hz), 123.0 (d,  $J_{\text{C-F}} = 19.0$  Hz), 127.8, 136.1 (d,  $J_{\text{C-F}} = 3.1$  Hz), 140.3 (d,  $J_{\text{C-F}} = 5.4$  Hz), 148.1, 156.1, 167.8 (d,  $J_{\text{C-F}} = 21.8$  Hz).  $^{19}\text{F}$  NMR (376 MHz,  $\text{CDCl}_3$ )  $\delta$  = -152.5, 152.6. The ee was determined as 92% using Phenomenex Amylose-1, hexanes/isopropanol 95:5, flow rate = 1mL/min condition.  $t_{\text{R}}(\text{major}) = 12.4$  min,  $t_{\text{R}}(\text{minor}) = 14.8$  min. Anal. Calcd. for  $\text{C}_{22}\text{H}_{27}\text{BrFN}_3\text{O}_7$ : C, 48.54; H, 5.00; N, 7.72. Found: C, 48.37; H, 5.18; N, 7.47.

Methyl *N*-Boc-(*S*)-3-fluoro-3-(*N*-Cbz-3-(nitromethyl)azetidin-3-yl)-2-oxoindole-6-carboxylate (**3m**)

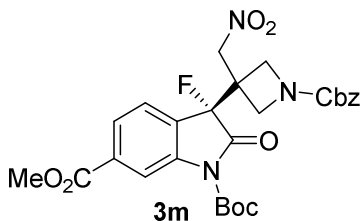

Compound **3m** was obtained from methyl *N*-Boc-3-fluorooxindole-6-carboxylate **1g** (65.0 mg, 0.210 mmol) and nitroalkene **2b** (37.3 mg, 0.150 mmol) using catalyst **V** (6.3 mg, 0.015 mmol) by following the procedure described above. Chromatography (3.5:1 hexanes/ethyl acetate) gave 75.6 mg (0.136 mmol, 90%) of a white solid. Mp 71.2-72.5 °C.  $^1\text{H}$  NMR (400

MHz, CDCl<sub>3</sub>)  $\delta$  = 1.65 (s, 9H), 3.95 (s, 3H), 4.07 (d,  $J$  = 8.4 Hz, 1H), 4.28 (d,  $J$  = 6.8 Hz, 1H), 4.48 – 4.66 (m, 3H), 4.96 (d,  $J$  = 9.3 Hz, 1H), 5.12 (s, 2H), 7.29 – 7.43 (m, 6H), 7.91 (d,  $J$  = 8.1 Hz, 1H), 8.59 (d,  $J$  = 1.3 Hz, 1H). <sup>13</sup>C NMR (100 MHz, CDCl<sub>3</sub>)  $\delta$  = 28.1, 42.7 (d,  $J_{C-F}$  = 29.8 Hz), 52.6, 52.9, 52.9, 67.5, 76.8, 86.4, 90.2 (d,  $J_{C-F}$  = 192.2 Hz), 117.4, 124.8, 125.0 (d,  $J_{C-F}$  = 18.7 Hz), 126.9 (d,  $J_{C-F}$  = 2.7 Hz), 128.3, 128.5, 128.7, 134.8 (d,  $J_{C-F}$  = 3.0 Hz), 136.1, 141.5 (d,  $J_{C-F}$  = 5.4 Hz), 147.9, 156.3, 165.7 (d,  $J_{C-F}$  = 1.7 Hz), 168.1 (d,  $J_{C-F}$  = 21.8 Hz). <sup>19</sup>F NMR (376 MHz, CDCl<sub>3</sub>)  $\delta$  = -153.9, -153.3. The ee was determined as 92% using CHIRALPAK IA, hexanes/isopropanol 90:10, flow rate = 1mL/min condition.  $t_R$ (major) = 21.0 min,  $t_R$ (minor) = 27.0 min. Anal. Calcd. for C<sub>27</sub>H<sub>28</sub>FN<sub>3</sub>O<sub>9</sub>: C, 58.17; H, 5.06; N, 7.54. Found: C, 58.24; H, 5.33; N, 7.39.

### 3.6. General procedure for the organocatalysis with *N*-Boc-3-chlorooxindole

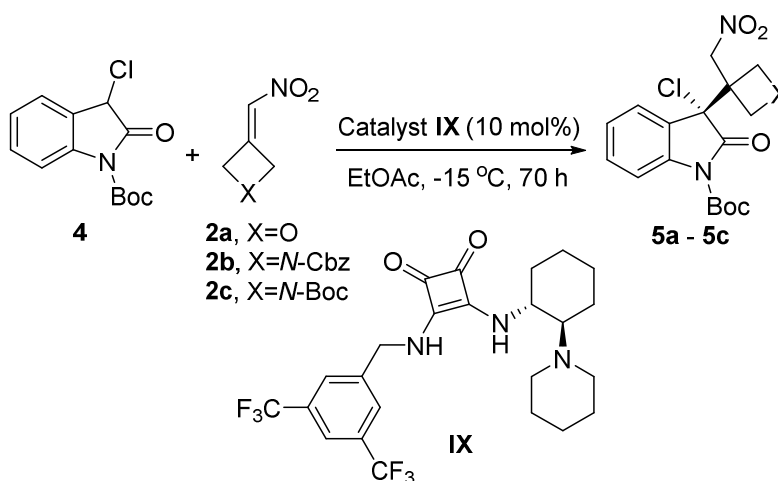

First, *N*-Boc-3-chlorooxindole **4** (48.2 mg, 0.180 mmol), nitroalkene **2** (0.150 mmol) and catalyst **IX** (7.3 mg, 0.015 mmol) were placed into an oven-dried vial. Then, ethyl acetate (0.45 mL) was added to the vial. The vial was then capped, and the solution was cooled to -15 °C and stirred for 70 hours. Upon completion, the solvent was evaporated by a gentle flow of nitrogen and the residue was purified by column chromatography as described below. Racemic reaction products for HPLC analysis were obtained by applying racemic mixture of catalyst **I** in the above procedure at room temperature.

*N*-Boc-(*R*)-3-chloro-3-(3-(nitromethyl)oxetan-3-yl)-2-oxindole (**5a**)

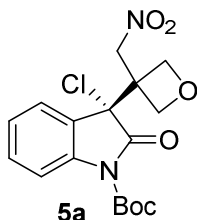

Compound **5a** was obtained from *N*-Boc-3-chlorooxindole **4** (48.2 mg, 0.180 mmol) and nitroalkene **2a** (17.3 mg, 0.150 mmol) by following the procedure described above. Chromatography (6:1:1 hexanes/dichloromethane/ethyl acetate) gave 46.5 mg (0.121 mmol, 81%) of a pink amorphous solid. <sup>1</sup>H NMR (400 MHz, CDCl<sub>3</sub>) δ = 1.64 (s, 9H), 4.64 – 4.70 (m, 2H), 4.72 (d, *J* = 12.5 Hz, 1H), 4.93 (d, *J* = 7.0 Hz, 1H), 5.34 (d, *J* = 7.0 Hz, 1H), 5.56 (d, *J* = 7.7 Hz, 1H), 7.17 – 7.25 (m, 2H), 7.45 (ddd, *J* = 8.6, 6.0, 3.0 Hz, 1H), 7.91 (dd, *J* = 8.3, 1.0 Hz, 1H). <sup>13</sup>C NMR (100 MHz, CDCl<sub>3</sub>) δ = 28.1, 48.8, 66.0, 74.1, 75.6, 76.9, 86.0, 116.2, 124.3, 124.8, 125.7, 132.0, 139.3, 148.3, 169.9. The ee was determined as 90% using Phenomenex Amylose-1, hexanes/isopropanol 95:5, flow rate = 1mL/min condition. *t<sub>R</sub>*(major) = 12.5 min, *t<sub>R</sub>*(minor) = 11.0 min. Anal. Calcd. for C<sub>17</sub>H<sub>19</sub>ClN<sub>2</sub>O<sub>6</sub>: C, 53.34; H, 5.00; N, 7.32. Found: C, 53.14; H, 5.16; N, 7.69.

*N*-Boc-(*S*)-3-chloro-3-(*N*-Boc-3-(nitromethyl)azetidin-3-yl)-2-oxoindole (**5b**)

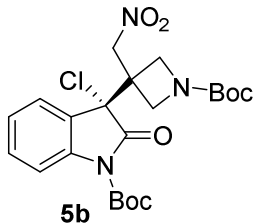

Compound **5b** was obtained from *N*-Boc-3-chlorooxindole **4** (48.2 mg, 0.180 mmol) and nitroalkene **2c** (32.1 mg, 0.150 mmol) by following the procedure described above. Chromatography (6:1:1 hexanes/dichloromethane/ethyl acetate) gave 64.9 mg (0.135 mmol, 90%) of a white amorphous solid. <sup>1</sup>H NMR (400 MHz, CDCl<sub>3</sub>) δ = 1.45 (s, 9H), 1.64 (s, 9H), 4.04 (d, *J* = 10.4 Hz, 1H), 4.27 (d, *J* = 9.1 Hz, 1H), 4.47 – 4.68 (m, 3H), 4.85 (d, *J* = 8.9 Hz, 1H), 7.22 (ddd, *J* = 7.6, 7.6, 1.0 Hz, 1H), 7.28 (dd, *J* = 7.8, 1.5 Hz, 1H), 7.45 (ddd, *J* = 8.2, 7.4, 1.5 Hz, 1H), 7.92 (dd, *J* = 8.3, 1.0 Hz, 1H). <sup>13</sup>C NMR (100 MHz, CDCl<sub>3</sub>) δ = 28.1, 28.4, 43.5, 53.5, 54.6, 66.0, 77.3, 80.7, 86.0, 116.2, 124.2, 124.8, 125.8, 132.0, 139.3, 148.4, 155.9, 169.7. The ee was determined as 97% using Phenomenex Amylose-1, hexanes/isopropanol 95:5, flow rate = 1mL/min condition. *t<sub>R</sub>*(major) = 13.6 min, *t<sub>R</sub>*(minor) = 19.1 min. Anal. Calcd. for C<sub>22</sub>H<sub>28</sub>ClN<sub>3</sub>O<sub>7</sub>: C, 54.83; H, 5.86; N, 8.72. Found: C, 54.72; H, 6.13; N, 8.49.

*N*-Boc-(*S*)-3-chloro-3-(*N*-Cbz-3-(nitromethyl)azetidin-3-yl)-2-oxoindole (**5c**)

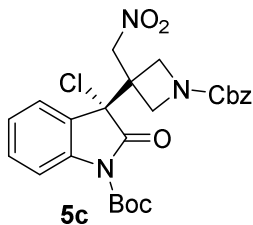

Compound **5c** was obtained from *N*-Boc-3-chlorooxindole **4** (48.2 mg, 0.180 mmol) and nitroalkene **2b** (37.2 mg, 0.150 mmol) by the procedure described above. Chromatography (6:1:1 hexanes/dichloromethane/ethyl acetate) gave 66.6 mg (0.129 mmol, 86%) of a white amorphous solid. <sup>1</sup>H NMR (400 MHz, CDCl<sub>3</sub>) δ = 1.64 (s, 9H), 4.14 (d, *J* = 10.1 Hz, 1H), 4.38 (d, *J* = 9.6 Hz, 1H), 4.56 (s, 2H), 4.69 (d, *J* = 14.7 Hz, 1H), 4.94 (d, *J* = 12.1 Hz, 1H), 5.12 (d, *J* = 1.8 Hz, 2H), 7.19 (ddd, *J* = 7.6, 7.6, 1.0 Hz, 1H), 7.26 (dd, *J* = 7.7, 1.5 Hz, 1H), 7.30 – 7.40 (m, 5H), 7.45 (ddd, *J* = 8.5, 7.5, 1.5 Hz, 1H), 7.92 (dd, *J* = 8.4, 1.0 Hz, 1H). <sup>13</sup>C NMR (100 MHz, CDCl<sub>3</sub>) δ = 28.1, 43.9, 53.7, 54.7, 65.9, 67.3, 77.1, 86.1, 116.2, 124.2, 124.6, 125.8, 128.2, 128.4, 128.7, 132.1, 136.3, 139.3, 148.3, 156.1, 169.7. The ee was determined as 96% using CHIRALCEL OD, hexanes/ethanol 90:10, flow rate = 1mL/min condition. *t*<sub>R</sub>(major) = 13.9 min, *t*<sub>R</sub>(minor) = 21.6 min. Anal. Calcd. for C<sub>25</sub>H<sub>26</sub>ClN<sub>3</sub>O<sub>7</sub>: C, 58.20; H, 5.08; N, 8.14. Found: C, 58.11; H, 5.29; N, 8.01.

### 3.7. General procedure for the organocatalysis with 1-fluoro-2-tetralone and ethyl 2-fluoro-3-oxo-3-phenylpropanoate

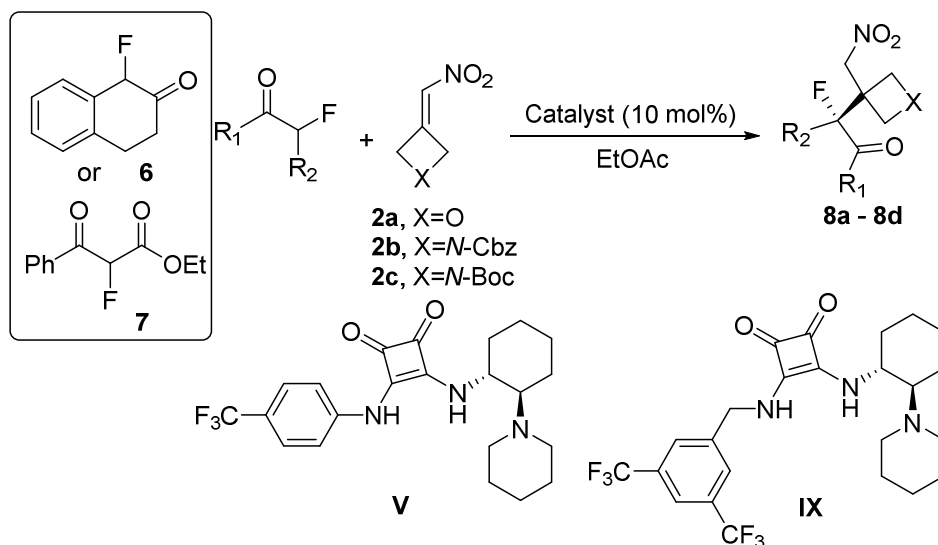

The organofluorine compound **6** or **7**, nitroalkene **2** (0.15 mmol) and organocatalyst (0.015 mmol, cat. **V** for 1-fluoro-2-tetralone, cat. **IX** for ethyl 2-fluoro-3-oxo-3-phenylpropanoate) were placed into an oven-dried vial and dissolved in ethyl acetate (0.45 mL). The vial was then capped, cooled to a specified temperature and stirred until completion. The solvent was then evaporated by a gentle flow of nitrogen and the residue was purified by column chromatography as described below. Racemic reaction products for HPLC analysis were obtained by applying racemic catalyst **I** in the above procedure at room temperature.

(*R*)-1-Fluoro-1-(3-(nitromethyl)oxetan-3-yl)-3,4-dihydronaphthalen-2(1H)-one (**8a**)

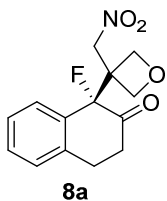

Compound **8a** was obtained from 1-fluoro-2-tetralone **7** (31.9 mg, 0.195 mmol) and nitroalkene **2a** (17.3 mg, 0.150 mmol) using catalyst **V** (6.3 mg, 0.015 mmol) by following the procedure described above. The reaction was running at 0 °C for 110 hours. Chromatography (3.5:1 hexanes/ethyl acetate) gave 35.3 mg (0.126 mmol, 84%) of a white amorphous solid. <sup>1</sup>H NMR (400 MHz, CDCl<sub>3</sub>) δ = 2.70 (d, *J* = 5.9 Hz, 1H), 2.72 (d, *J* = 5.9 Hz, 1H), 3.08 – 3.19 (m, 2H), 4.48 (dd, *J* = 7.4, 1.4 Hz, 1H), 4.54 (dd, *J* = 6.8, 3.1 Hz, 1H), 4.84 (d, *J* = 13.9 Hz, 1H), 4.94 (d, *J* = 6.8 Hz, 1H), 5.02 (d, *J* = 13.9 Hz, 1H), 5.16 (dd, *J* = 7.3, 1.2 Hz, 1H), 7.29 (dd, *J* = 7.8, 1.4 Hz, 1H), 7.34 (dd, *J* = 7.7, 1.5 Hz, 1H), 7.39 (ddd, *J* = 7.6, 7.6, 1.5 Hz, 1H), 7.45 (ddd, *J* = 7.4, 7.4, 1.4 Hz, 1H). <sup>13</sup>C NMR (100 MHz, CDCl<sub>3</sub>) δ = 27.8, 35.8, 49.2 (d, *J*<sub>C-F</sub> = 28.8 Hz), 73.9 (d, *J*<sub>C-F</sub> = 8.3 Hz), 74.0 (d, *J*<sub>C-F</sub> = 8.5 Hz), 76.7 (d, *J*<sub>C-F</sub> = 2.7 Hz), 92.9 (d, *J*<sub>C-F</sub> = 184.0 Hz), 127.2 (d, *J*<sub>C-F</sub> = 6.6 Hz), 127.9, 129.2, 130.5 (d, *J*<sub>C-F</sub> = 2.6 Hz), 131.8 (d, *J*<sub>C-F</sub> = 20.6 Hz), 138.2 (d, *J*<sub>C-F</sub> = 5.2 Hz), 204.3 (d, *J*<sub>C-F</sub> = 17.6 Hz). <sup>19</sup>F NMR (376 MHz, CDCl<sub>3</sub>) δ = -145.7. The ee was determined as 89% using Phenomenex Amylose-1, hexanes/ethanol 90:10, flow rate = 1mL/min condition. *t*<sub>R</sub>(major) = 29.8 min, *t*<sub>R</sub>(minor) = 23.3 min. Anal. Calcd. for C<sub>14</sub>H<sub>14</sub>FN<sub>2</sub>O<sub>4</sub>: C, 60.21; H, 5.05; N, 5.02. Found: C, 60.39; H, 4.79; N, 5.17.

Ethyl (*R*)-2-fluoro-2-(3-(nitromethyl)oxetan-3-yl)-3-oxo-3-phenylpropanoate (**8b**)

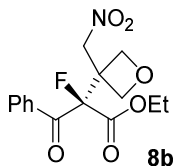

Compound **8b** was obtained from ethyl 2-fluoro-3-oxo-3-phenylpropanoate **7** (34.7 mg, 0.165 mmol) and nitroalkene **2a** (17.3 mg, 0.150 mmol) using catalyst **IX** (7.6 mg, 0.015 mmol) by following the procedure described above. The reaction was running at -5 °C for 70 hours. Chromatography (5:1 hexanes/ethyl acetate) gave 47.8 mg (0.147mmol, 98%) of a colorless oil. <sup>1</sup>H NMR (400 MHz, CDCl<sub>3</sub>) δ = 1.16 (t, *J* = 7.1 Hz, 3H), 4.17 (dq, *J* = 10.8, 7.1 Hz, 1H), 4.28 (dq, *J* = 10.8, 7.2 Hz, 1H), 4.73 (dd, *J* = 7.6, 2.0 Hz, 1H), 4.76 – 4.81 (m, 2H), 5.09 – 5.17 (m, 2H), 5.20 (d, *J* = 15.0 Hz, 1H), 7.49 (dd, *J* = 8.3, 7.5 Hz, 2H), 7.64 (dddd, *J* = 7.4, 7.4, 1.5, 1.5 Hz, 1H), 7.99 (dd, *J* = 8.6, 1.5 Hz, 2H). <sup>13</sup>C NMR (100 MHz, CDCl<sub>3</sub>) δ = 13.7, 47.2 (d, *J*<sub>C-F</sub> = 24.1 Hz), 63.7, 73.8 (d, *J*<sub>C-F</sub> = 8.0 Hz), 75.8 (d, *J*<sub>C-F</sub> = 2.7 Hz), 77.2, 96.6 (d,

$J_{C-F} = 202.5$  Hz), 129.1, 129.7 (d,  $J_{C-F} = 5.2$  Hz), 133.1 (d,  $J_{C-F} = 3.8$  Hz), 134.9, 165.4 (d,  $J_{C-F} = 25.5$  Hz), 190.0 (d,  $J_{C-F} = 24.5$  Hz).  $^{19}\text{F}$  NMR (376 MHz,  $\text{CDCl}_3$ )  $\delta = -161.6$ . The ee was determined as 78% using Phenomenex Amylose-1, hexanes/isopropanol 90:10, flow rate = 1mL/min condition.  $t_R(\text{major}) = 13.0$  min,  $t_R(\text{minor}) = 15.1$  min. Anal. Calcd. for  $\text{C}_{15}\text{H}_{16}\text{FNO}_6$ : C, 55.39; H, 4.96; N, 4.31. Found: C, 55.33; H, 5.34; N, 4.46.

Ethyl (*R*)-2-fluoro-2-(*N*-Cbz-3-(nitromethyl)azetidin-3-yl)-3-oxo-3-phenylpropanoate (**8c**)

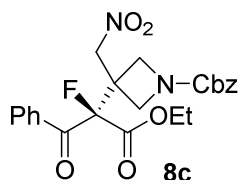

Compound **8c** was obtained from ethyl 2-fluoro-3-oxo-3-phenylpropanoate **7** (34.7 mg, 0.165 mmol) and nitroalkene **2b** (37.2 mg, 0.150 mmol) using catalyst **IX** (7.6 mg, 0.015 mmol) by following the procedure described above. The reaction was running at  $-5$  °C for 70 hours. Chromatography (5:1 hexanes/ethyl acetate) gave 63.9 mg (0.139mmol, 93%) of a colorless oil.  $^1\text{H}$  NMR (400 MHz,  $\text{CDCl}_3$ )  $\delta = 1.13$  (t,  $J = 7.1$  Hz, 3H), 4.08 – 4.29 (m, 5H), 4.59 (d,  $J = 10.2$  Hz, 1H), 4.96 (dd,  $J = 14.8, 1.7$  Hz, 1H), 5.10 (s, 2H), 5.15 (d,  $J = 15.0$  Hz, 1H), 7.28 – 7.39 (m, 5H), 7.48 (dd,  $J = 8.4, 7.3$  Hz, 2H), 7.64 (dddd,  $J = 7.5, 7.5, 1.4, 1.4$  Hz, 1H), 7.96 (dd,  $J = 8.7, 1.5$  Hz, 2H).  $^{13}\text{C}$  NMR (100 MHz,  $\text{CDCl}_3$ )  $\delta = 13.7, 41.9$  (d,  $J_{C-F} = 24.1$  Hz), 53.2, 55.1, 63.8, 67.2, 76.6, 96.7 (d,  $J_{C-F} = 202.9$  Hz), 128.2, 128.3, 128.7, 129.1, 129.7 (d,  $J_{C-F} = 5.3$  Hz), 133.1 (d,  $J_{C-F} = 3.7$  Hz), 135.0, 136.3, 156.0, 165.1 (d,  $J_{C-F} = 25.4$  Hz), 189.9 (d,  $J_{C-F} = 24.6$  Hz).  $^{19}\text{F}$  NMR (376 MHz,  $\text{CDCl}_3$ )  $\delta = -161.9, -161.7$ . The ee was determined as 77% using Phenomenex Amylose-1, hexanes/ethanol 90:10, flow rate = 1mL/min condition.  $t_R(\text{major}) = 22.8$  min,  $t_R(\text{minor}) = 28.0$  min. Anal. Calcd. for  $\text{C}_{23}\text{H}_{23}\text{FN}_2\text{O}_7$ : C, 60.26; H, 5.06; N, 6.11. Found: C, 59.96; H, 4.89; N, 5.72.

Ethyl (*R*)-2-fluoro-2-(*N*-Boc-3-(nitromethyl)azetidin-3-yl)-3-oxo-3-phenylpropanoate (**8d**)

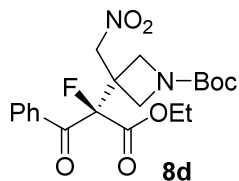

Compound **8d** was obtained from ethyl 2-fluoro-3-oxo-3-phenylpropanoate **7** (34.7 mg, 0.165 mmol) and nitroalkene **2c** (32.1 mg, 0.150 mmol) using catalyst **IX** (7.6 mg, 0.015 mmol) by following the procedure described above. The reaction was running at  $-5$  °C for 70 hours. Chromatography (5:1 hexanes/ethyl acetate) gave 58.6 mg (0.138mmol, 92%) of a colorless oil.  $^1\text{H}$  NMR (400 MHz,  $\text{CDCl}_3$ )  $\delta = 1.16$  (t,  $J = 7.1$  Hz, 3H), 1.43 (s, 9H), 4.05 (d,  $J = 10.0$  Hz, 1H), 4.10 (ddd,  $J = 10.1, 5.1, 2.8$  Hz, 2H), 4.18 (dq,  $J = 10.9, 7.2$  Hz, 1H), 4.27 (dq,  $J =$

10.8, 7.2 Hz, 1H), 4.50 (d,  $J$  = 10.2 Hz, 1H), 4.95 (dd,  $J$  = 14.7, 1.7 Hz, 1H), 5.14 (d,  $J$  = 14.8 Hz, 1H), 7.48 (dd,  $J$  = 8.4, 7.3 Hz, 2H), 7.63 (dddd,  $J$  = 8.3, 8.3, 1.3, 1.3 Hz, 1H), 7.97 (dd,  $J$  = 7.4, 1.5 Hz, 2H).  $^{13}\text{C}$  NMR (100 MHz,  $\text{CDCl}_3$ )  $\delta$  = 13.7, 28.4, 41.5 (d,  $J_{\text{C-F}}$  = 24.1 Hz), 53.1, 54.9, 63.7, 77.3 (d,  $J_{\text{C-F}}$  = 5.0 Hz), 80.5, 96.9 (d,  $J_{\text{C-F}}$  = 202.5 Hz), 129.0, 129.7 (d,  $J_{\text{C-F}}$  = 5.4 Hz), 133.3 (d,  $J_{\text{C-F}}$  = 3.8 Hz), 134.9, 155.8, 165.2 (d,  $J_{\text{C-F}}$  = 25.4 Hz), 190.1 (d,  $J_{\text{C-F}}$  = 24.8 Hz).  $^{19}\text{F}$  NMR (376 MHz,  $\text{CDCl}_3$ )  $\delta$  = -161.7. The ee was determined as 80% using Phenomenex Amylose-1, hexanes/ethanol 90:10, flow rate = 1 mL/min condition.  $t_{\text{R}}(\text{major})$  = 8.2 min,  $t_{\text{R}}(\text{minor})$  = 12.1 min. Anal. Calcd. for  $\text{C}_{20}\text{H}_{25}\text{FN}_2\text{O}_7$ : C, 56.60; H, 5.94; N, 6.60. Found: C, 56.53; H, 6.00; N, 6.75.

### 3.8. Selective Transformations

#### 3.8.1. Oxindole ring methanolysis

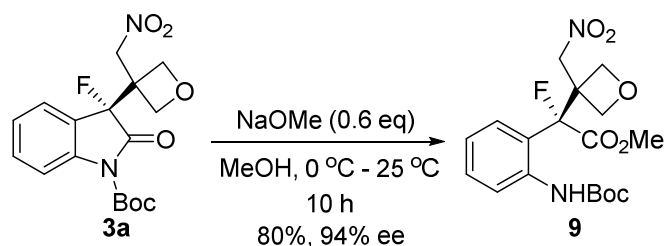

To a solution of compound **3a** (44.0 mg, 0.120 mmol) in anhydrous methanol (1.5 mL) was added sodium methoxide (3.9 mg, 0.072 mmol) at 0 °C. The reaction was allowed to warm to room temperature and stirred for 10 hours. Upon completion, the reaction was quenched with aqueous  $\text{NH}_4\text{Cl}$  (0.5 mL) and extracted with  $\text{Et}_2\text{O}$  (4 mL, 3 times). The ether layers were combined, dried over  $\text{MgSO}_4$ , filtrated, and concentrated under reduced pressure. The residue was purified by column chromatography (3:1:1 hexanes/dichloromethane/diethyl ether) to give compound **9** (38.1 mg, 0.096 mmol) in 80% yield as a white amorphous solid.  $^1\text{H}$  NMR (400 MHz,  $\text{CDCl}_3$ )  $\delta$  = 1.52 (s, 9H), 3.86 (s, 3H), 4.74 – 4.86 (m, 4H), 4.98 (d,  $J$  = 7.6 Hz, 1H), 5.08 (d,  $J$  = 7.5 Hz, 1H), 6.95 (dd,  $J$  = 8.2, 1.5 Hz, 1H), 7.00 (d,  $J$  = 7.0 Hz, 1H), 7.17 (ddd,  $J$  = 7.7, 7.7, 1.7 Hz, 1H), 7.45 (ddd,  $J$  = 8.5, 7.1, 1.5 Hz, 1H), 7.82 (dd,  $J$  = 7.7, 1.7 Hz, 1H).  $^{13}\text{C}$  NMR (100 MHz,  $\text{CDCl}_3$ )  $\delta$  = 28.2, 48.1 (d,  $J_{\text{C-F}}$  = 24.3 Hz), 53.7, 73.9 (d,  $J_{\text{C-F}}$  = 6.9 Hz), 74.1 (d,  $J_{\text{C-F}}$  = 7.4 Hz), 77.1 (d,  $J_{\text{C-F}}$  = 3.8 Hz), 81.1, 97.9 (d,  $J_{\text{C-F}}$  = 190.3 Hz), 124.5, 124.9 (d,  $J_{\text{C-F}}$  = 19.9 Hz), 125.9 (d,  $J_{\text{C-F}}$  = 9.1 Hz), 126.2, 130.9 (d,  $J_{\text{C-F}}$  = 1.7 Hz), 136.9 (d,  $J_{\text{C-F}}$  = 1.8 Hz), 152.8, 168.6 (d,  $J_{\text{C-F}}$  = 25.8 Hz).  $^{19}\text{F}$  NMR (376 MHz,  $\text{CDCl}_3$ )  $\delta$  = -154.0. The ee was determined as 94% using Phenomenex Amylose-1, hexanes/ethanol 90:10, flow rate = 1 mL/min condition.  $t_{\text{R}}(\text{major})$  = 10.4 min,  $t_{\text{R}}(\text{minor})$  = 11.5 min. Anal. Calcd. for  $\text{C}_{18}\text{H}_{23}\text{FN}_2\text{O}_7$ : C, 54.27; H, 5.82; N, 7.03. Found: C, 53.95; H, 5.98; N, 7.06.

### 3.8.2. Stereoselective cyclopropanation

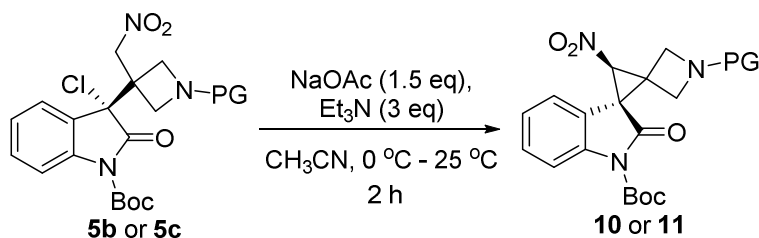

To a mixture of compound **5b** or **5c** (0.070 mmol) and sodium acetate (0.105 mmol, 1.5 eq) in anhydrous acetonitrile (0.7 mL) was added triethylamine (0.21 mmol, 3 eq) at 0 °C. The reaction was allowed to warm to room temperature and stirred for 2 hours. Upon completion, the solvent was evaporated by a gentle flow of nitrogen and the residue was purified by column chromatography as described below.

di-*tert*-Butyl (2'*S*,3'*S*)-3'-nitro-2''-oxodispiro[azetidine-3,1'-cyclopropane-2',3''-indoline]-1,1''-dicarboxylate (**10**)

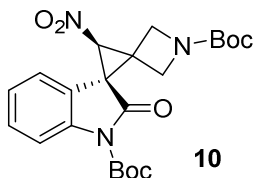

Compound **10** was obtained from **5b** (33.7 mg, 0.070 mmol) using sodium acetate (8.6 mg, 0.105 mmol) and triethylamine (29.3  $\mu\text{L}$ , 0.21 mmol) by following the procedure described above. Chromatography (1:7 ethyl acetate/hexanes) gave 29.3 mg (0.066 mmol, 94%) of a white amorphous solid.  $^1\text{H}$  NMR (400 MHz,  $\text{CDCl}_3$ )  $\delta$  = 1.43 (s, 9H), 1.65 (s, 9H), 4.17 (d,  $J$  = 10.2 Hz, 1H), 4.32 (d,  $J$  = 10.2 Hz, 1H), 4.36 (d,  $J$  = 10.2 Hz, 1H), 4.69 (d,  $J$  = 10.1 Hz, 1H), 4.92 (s, 1H), 7.16 (dd,  $J$  = 7.6, 1.5 Hz, 1H), 7.21 (ddd,  $J$  = 7.6, 7.4, 1.1 Hz, 1H), 7.43 (ddd,  $J$  = 8.3, 7.5, 1.5 Hz, 1H), 8.01 (dd,  $J$  = 8.3, 1.1 Hz, 1H).  $^{13}\text{C}$  NMR (100 MHz,  $\text{CDCl}_3$ )  $\delta$  = 28.2, 28.5, 35.2, 40.9, 50.7, 53.8, 70.9, 80.7, 85.7, 115.9, 119.4, 123.9, 125.0, 129.9, 141.3, 148.5, 155.7, 169.2. The ee was determined as 95% using CHIRALPAK IA, hexanes/isopropanol 95:5, flow rate = 1mL/min condition.  $t_{\text{R}}(\text{major})$  = 6.2 min,  $t_{\text{R}}(\text{minor})$  = 7.1 min. Anal. Calcd. for  $\text{C}_{22}\text{H}_{27}\text{N}_3\text{O}_7$ : C, 59.32; H, 6.11; N, 9.43. Found: C, 59.05; H, 6.35; N, 9.41.



1-Benzyl 1''-(*tert*-butyl) (2'*S*,3'*S*)-3'-nitro-2''-oxodispiro[azetidine-3,1'-cyclopropane-2',3''-indoline]-1,1''-dicarboxylate (**11**)

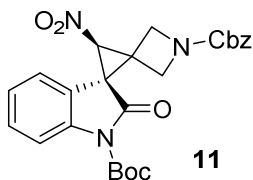

Compound **11** was obtained from **5c** (34.6 mg, 0.067 mmol) using sodium acetate (8.2 mg, 0.100 mmol) and triethylamine (28.1  $\mu$ L, 0.201 mmol) by following the procedure described above. Chromatography (1:5 ethyl acetate/hexanes) gave 29.0 mg (0.061 mmol, 90%) of a white amorphous solid.  $^1\text{H}$  NMR (400 MHz,  $\text{CDCl}_3$ )  $\delta$  = 1.65 (s, 9H), 4.25 (d,  $J$  = 10.2 Hz, 1H), 4.41 (d,  $J$  = 10.3 Hz, 1H), 4.45 (d,  $J$  = 10.3 Hz, 1H), 4.79 (d,  $J$  = 10.2 Hz, 1H), 4.92 (s, 1H), 5.07 (d,  $J$  = 12.3 Hz, 1H), 5.11 (d,  $J$  = 12.2 Hz, 1H), 7.13 (dd,  $J$  = 7.6, 1.4 Hz, 1H), 7.20 (ddd,  $J$  = 7.7, 7.7, 1.1 Hz, 1H), 7.29 – 7.38 (m, 5H), 7.43 (ddd,  $J$  = 8.3, 7.5, 1.4 Hz, 1H), 8.01 (dd,  $J$  = 8.3, 1.2 Hz, 1H).  $^{13}\text{C}$  NMR (100 MHz,  $\text{CDCl}_3$ )  $\delta$  = 28.2, 35.2, 40.8, 50.9, 54.0, 67.4, 70.7, 85.7, 115.9, 119.2, 123.8, 125.0, 128.3, 128.4, 128.7, 130.0, 136.2, 141.3, 148.5, 156.1, 169.1. The ee was determined as 95% using CHIRALPAK IA, hexanes/isopropanol 90:10, flow rate = 1 mL/min condition.  $t_{\text{R}}(\text{major})$  = 11.7 min,  $t_{\text{R}}(\text{minor})$  = 18.1 min. Anal. Calcd. for  $\text{C}_{25}\text{H}_{25}\text{N}_3\text{O}_7$ : C, 62.62; H, 5.26; N, 8.76. Found: C, 62.54; H, 5.58; N, 8.73.

### 3.8.3. Reductive spiro pyrrolidine synthesis<sup>11</sup>

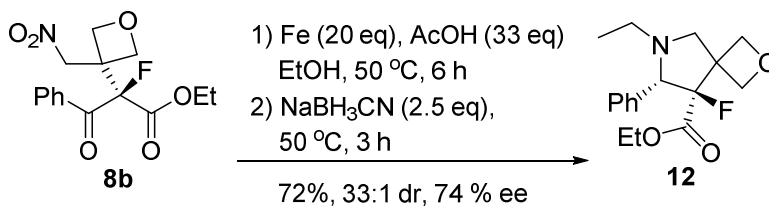

To a mixture of compound **8b** (31.8 mg, 0.098 mmol) and iron powder (110.0 mg, 1.97 mmol) in ethanol (2 mL) was added acetic acid (187  $\mu$ L, 3.26 mmol). The reaction was heated to 50  $^{\circ}\text{C}$  and stirred for 6 hours. Upon complete consumption of **8b**, sodium cyanoborohydride (15.5 mg, 0.247 mmol) was added and the mixture was stirred at 50  $^{\circ}\text{C}$  for another 3 hours. Upon completion, the reaction was quenched with aqueous  $\text{NH}_4\text{Cl}$  (0.5 mL), extracted with  $\text{Et}_2\text{O}$  (4 mL, 3 times). The ether layers were combined, dried over  $\text{Na}_2\text{SO}_4$ , filtrated, and concentrated under reduced pressure. The residue was purified by chromatography (6:1 hexanes/ethyl acetate) to give compound **12** (21.8 mg, 0.071 mmol) in 72% yield as a colorless oil.  $^1\text{H}$  NMR (400 MHz,  $\text{CDCl}_3$ )  $\delta$  = 0.94 (t,  $J$  = 7.2 Hz, 3H), 1.07 (t,  $J$  = 7.2 Hz, 3H), 2.25 (dq,  $J$  = 12.2, 6.9 Hz, 1H), 2.71 (dq,  $J$  = 12.2, 7.4 Hz, 1H), 3.00 (d,  $J$  = 9.2 Hz, 1H), 3.73 – 3.89 (m, 3H), 3.91 (d,  $J$  = 9.6 Hz, 1H), 4.47 (dd,  $J$  = 6.6, 2.5 Hz, 1H), 4.54 (dd,  $J$  = 6.8,

1.4 Hz, 1H), 4.91 (d,  $J = 6.7$  Hz, 1H), 4.95 (d,  $J = 6.5$  Hz, 1H), 7.26 – 7.31 (m, 5H).  $^{13}\text{C}$  NMR (100 MHz,  $\text{CDCl}_3$ )  $\delta = 12.9, 13.6, 47.6, 49.9$  (d,  $J_{\text{C-F}} = 20.9$  Hz), 61.4, 62.5 (d,  $J_{\text{C-F}} = 1.4$  Hz), 75.7 (d,  $J_{\text{C-F}} = 14.1$  Hz), 77.2 (d,  $J_{\text{C-F}} = 26.8$  Hz), 79.4 (d,  $J_{\text{C-F}} = 6.6$  Hz), 102.4 (d,  $J_{\text{C-F}} = 197.3$  Hz), 128.0, 128.1, 128.1, 136.6 (d,  $J_{\text{C-F}} = 4.5$  Hz), 166.7 (d,  $J_{\text{C-F}} = 28.8$  Hz).  $^{19}\text{F}$  NMR (376 MHz,  $\text{CDCl}_3$ )  $\delta = -157.2$  (d,  $J = 29.6$  Hz). The ee was determined as 74% using CHIRALCEL OD, hexanes/isopropanol 95:5, flow rate = 1 mL/min condition.  $t_{\text{R}}(\text{major}) = 5.9$  min,  $t_{\text{R}}(\text{minor}) = 6.5$  min. Anal. Calcd. for  $\text{C}_{17}\text{H}_{22}\text{FNO}_3$ : C, 66.43; H, 7.21; N, 4.56. Found: C, 66.30; H, 7.30; N, 4.87.

### 3.8.4. Diastereoselective oxetane ring opening

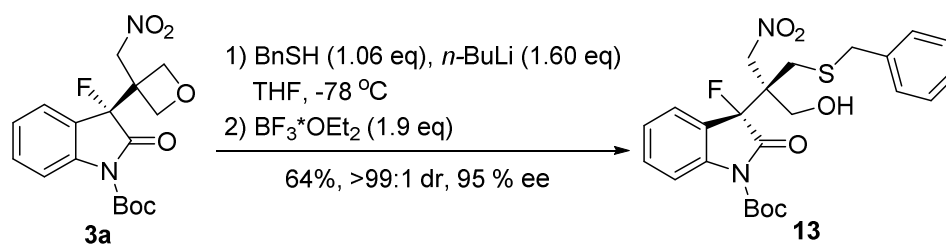

An oven-dried 25 mL 2-necked flask with rubber septum was charged with benzyl mercaptan (24.8  $\mu\text{L}$ , 0.212 mmol) and anhydrous THF (0.8 mL) under nitrogen atmosphere. The solution was cooled to -78 °C and a 2.5 M solution of *n*-BuLi (128  $\mu\text{L}$ , 0.352 mmol) was added. The mixture was stirred for 3 minutes before addition of  $\text{BF}_3 \cdot \text{OEt}_2$  (53.9 mg, 0.38 mmol). After another 10 minutes, a solution of compound **3a** (73.2 mg, 0.2 mmol) in anhydrous THF (0.4 mL) was added dropwise and the reaction was stirred at -78 °C for 90 minutes. The reaction was quenched by dropwise addition of 15% aqueous  $\text{NH}_4\text{Cl}$  (0.8 mL) at -78 °C. The cooling bath was removed to allow the flask to warm to room temperature. The reaction mixture was then extracted with  $\text{Et}_2\text{O}$  (4 mL, 3 times). The ether layers were combined, dried over  $\text{Na}_2\text{SO}_4$ , filtrated, and concentrated under reduced pressure. The residue was purified by chromatography (5:1 hexanes/ethyl acetate) to give compound **13** (62.4 mg, 0.127 mmol) in 64% yield as a white amorphous solid.  $^1\text{H}$  NMR (400 MHz,  $\text{CDCl}_3$ )  $\delta = 1.58$  (s, 9H), 2.06 (dd,  $J = 6.5, 5.0$  Hz, 1H), 3.62 (d,  $J = 12.4$  Hz, 1H), 3.80 (d,  $J = 12.4$  Hz, 1H), 3.86 (ddd,  $J = 12.0, 6.6, 2.6$  Hz, 1H), 4.00 (d,  $J = 12.5$  Hz, 1H), 4.06 (d,  $J = 10.4$  Hz, 1H), 4.12 (d,  $J = 10.4$  Hz, 1H), 4.32 (dd,  $J = 12.0, 4.9$  Hz, 1H), 4.63 (d,  $J = 12.4$  Hz, 1H), 7.09 – 7.16 (m, 3H), 7.16 – 7.25 (m, 3H), 7.41 (ddd,  $J = 8.8, 7.5, 1.5$  Hz, 1H), 7.46 (dd,  $J = 7.8, 1.6$  Hz, 1H), 7.80 (d,  $J = 8.4$  Hz, 1H).  $^{13}\text{C}$  NMR (100 MHz,  $\text{CDCl}_3$ )  $\delta = 28.4, 34.8$  (d,  $J_{\text{C-F}} = 5.4$  Hz), 55.0 (d,  $J_{\text{C-F}} = 26.6$  Hz), 60.5 (d,  $J_{\text{C-F}} = 12.2$  Hz), 71.8, 75.3, 83.2, 108.9 (d,  $J_{\text{C-F}} = 210.4$  Hz), 115.7, 121.7 (d,  $J_{\text{C-F}} = 24.0$  Hz), 123.7 (d,  $J_{\text{C-F}} = 2.6$  Hz), 125.8, 127.3, 128.6, 129.1, 132.6 (d,  $J_{\text{C-F}} = 2.7$  Hz), 136.8, 143.1 (d,  $J_{\text{C-F}} = 5.5$  Hz), 150.6, 178.7 (d,  $J_{\text{C-F}} = 21.8$  Hz).  $^{19}\text{F}$  NMR (376 MHz,  $\text{CDCl}_3$ )  $\delta = -151.2$ . The ee was determined as 95% using CHIRALPAK IB,

hexanes/isopropanol 95:5, flow rate = 1mL/min condition.  $t_R(\text{major}) = 19.6$  min,  $t_R(\text{minor}) = 17.7$  min. Anal. Calcd. for  $\text{C}_{24}\text{H}_{27}\text{FN}_2\text{O}_6\text{S}$ : C, 58.76; H, 5.55; N, 5.71. Found: C, 58.99; H, 5.78; N, 5.88.

## 4. $^1\text{H}$ , $^{13}\text{C}$ , $^{19}\text{F}$ NMR Spectra

### Catalyst VI

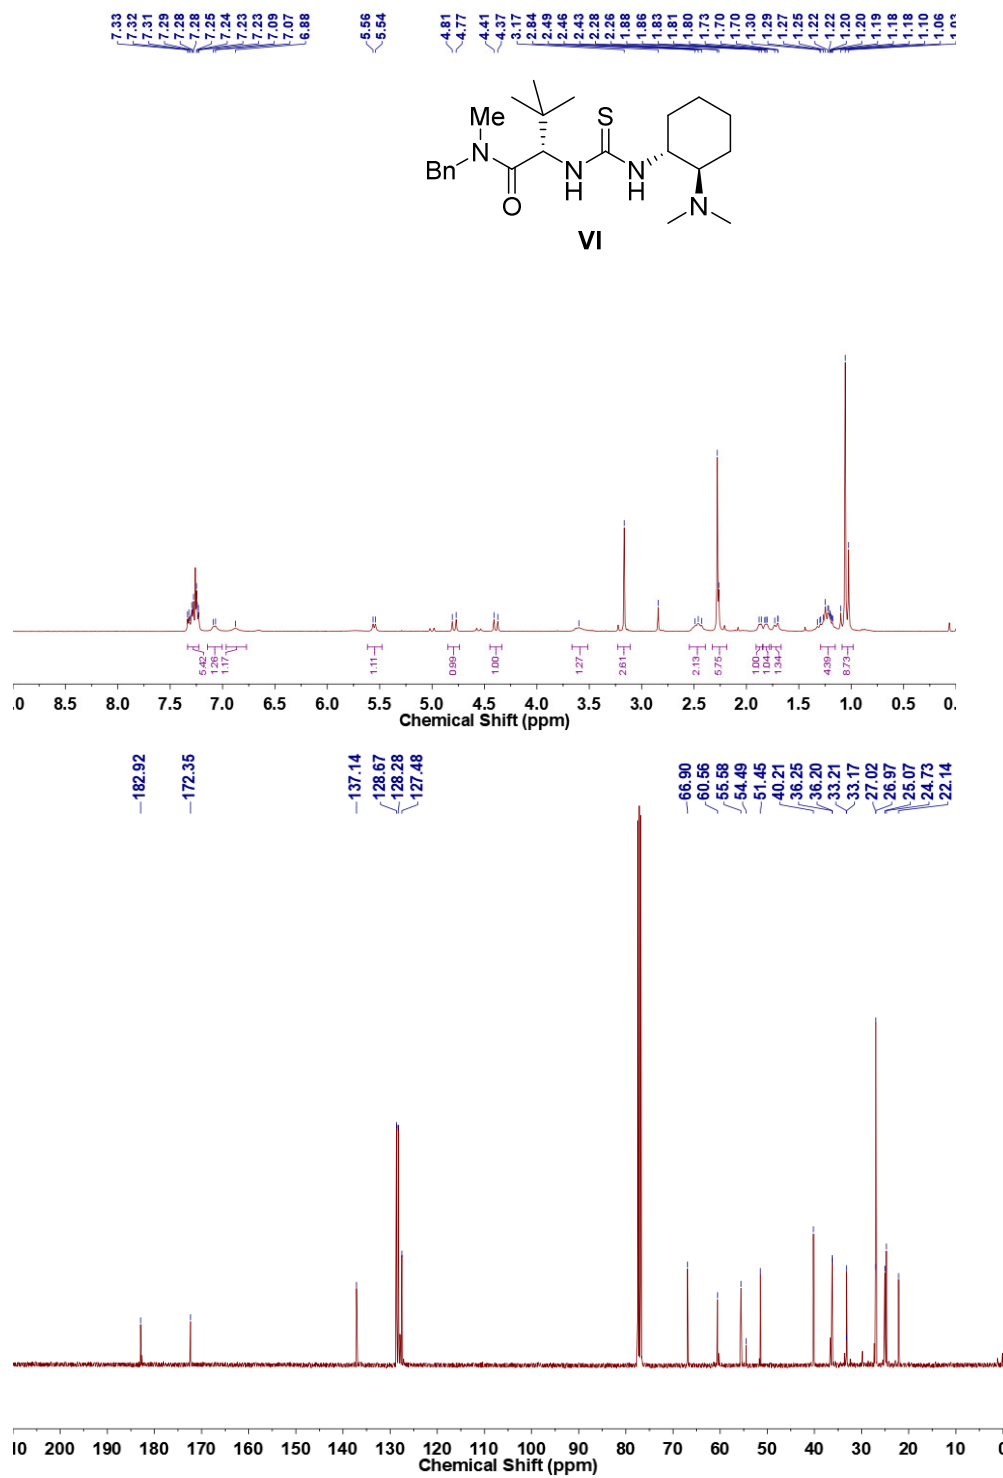

*N*-Boc-3,5-difluorooxindole (**1e**)

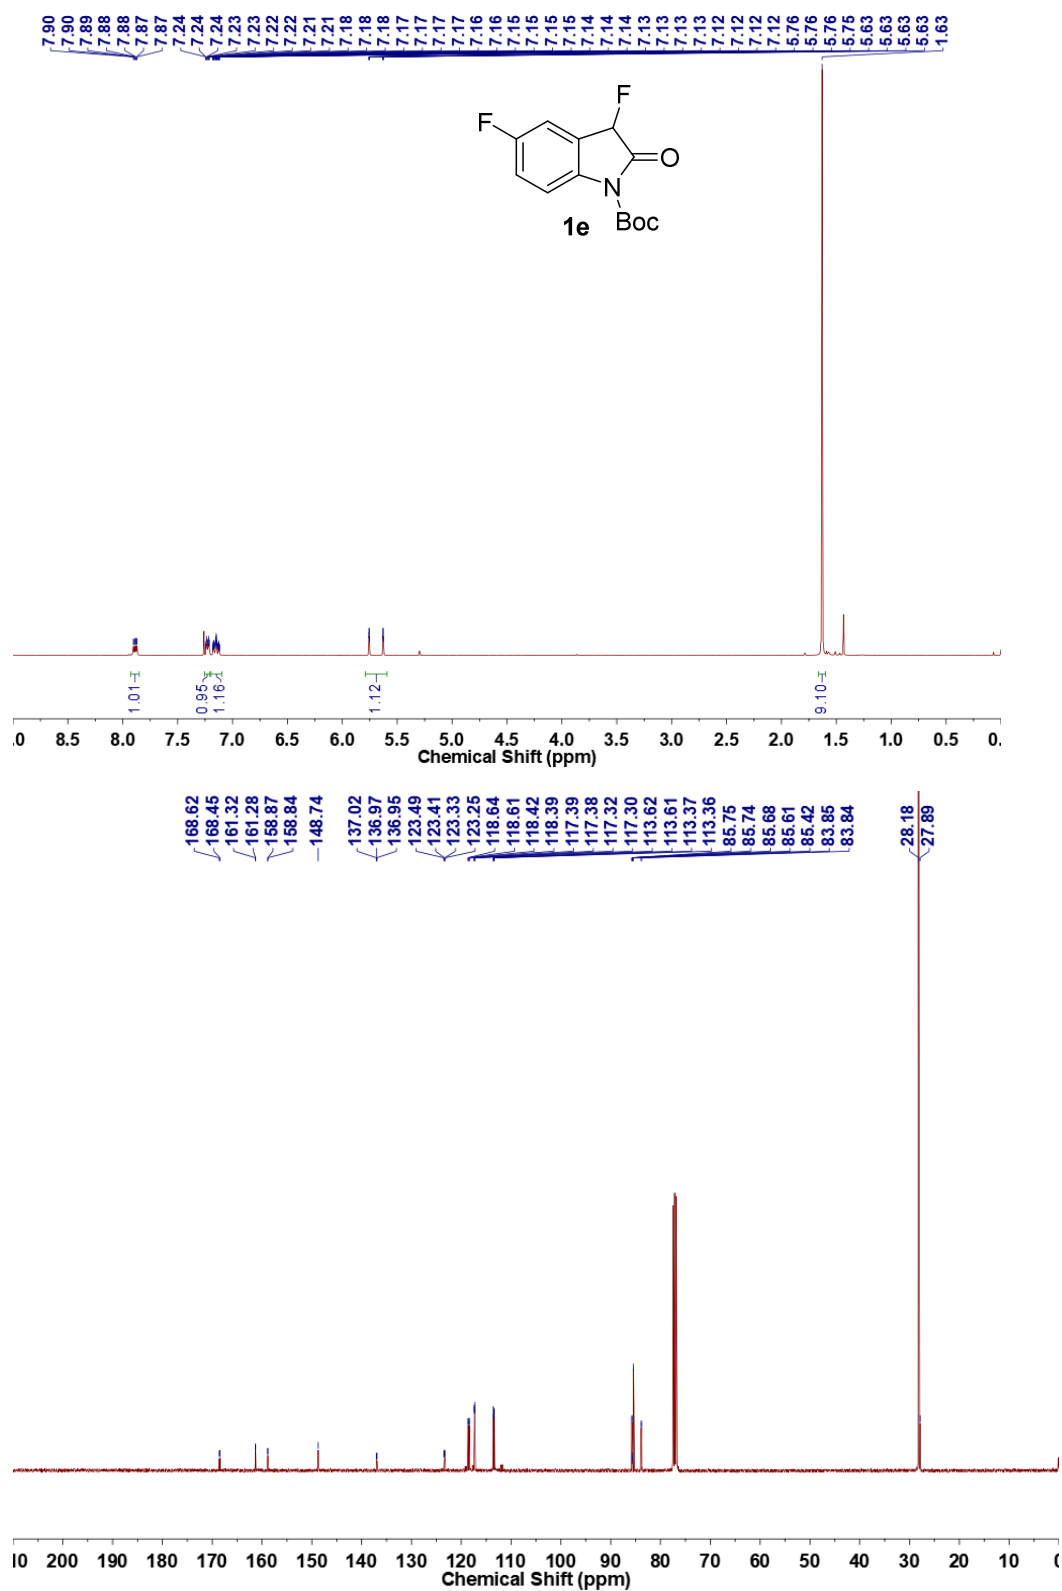

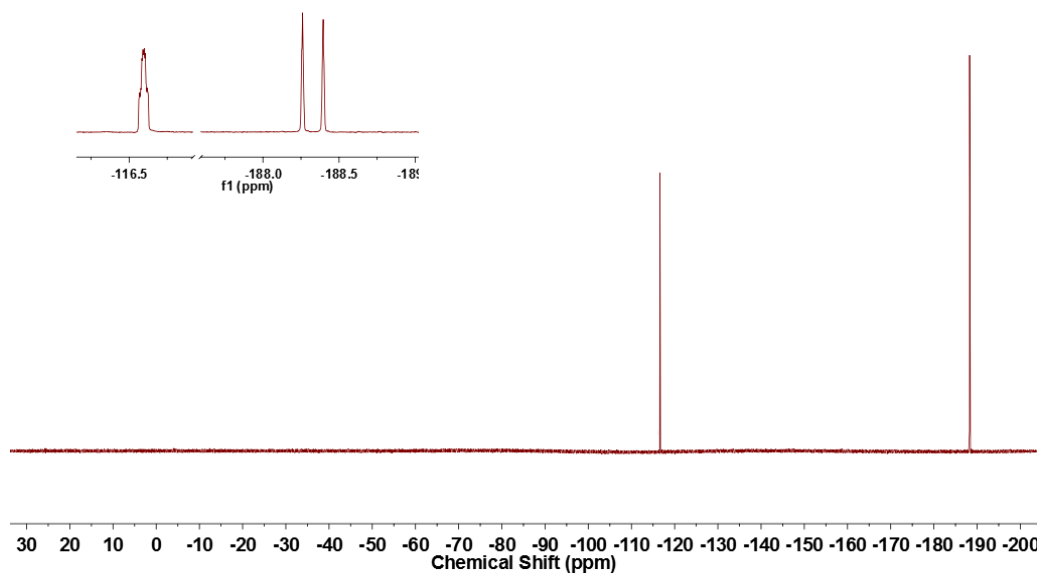

Methyl *N*-Boc-3-fluorooxindole-6-carboxylate (**1g**)

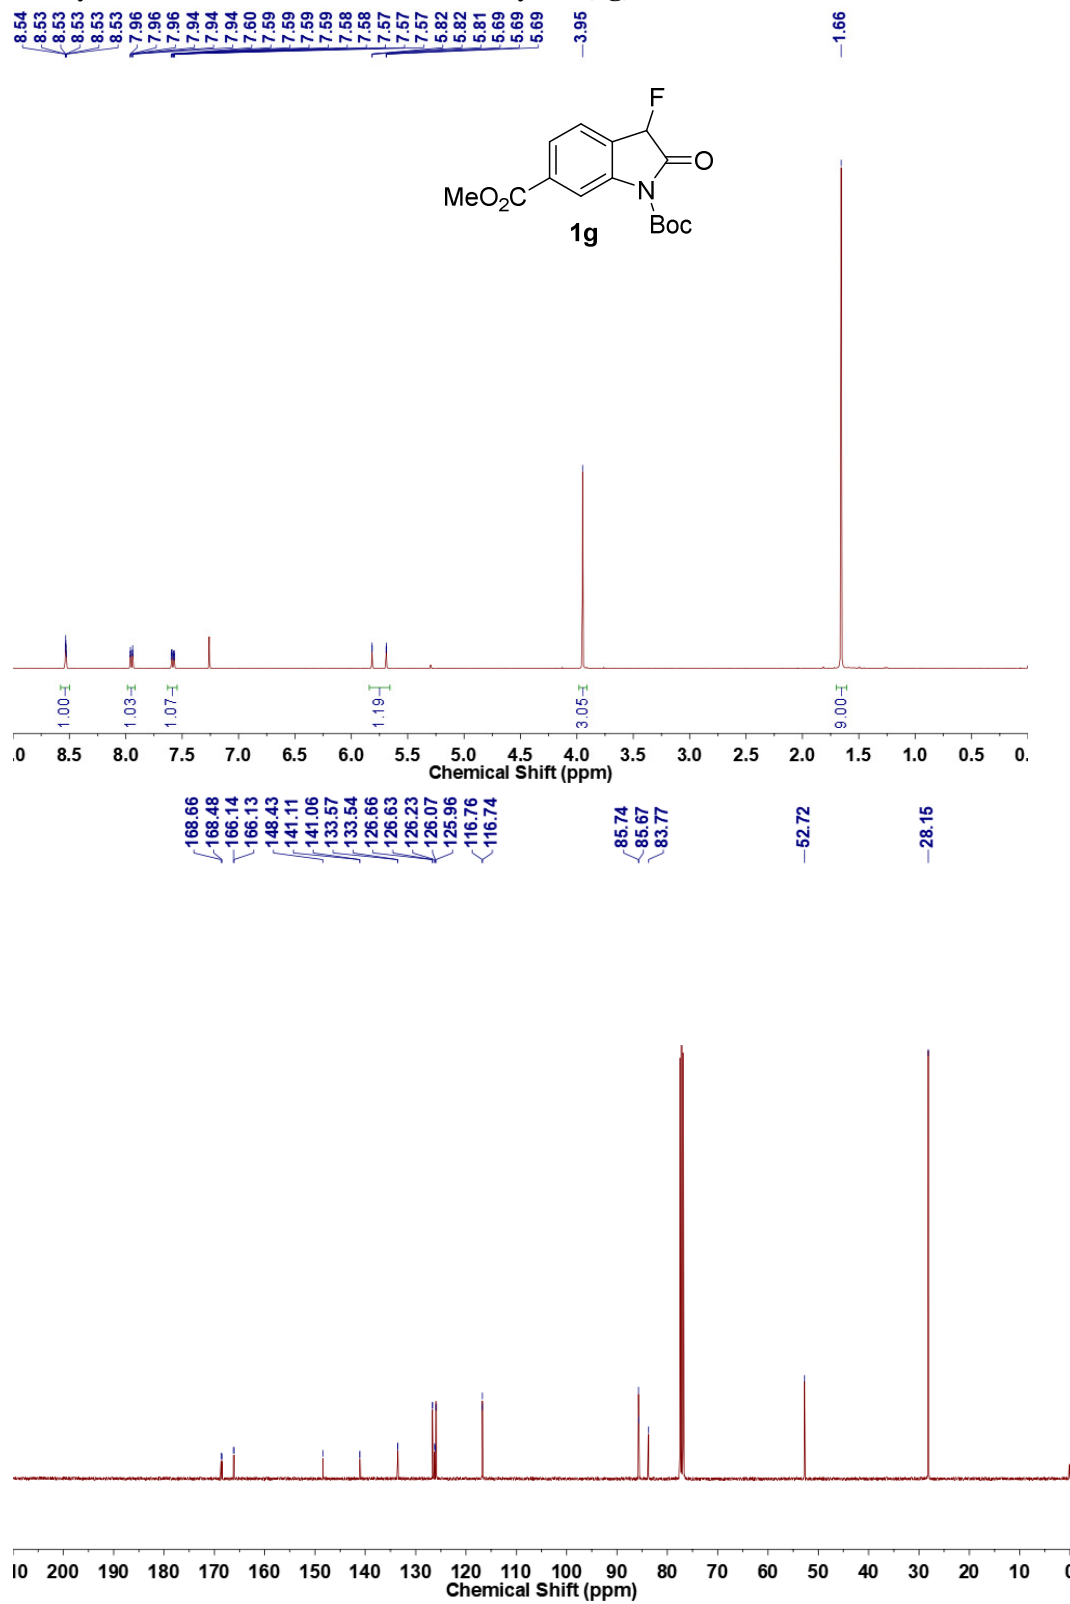

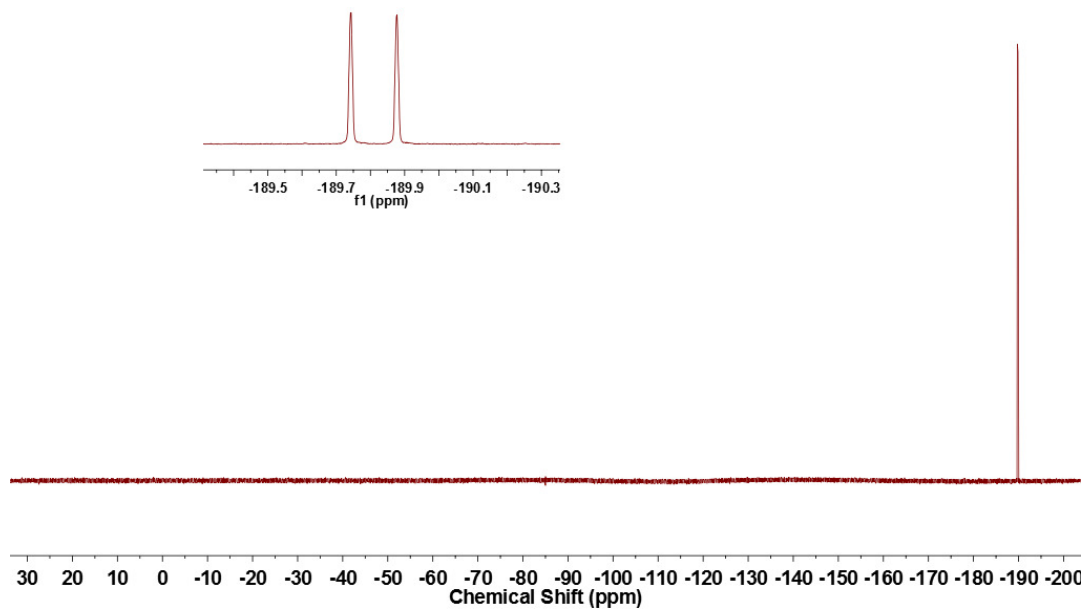



*N*-Boc-3-fluoro-6-trifluoromethyl-2-oxoindole (**1h**)

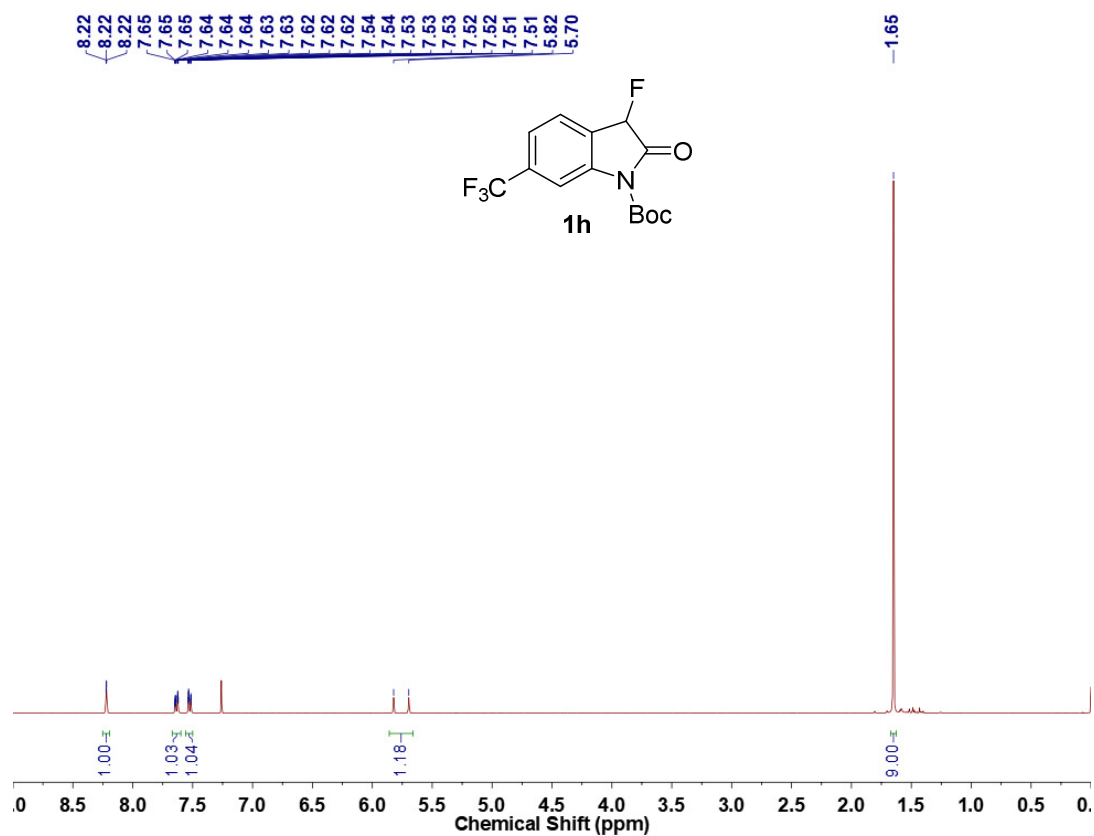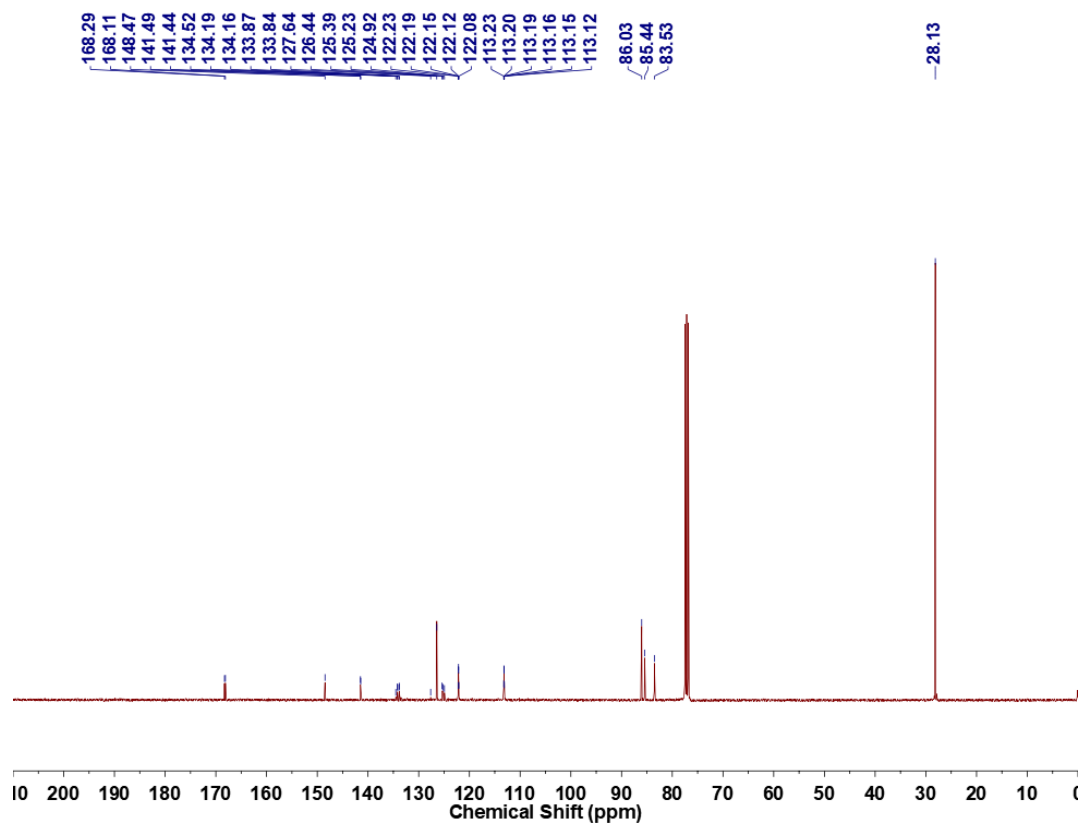

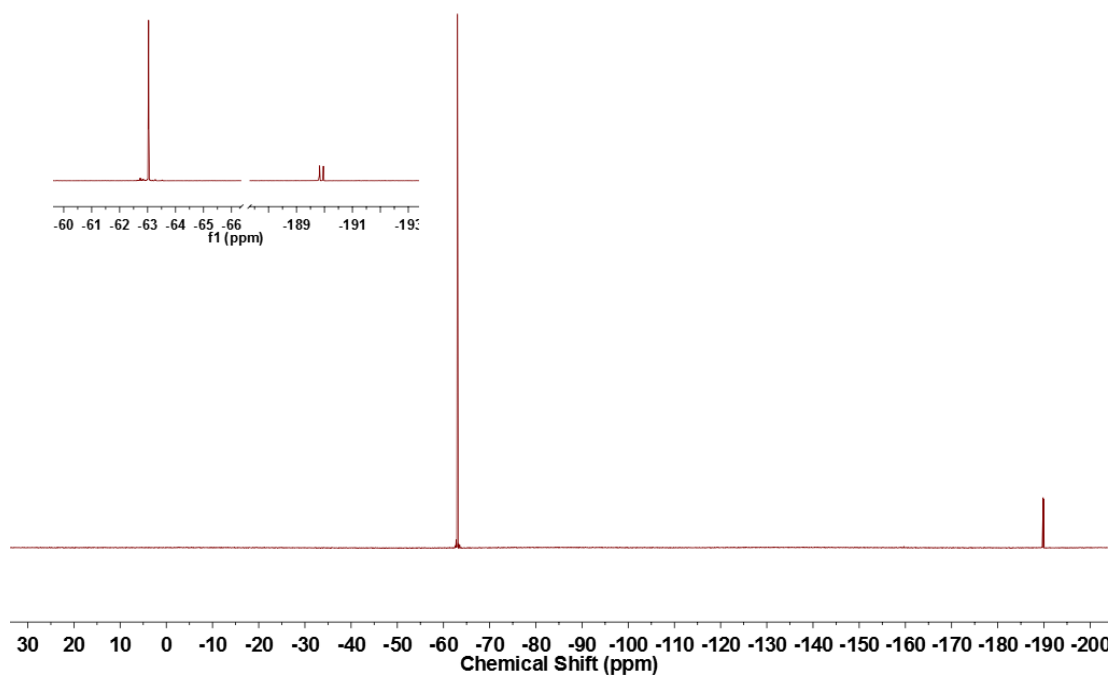

*N*-Boc-3-fluoro-5-nitro-2-oxindole (**1i**)

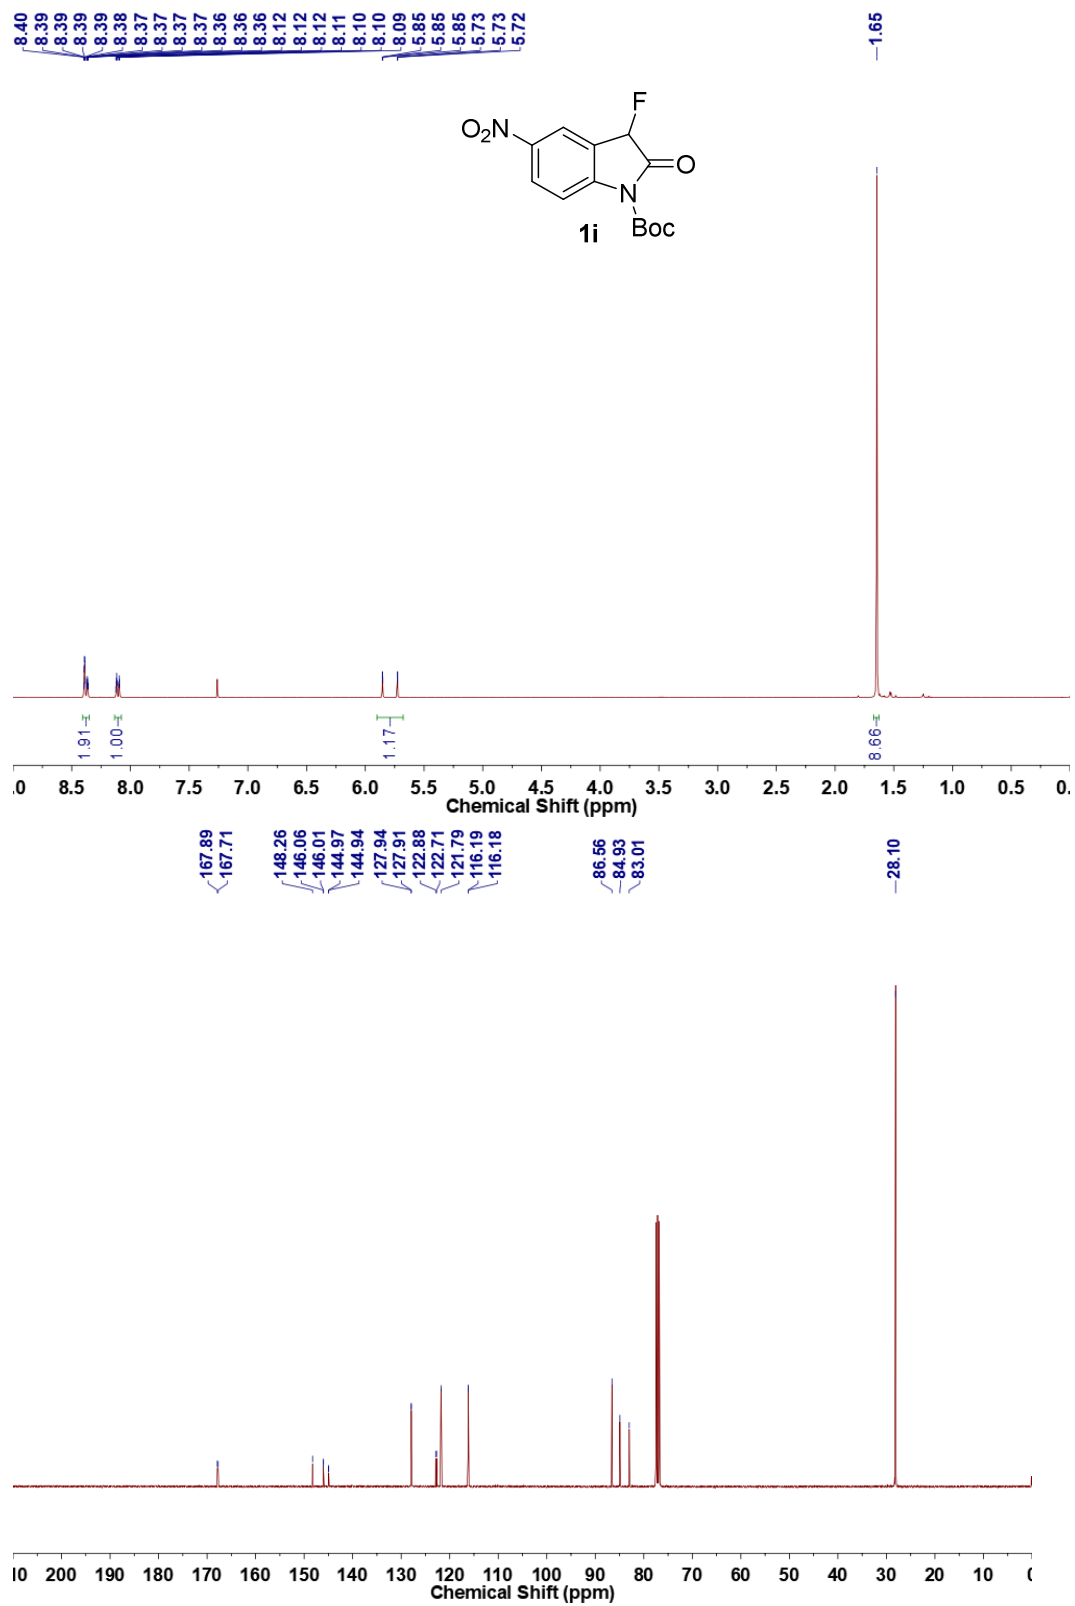

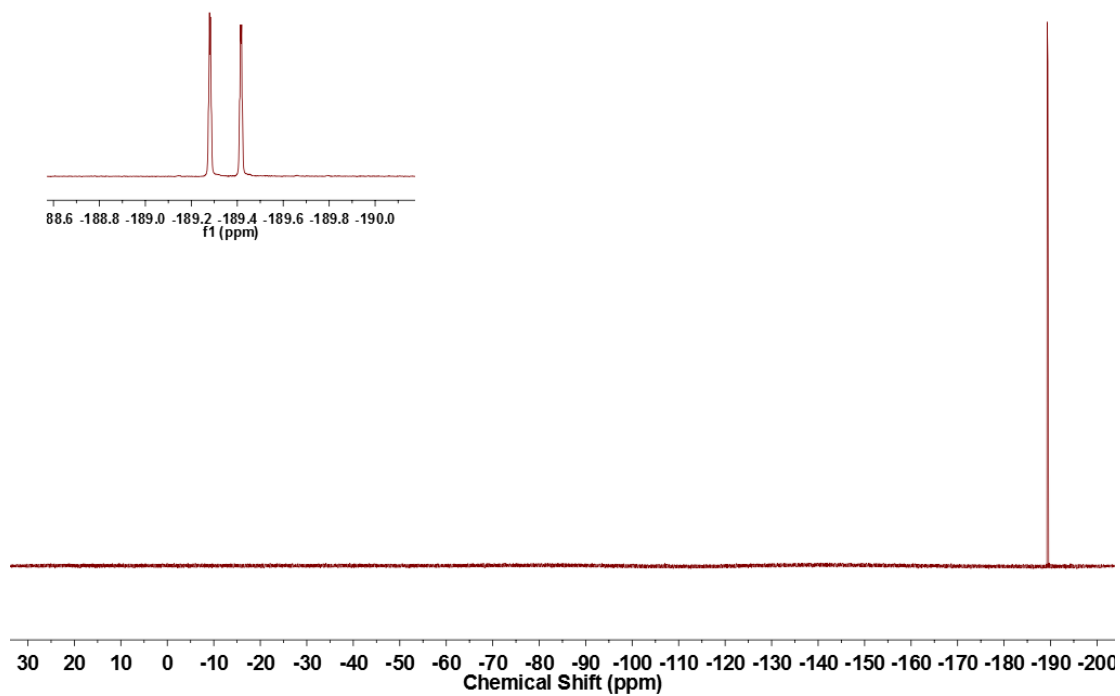

1-Fluoro-2-tetralone (**6**)

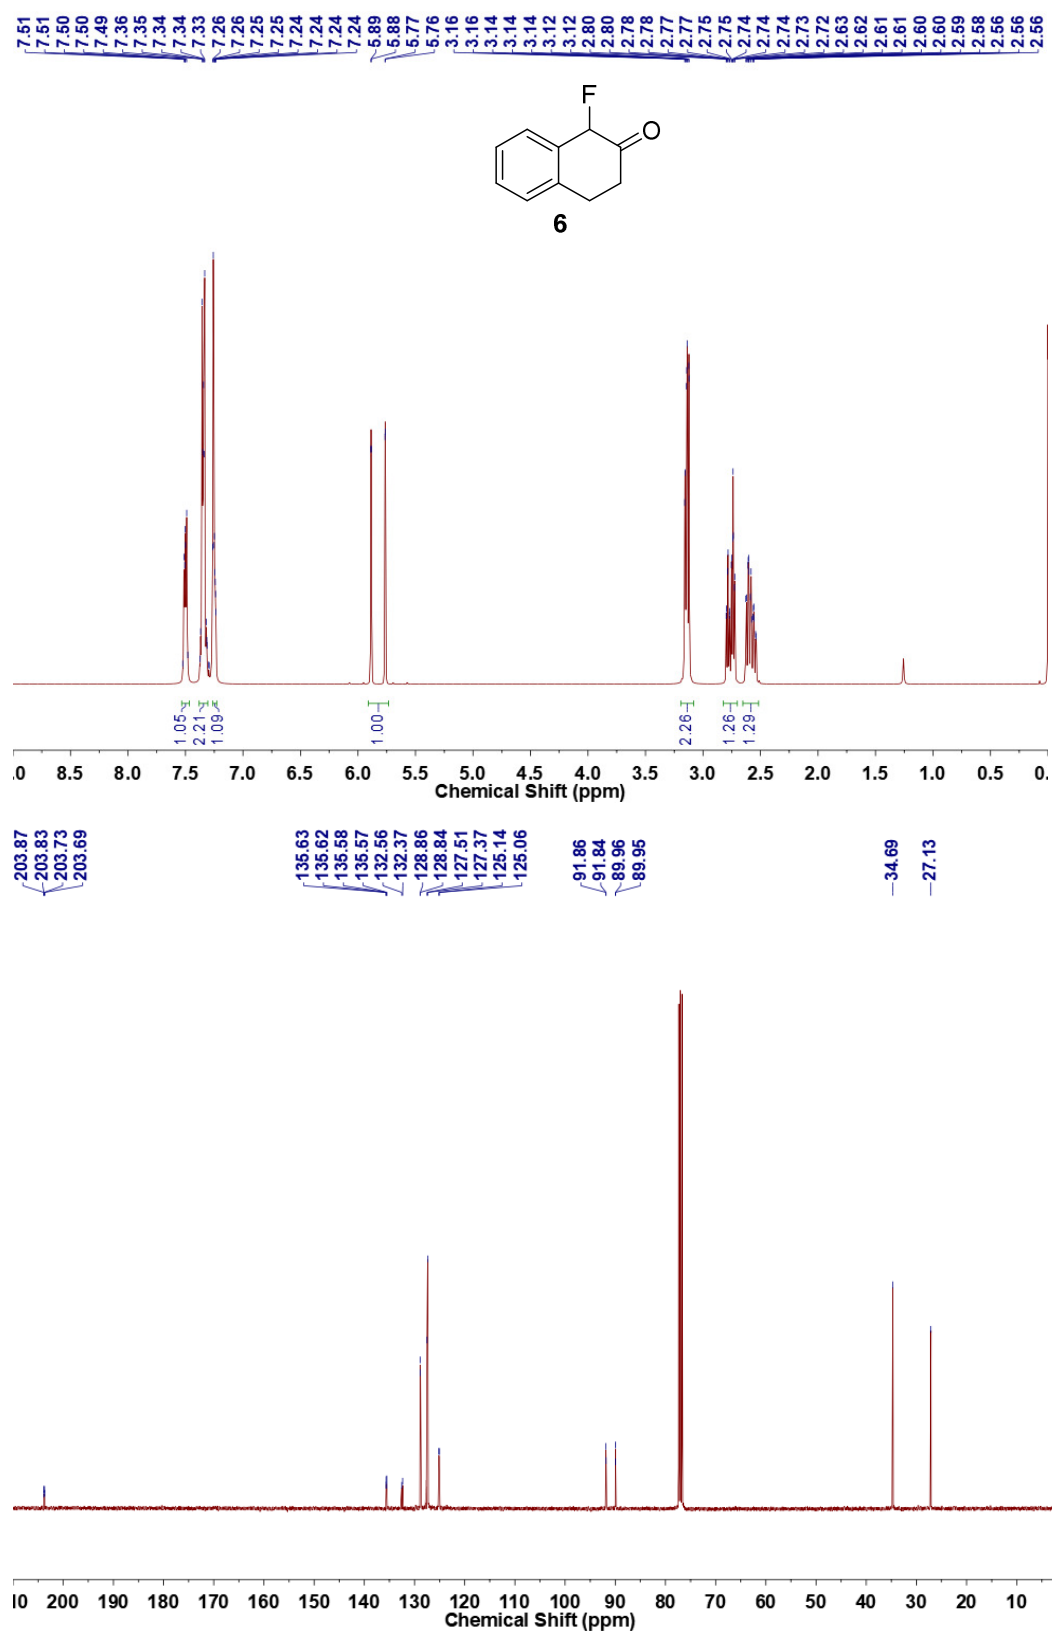

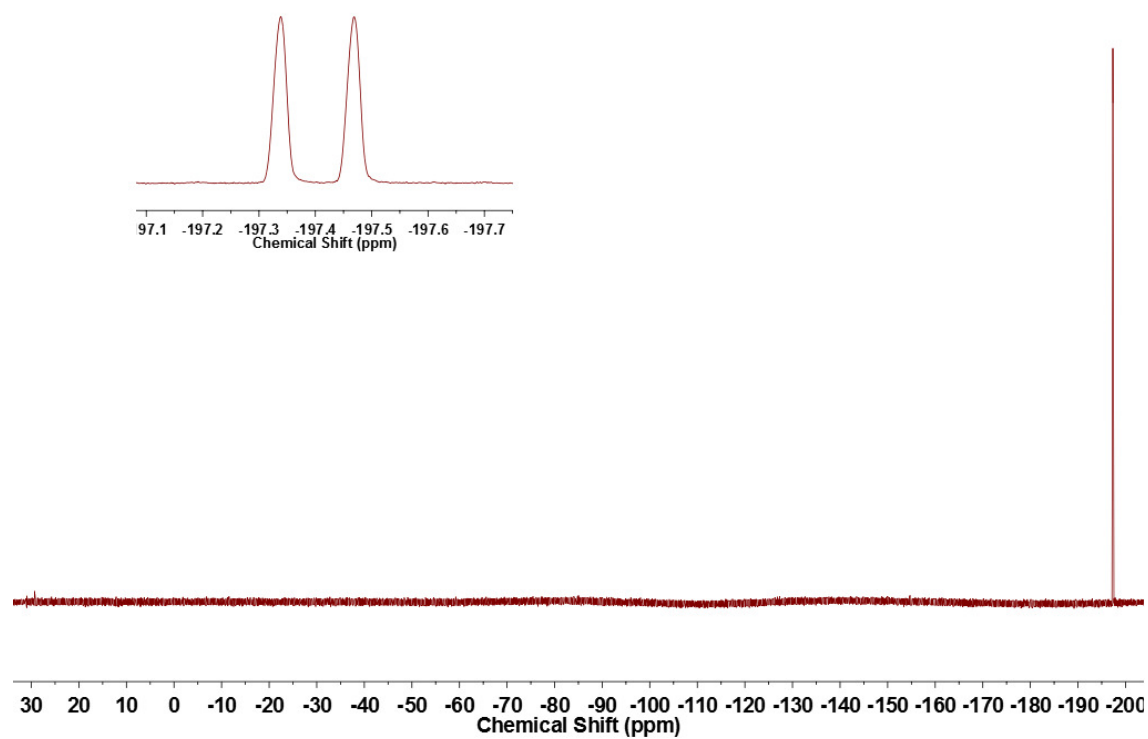



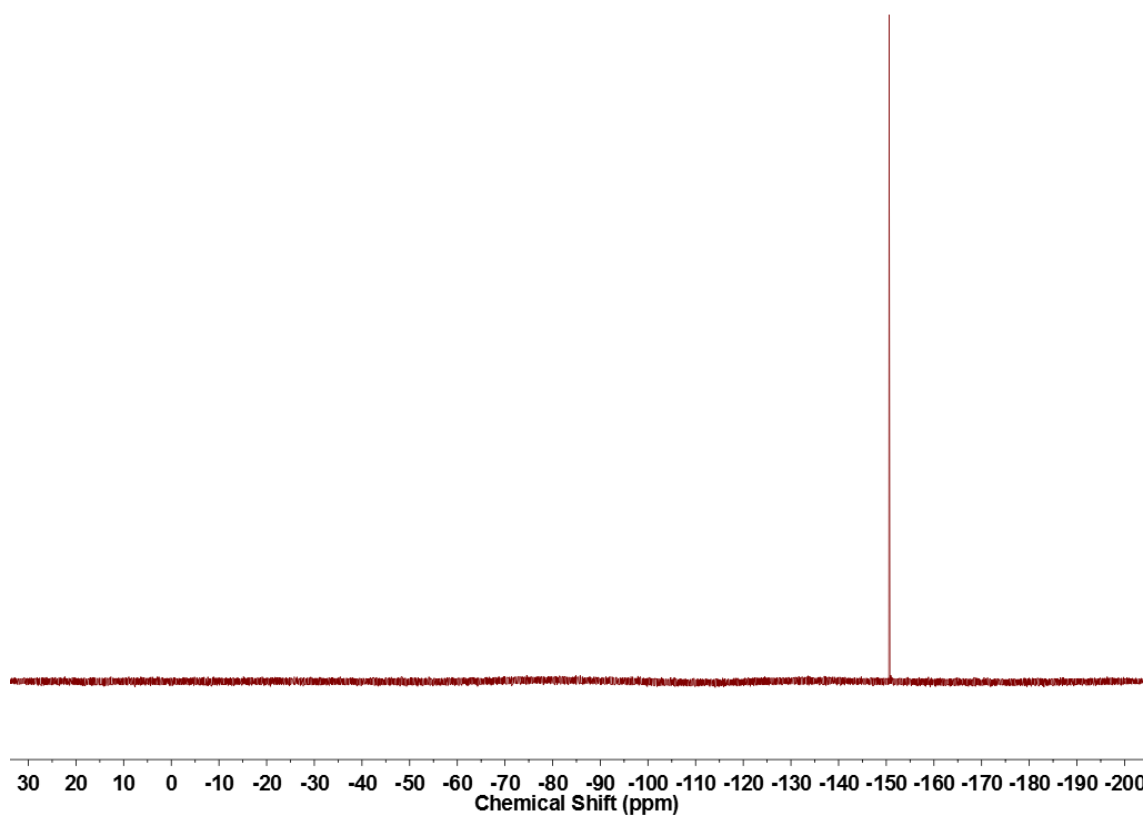



*N*-Boc-(*S*)-3-fluoro-3-(*N*-Cbz-3-(nitromethyl)azetidin-3-yl)-2-oxoindole (**3b**)

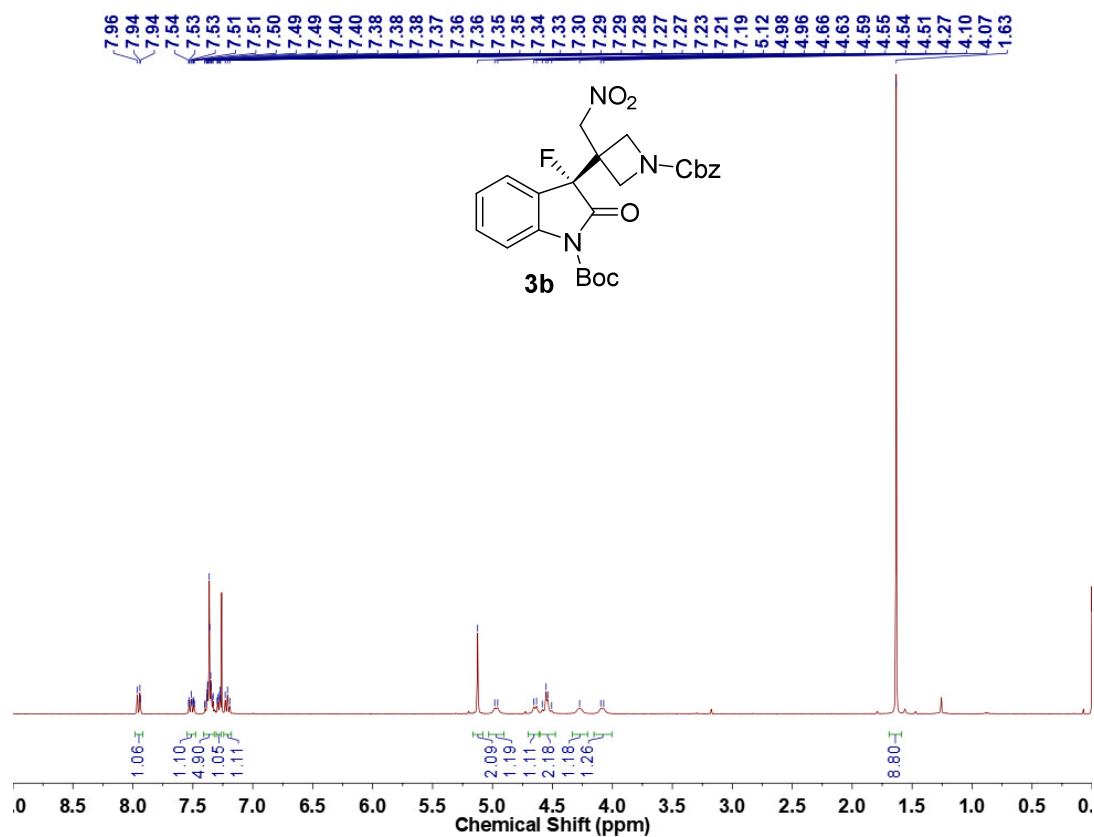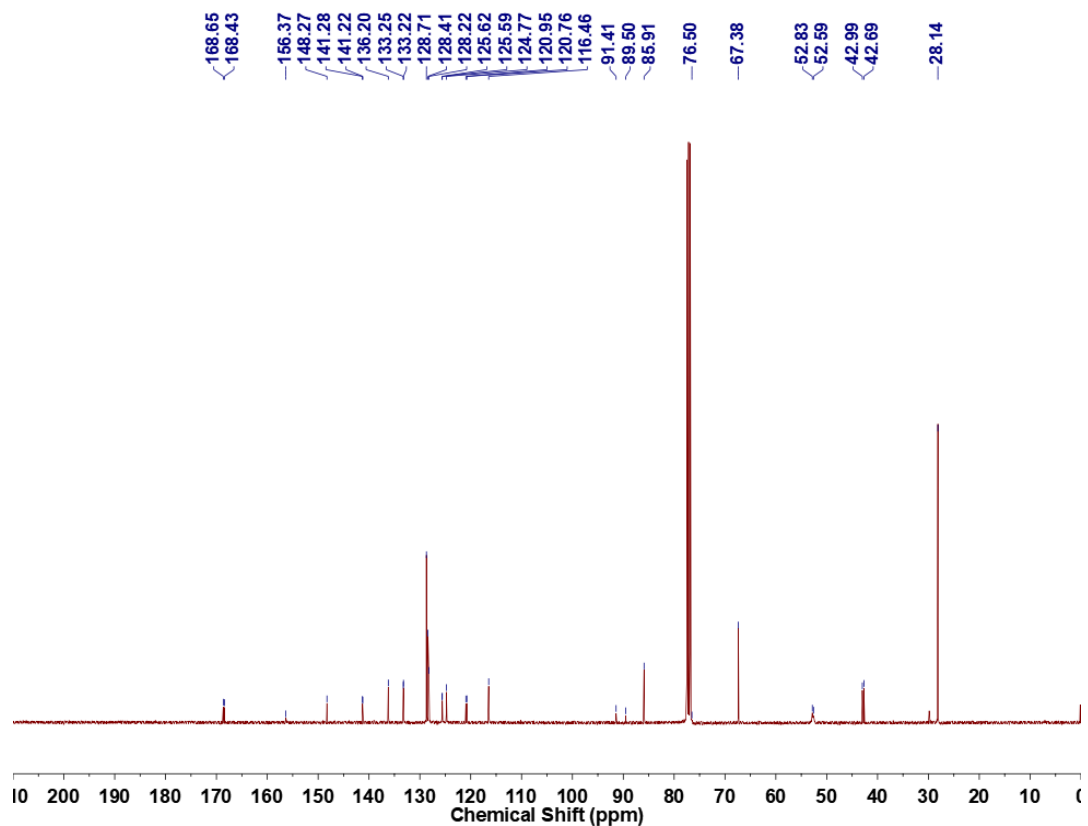

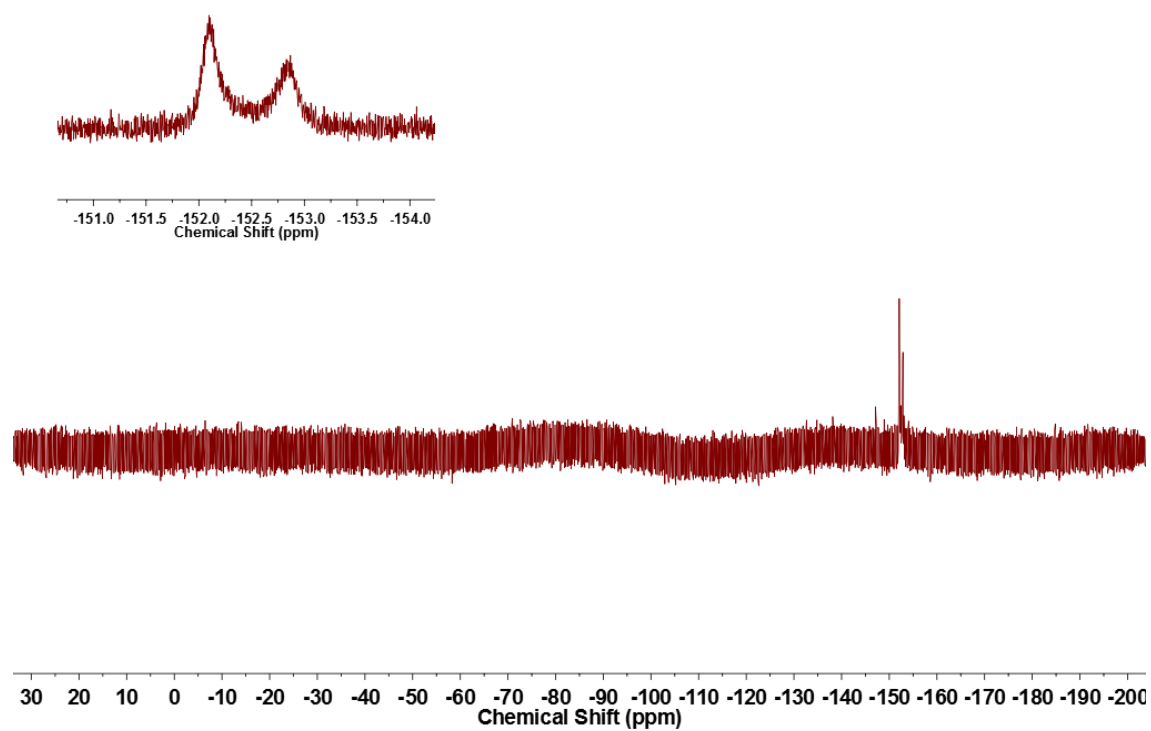

*N*-Boc-(*R*)-6-chloro-3-fluoro-3-(3-(nitromethyl)oxetan-3-yl)-2-oxoindole (**3c**)

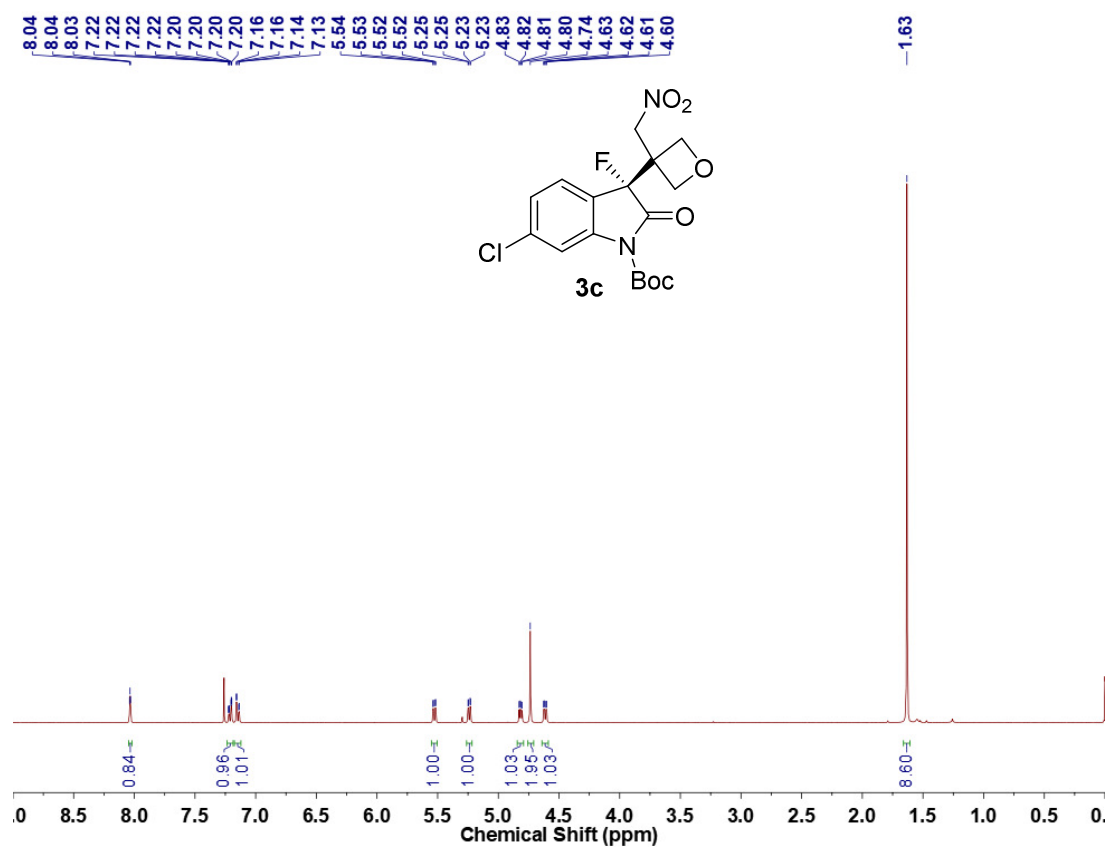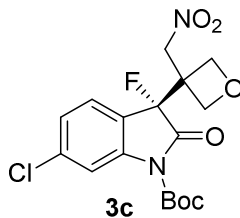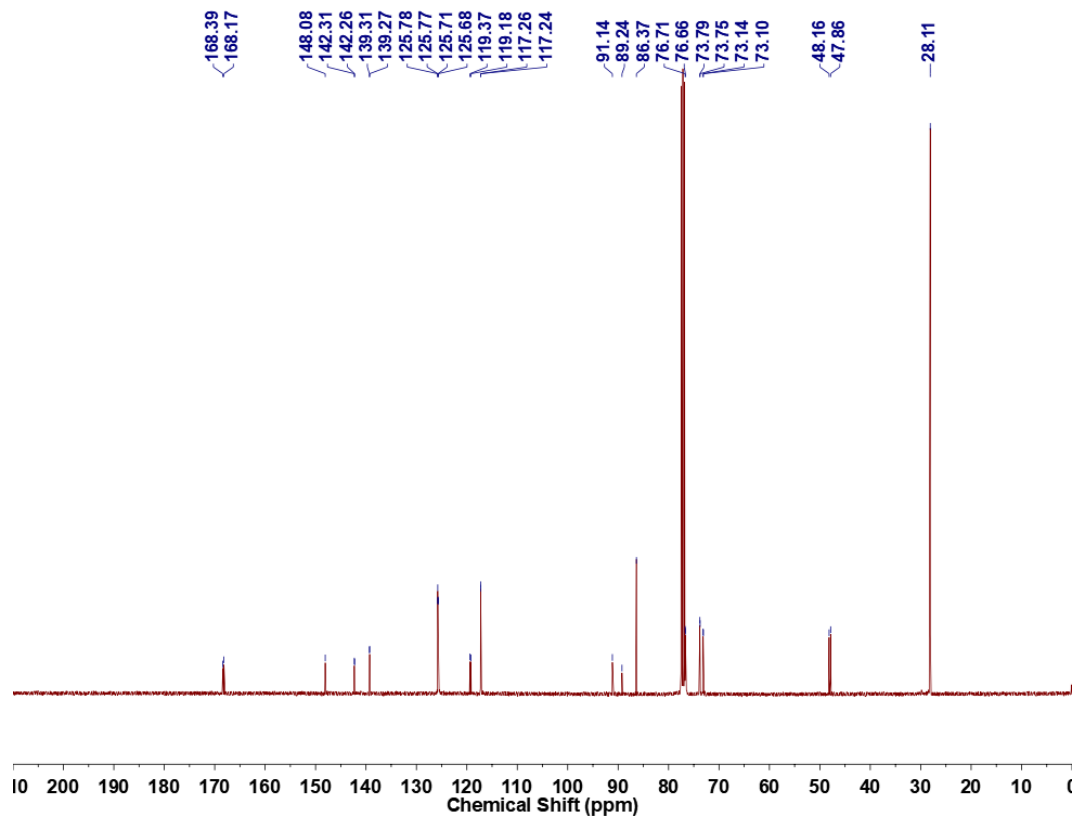

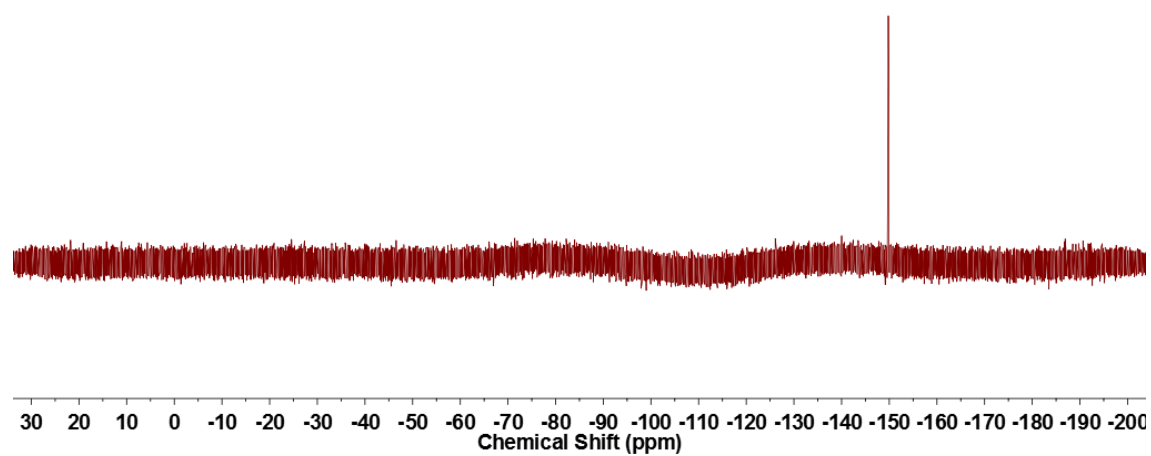

*N*-Boc-(*R*)-7-chloro-3-fluoro-3-(3-(nitromethyl)oxetan-3-yl)-2-oxoindole (**3d**)

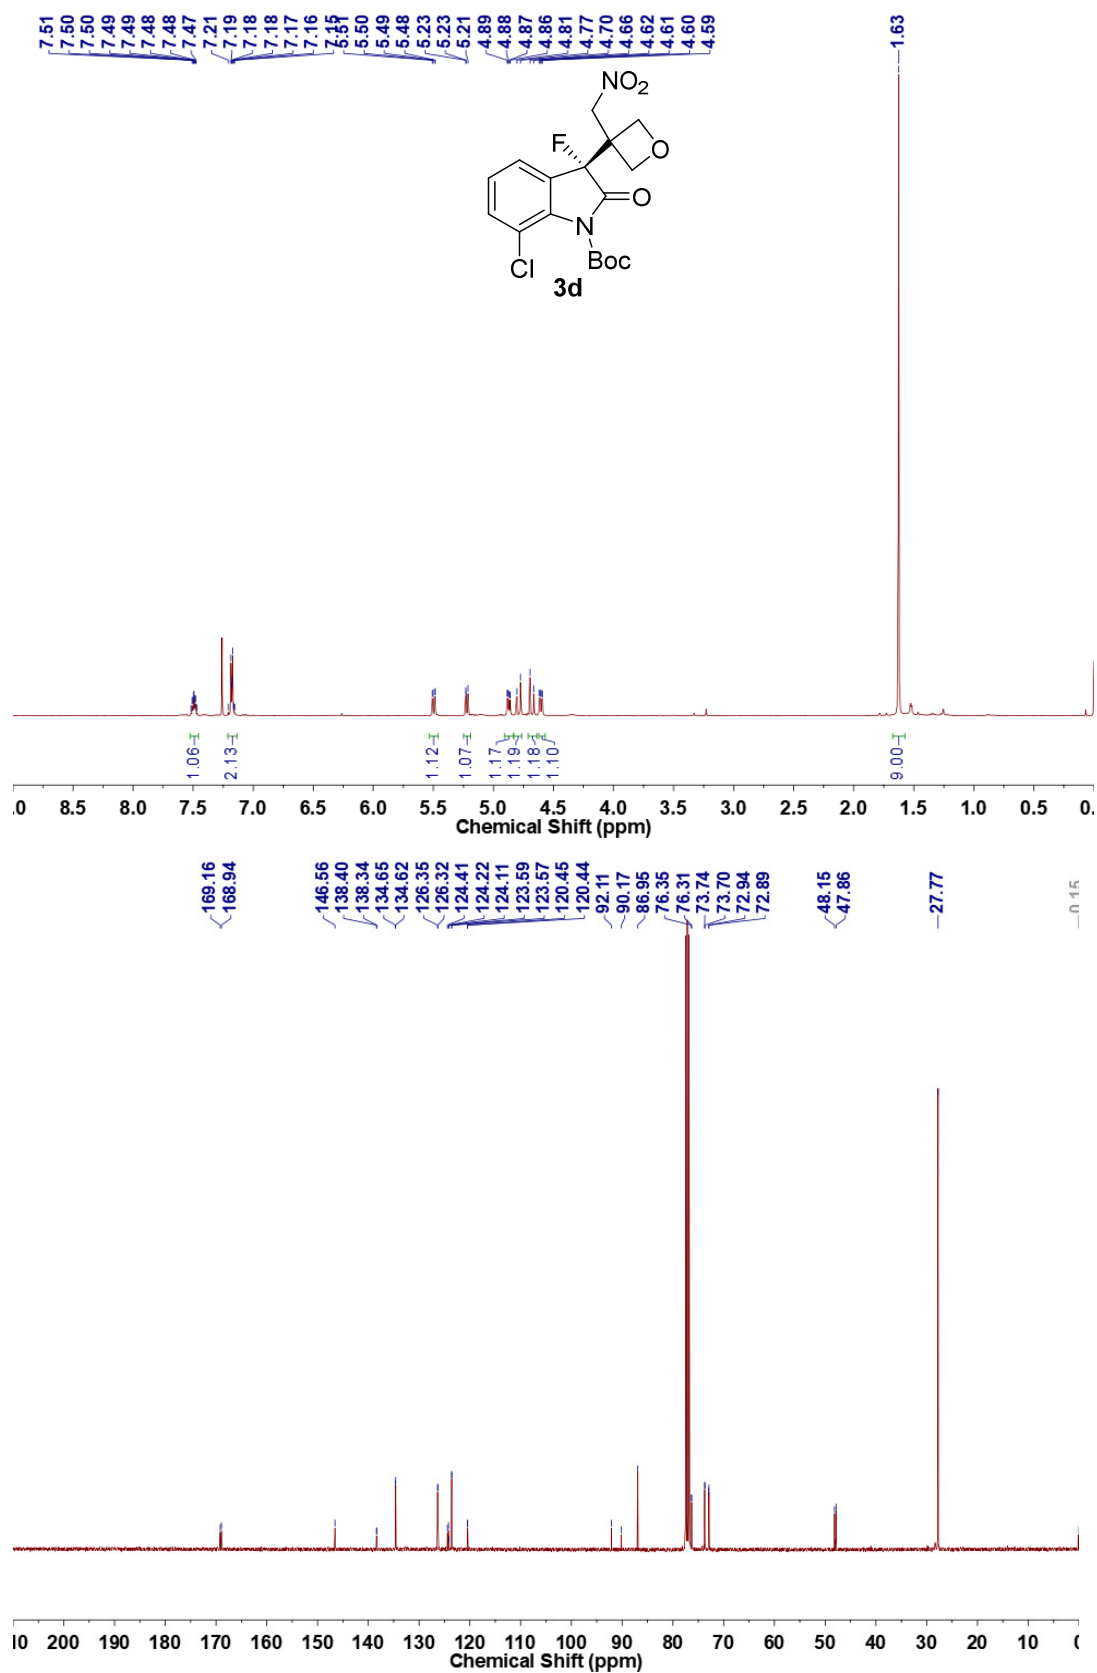

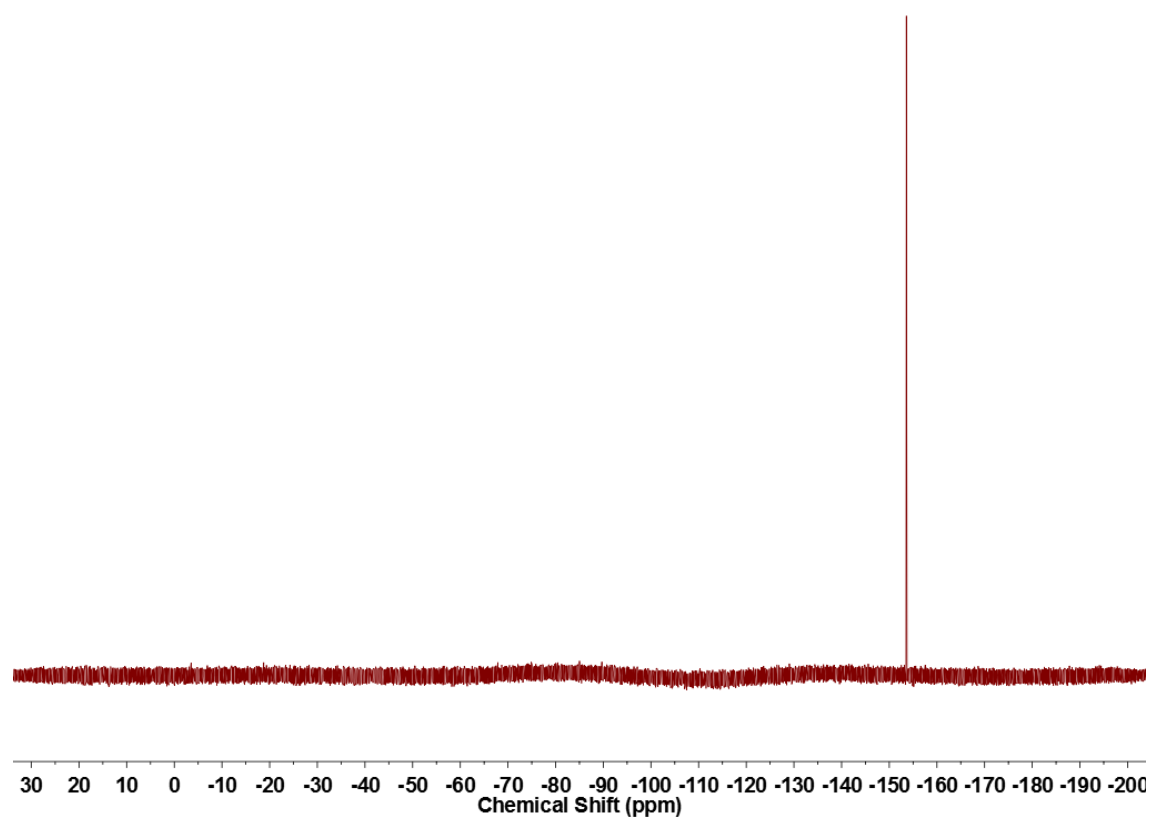

*N*-Boc-(*R*)-3,5-difluoro-3-(3-(nitromethyl)oxetan-3-yl)-2-oxindole (**3e**)

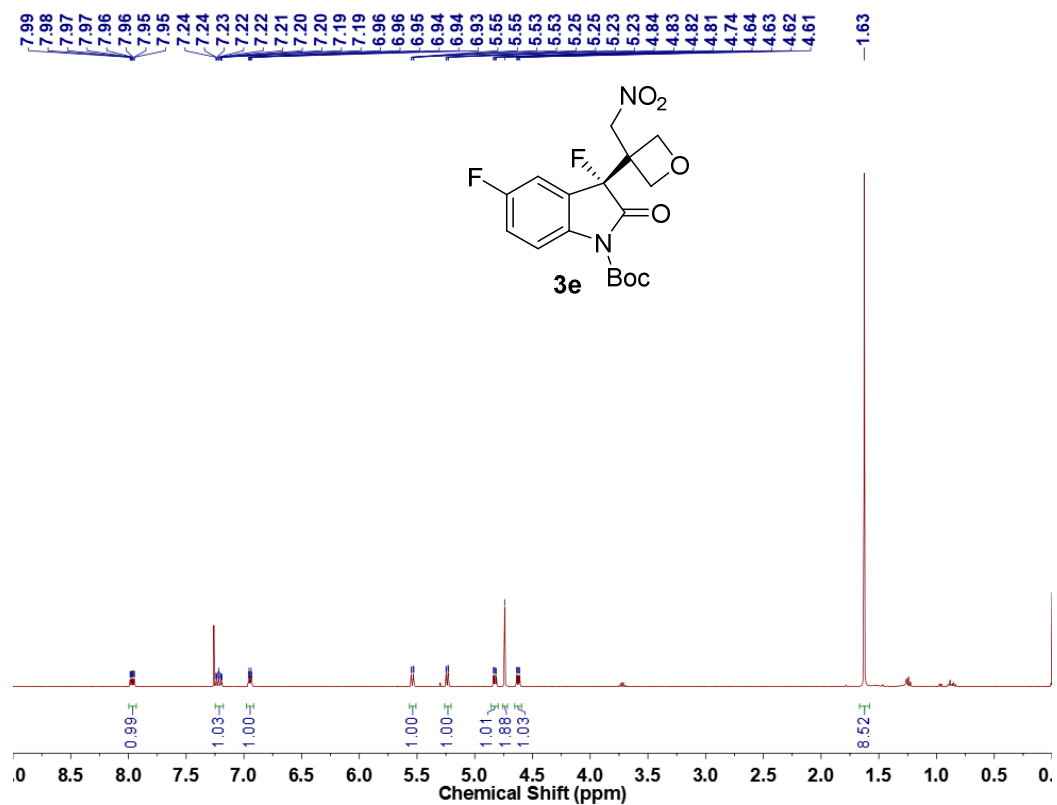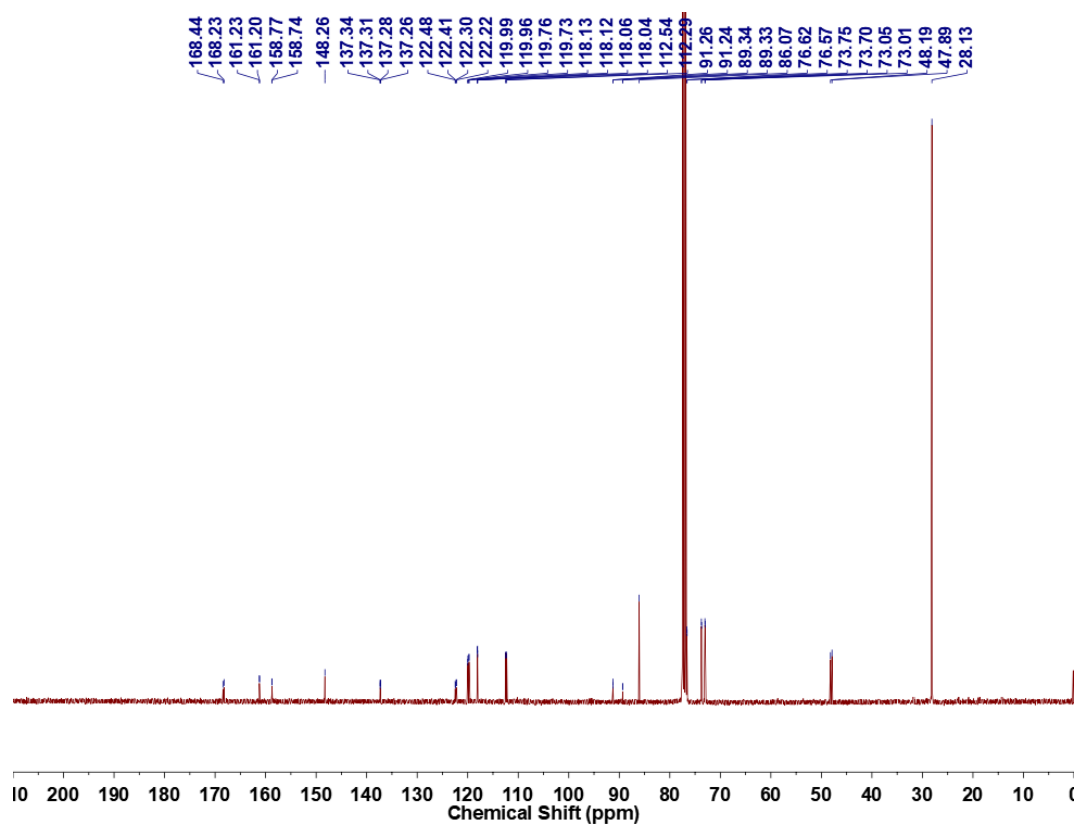

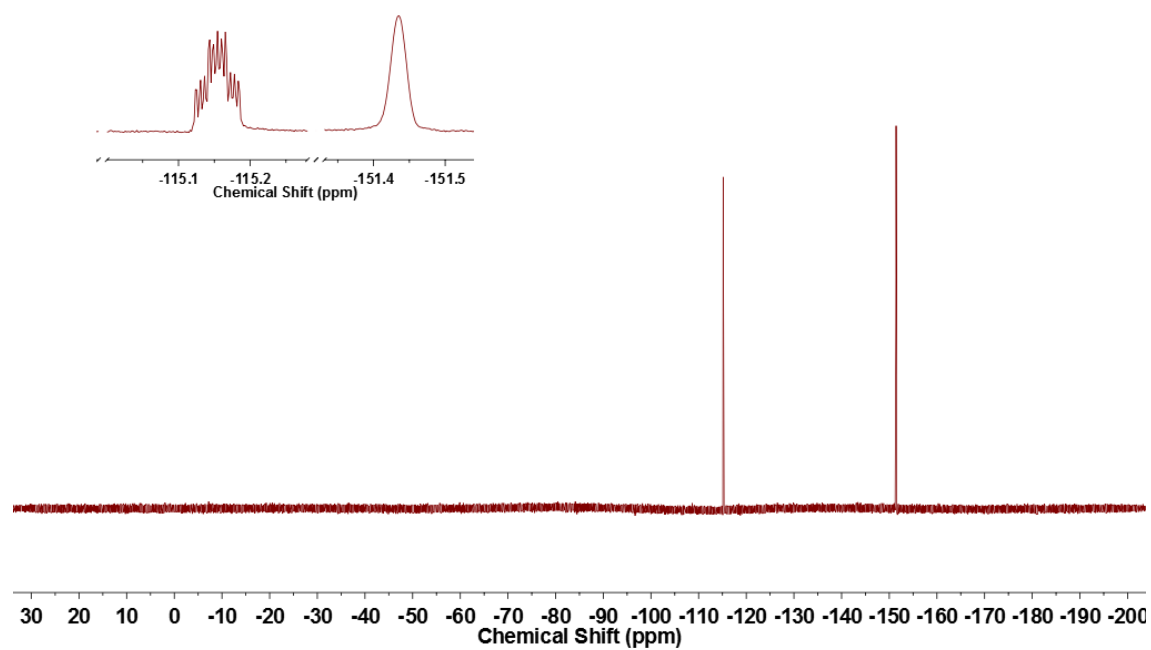



Chemical structure of **3f** is shown above the spectra. The structure is a 4-bromo-2-(4-(2-(2-nitroethoxy)-2-oxo-1,3-dioxol-5-yl)-1,3-dioxol-5-yl)-1H-indole-3-carboxamide derivative.

**<sup>1</sup>H NMR spectrum (CDCl<sub>3</sub>):**

- Chemical Shift (ppm): 7.89, 7.88, 7.88, 7.86, 7.86, 7.86, 7.65, 7.65, 7.64, 7.64, 7.63, 7.62, 7.62, 7.32, 7.32, 7.32, 7.31, 5.55, 5.54, 5.53, 5.52, 5.26, 5.24, 4.80, 4.79, 4.78, 4.76, 4.73, 4.69, 4.65, 4.64, 4.63, 4.62, 1.62.
- Integration: 0.96, 0.97, 0.89, 1.00, 1.00, 1.96, 1.02, 1.07, 8.45.

**<sup>13</sup>C NMR spectrum (CDCl<sub>3</sub>):**

- Chemical Shift (ppm): 168.02, 167.80, 148.13, 140.38, 140.32, 136.04, 136.00, 127.81, 123.00, 122.81, 118.42, 118.38, 118.11, 118.10, 91.11, 89.20, 86.23, 76.67, 73.64, 73.60, 73.16, 73.11, 48.18, 47.88, 28.11.

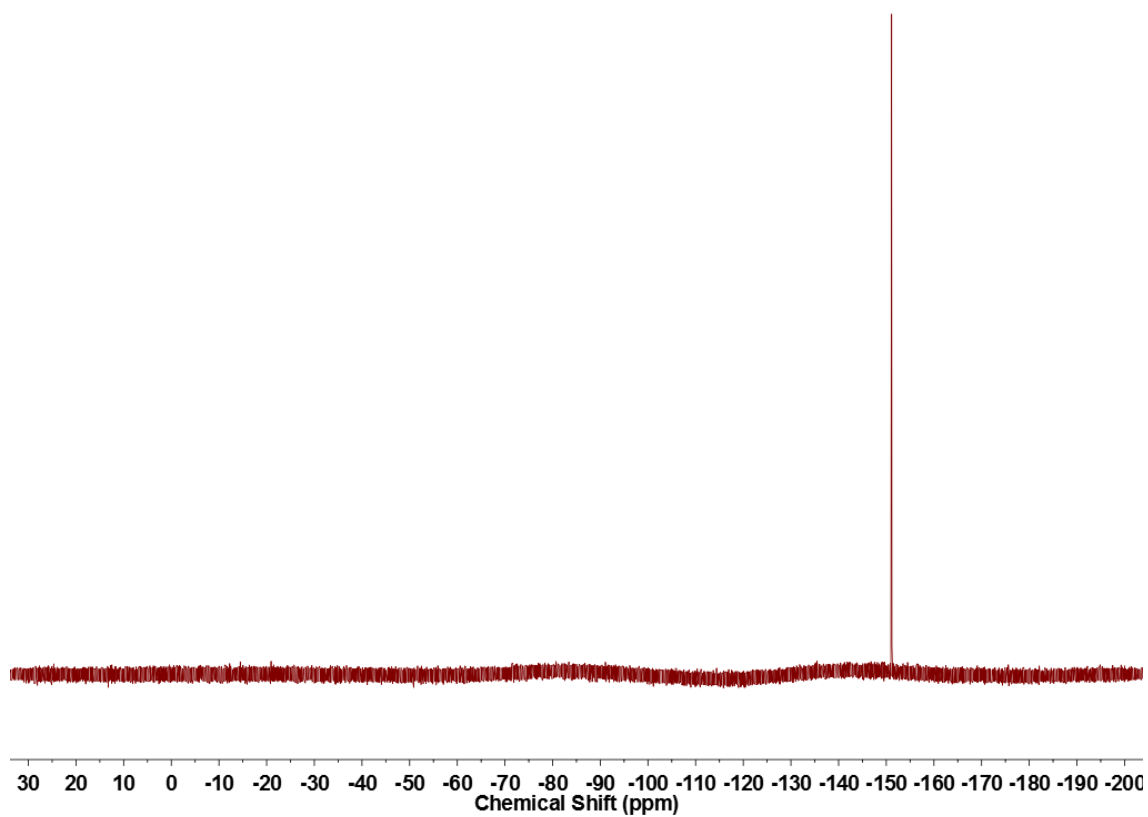

Methyl *N*-Boc-(R)-3-fluoro-3-(3-(nitromethyl)oxetan-3-yl)-2-oxindole-6-carboxylate (**3g**)

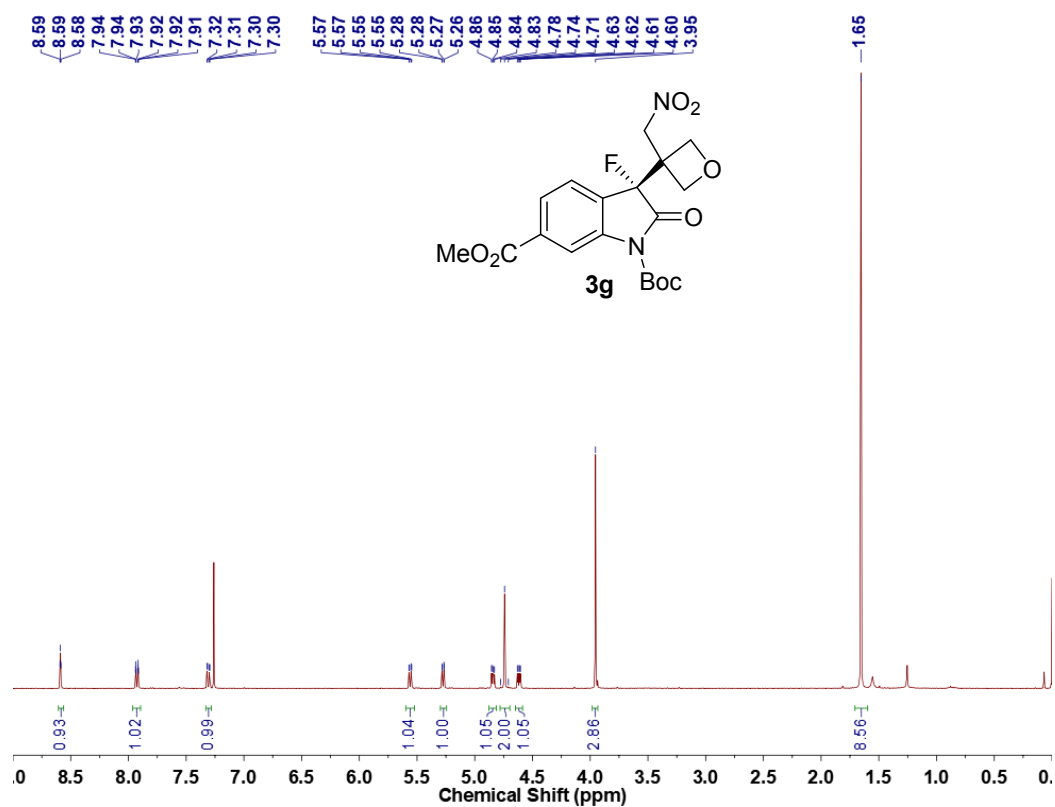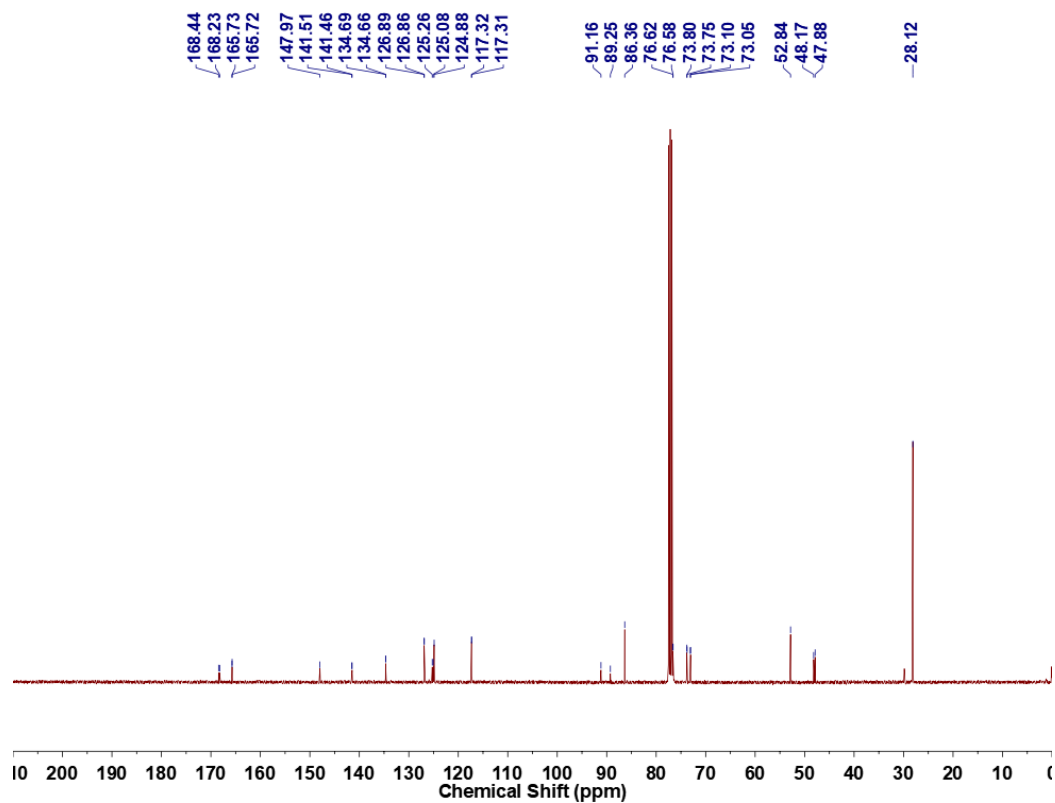

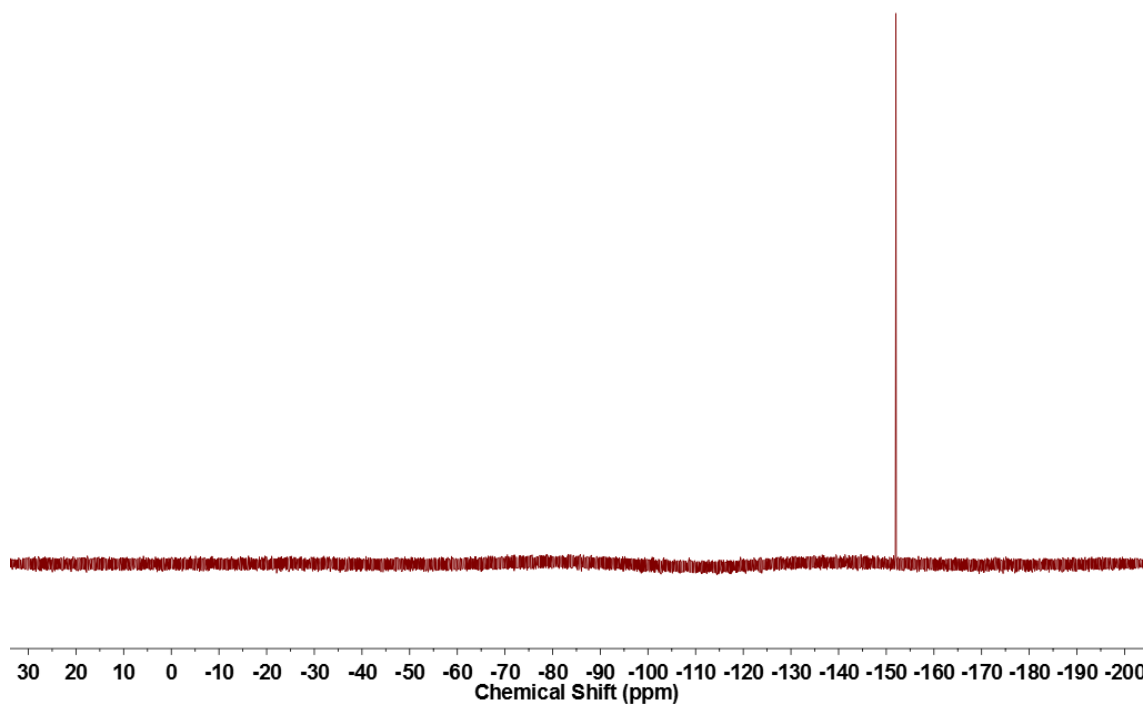

*N*-Boc-(*R*)-6-trifluoromethyl-3-fluoro-3-(3-(nitromethyl)oxetan-3-yl)-2-oxindole (**3h**)

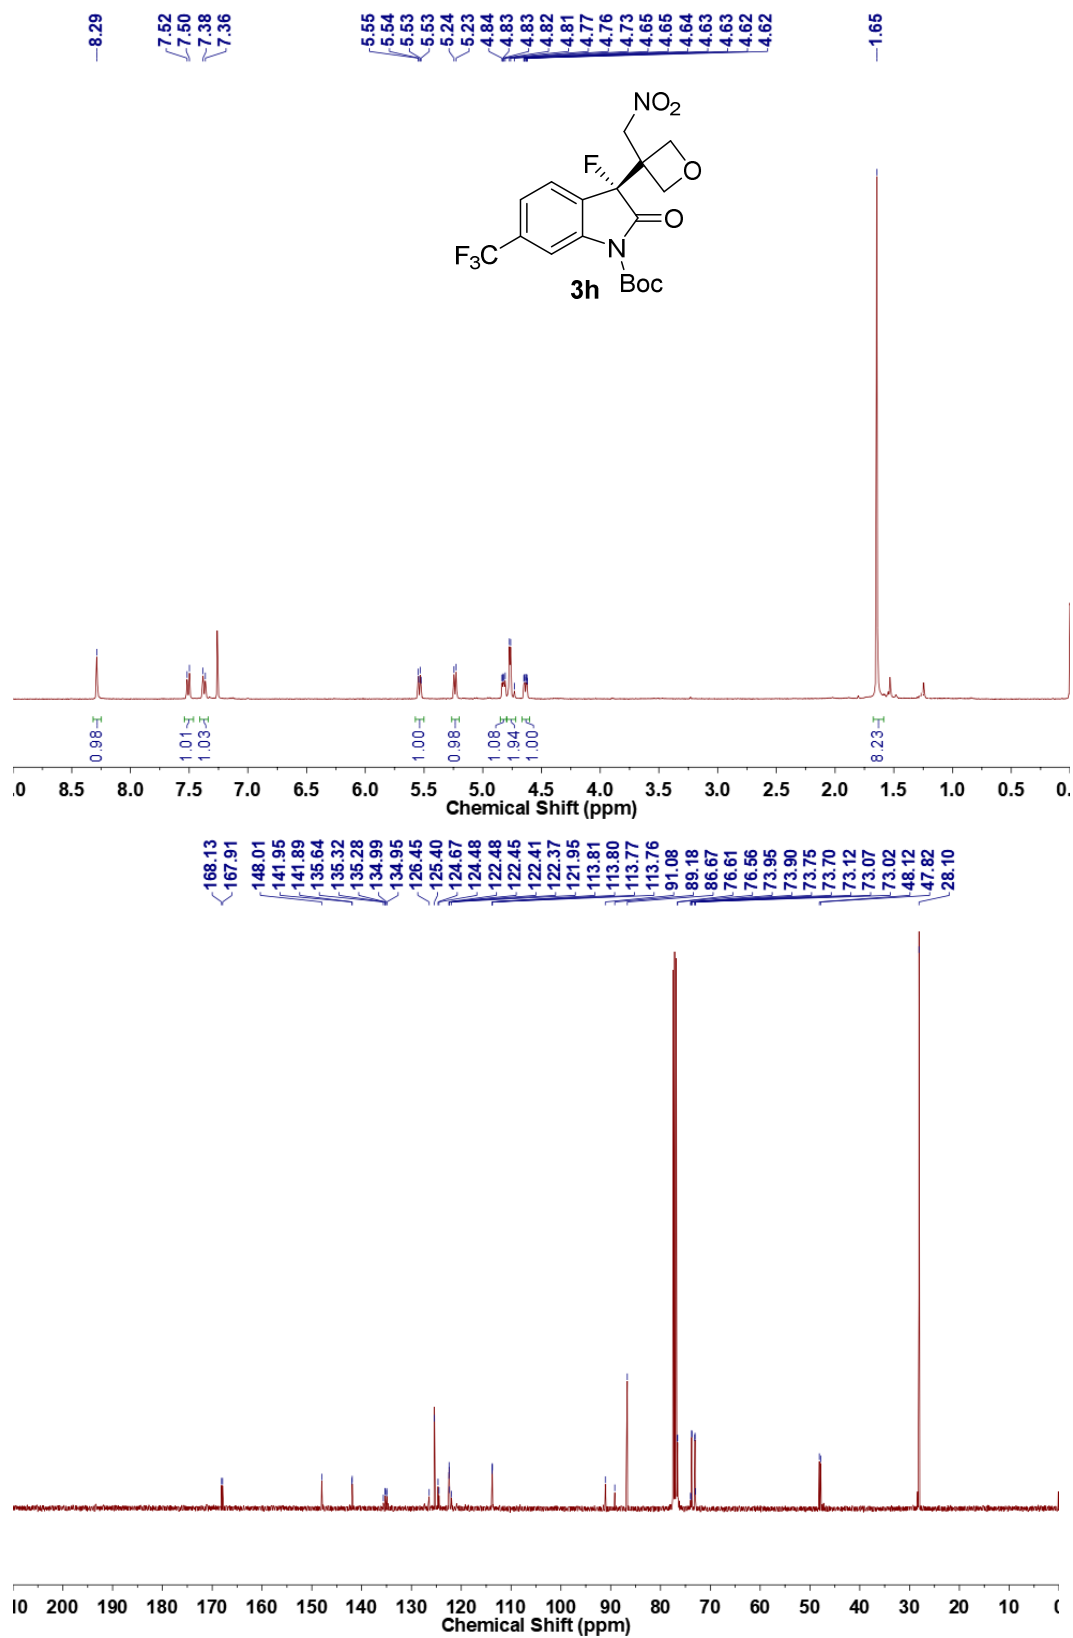

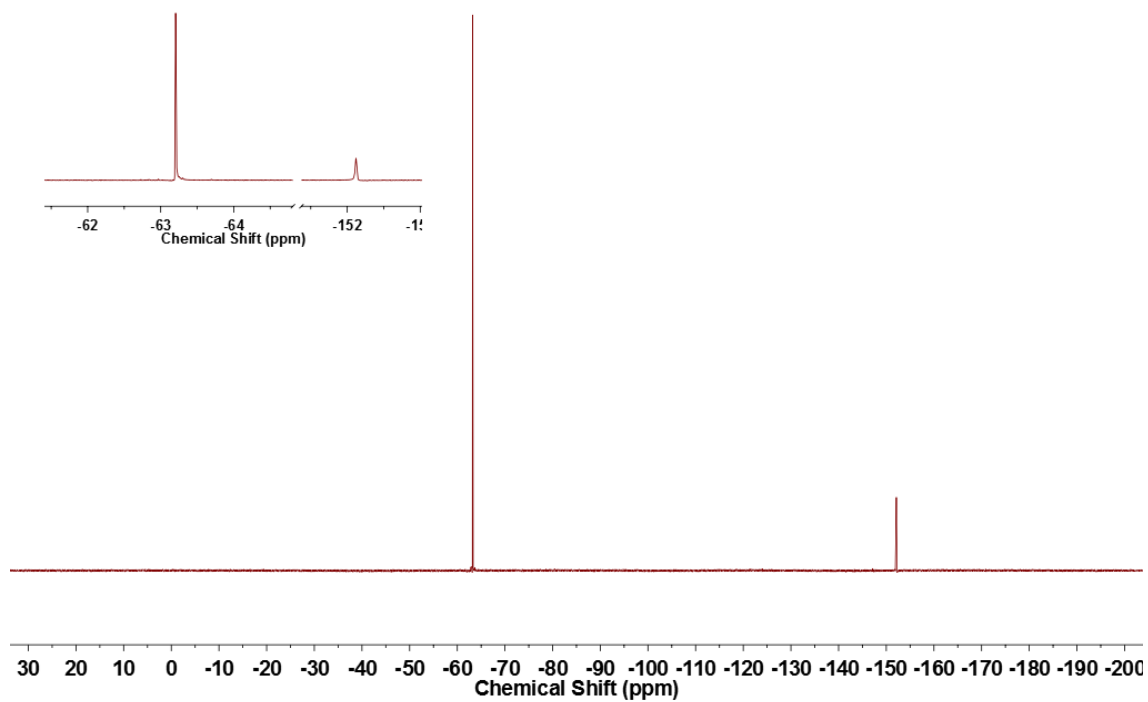

*N*-Boc-(*R*)-5-nitro-3-fluoro-3-(3-(nitromethyl)oxetan-3-yl)-2-oxindole (**3i**)

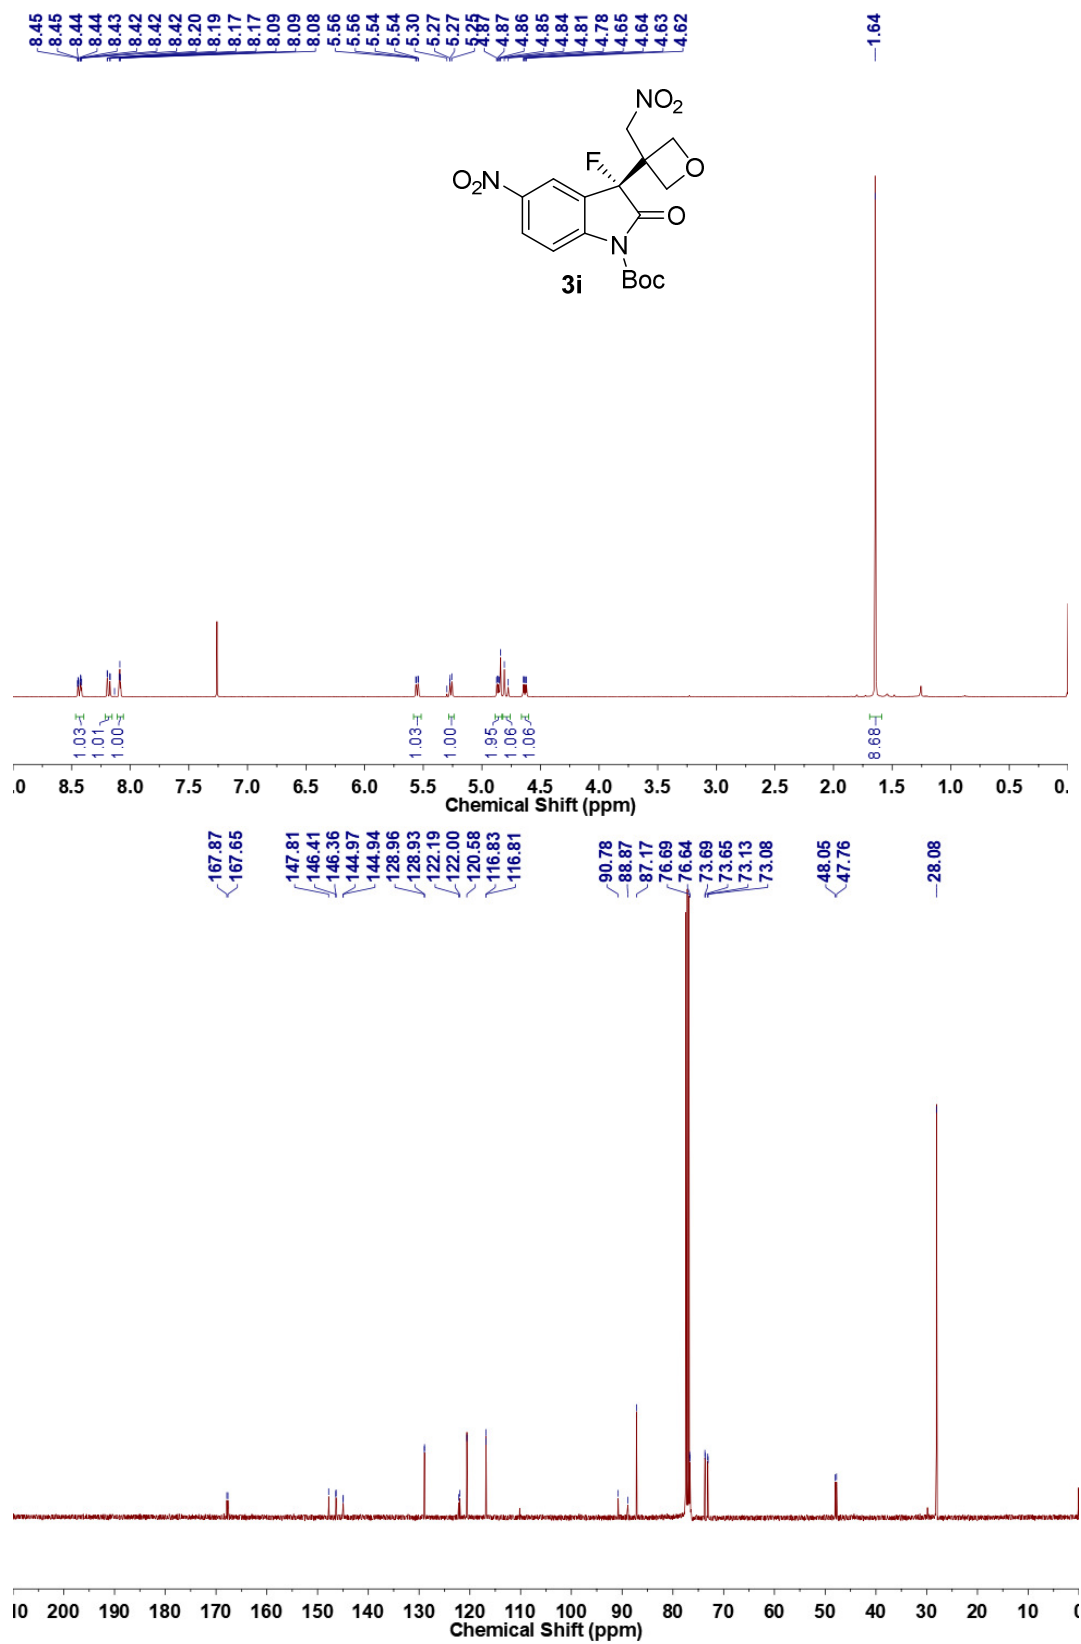

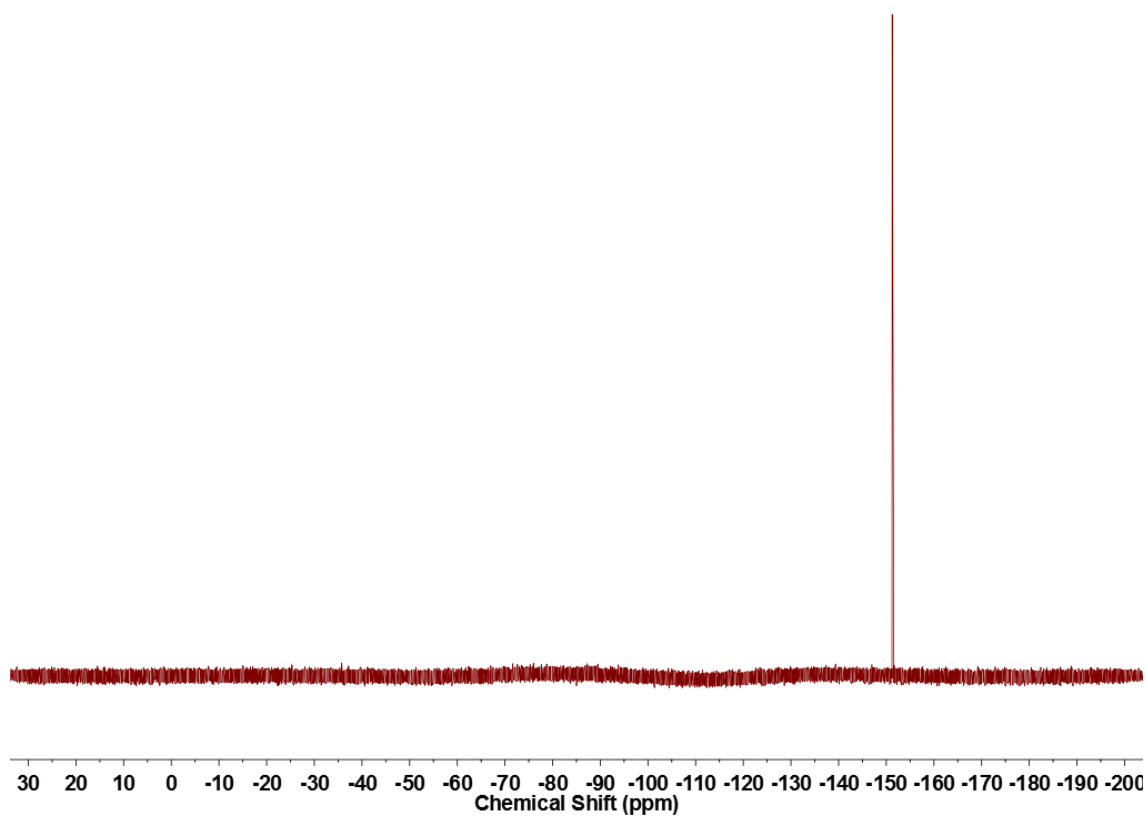



*N*-Boc-(*R*)-5-methoxy-3-fluoro-3-(3-(nitromethyl)oxetan-3-yl)-2-oxindole (**3j**)

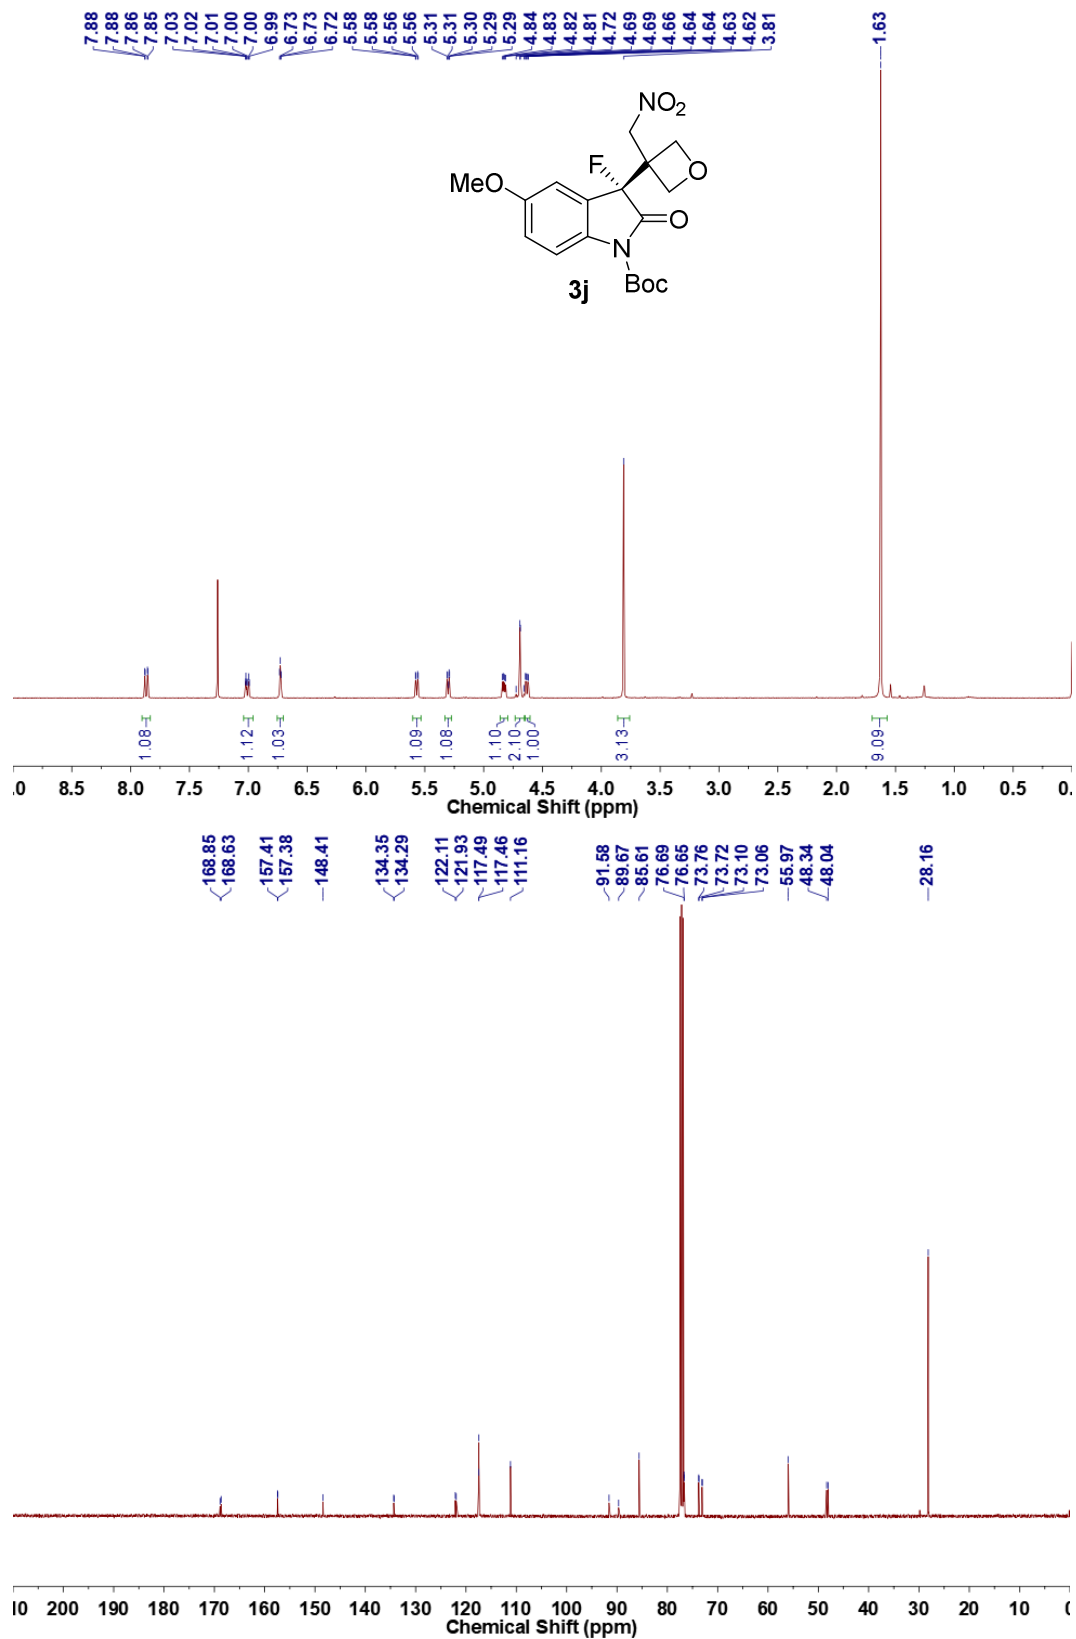

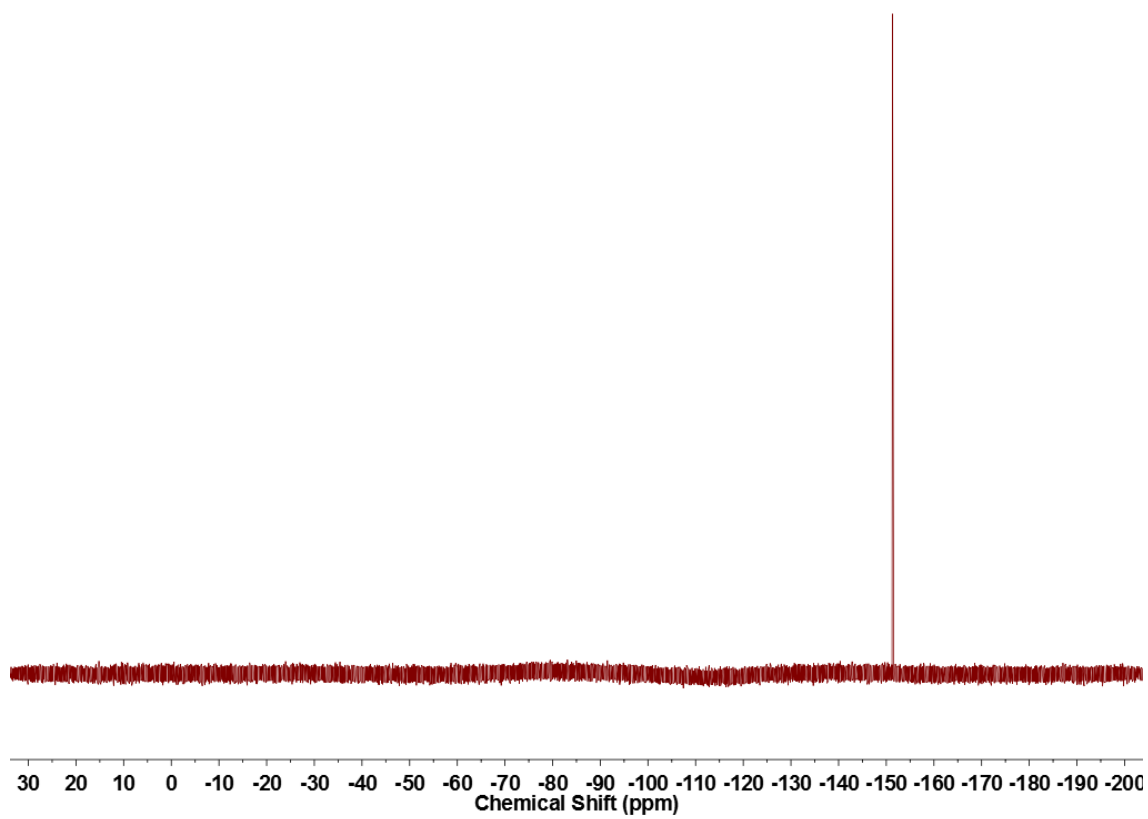

*N*-Boc-(*S*)-3-fluoro-3-(*N*-Boc-3-(nitromethyl)azetidin-3-yl)-2-oxindole (**3k**)

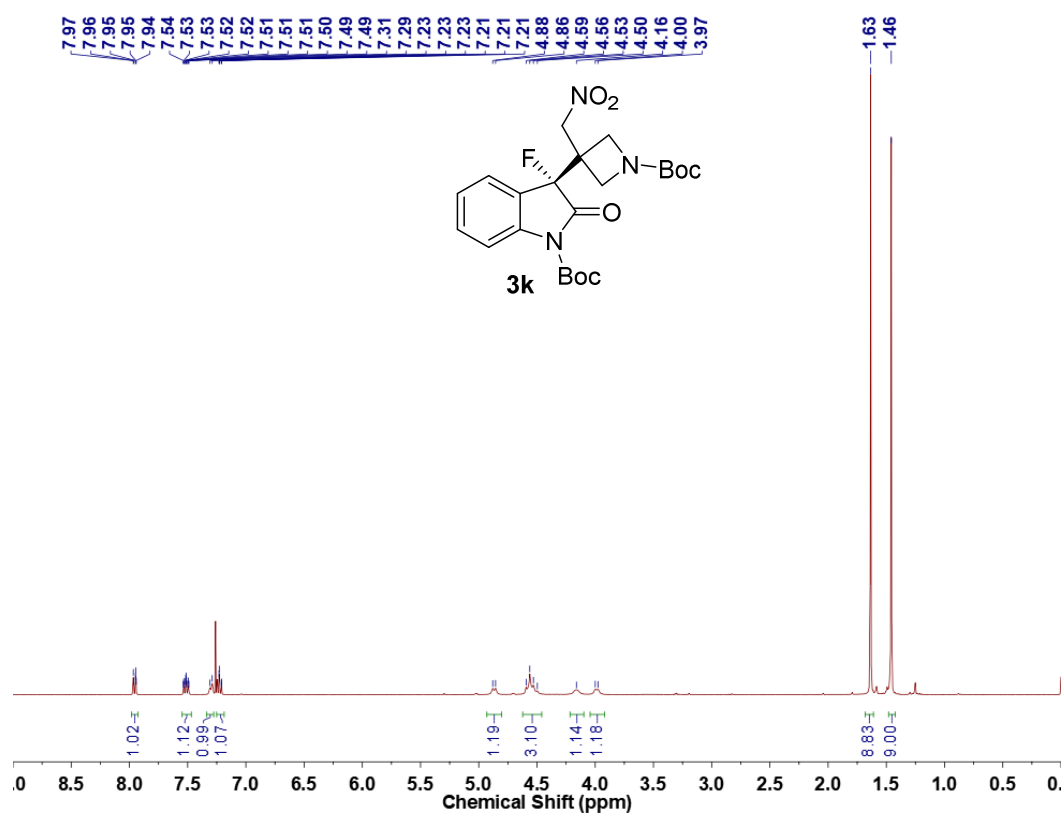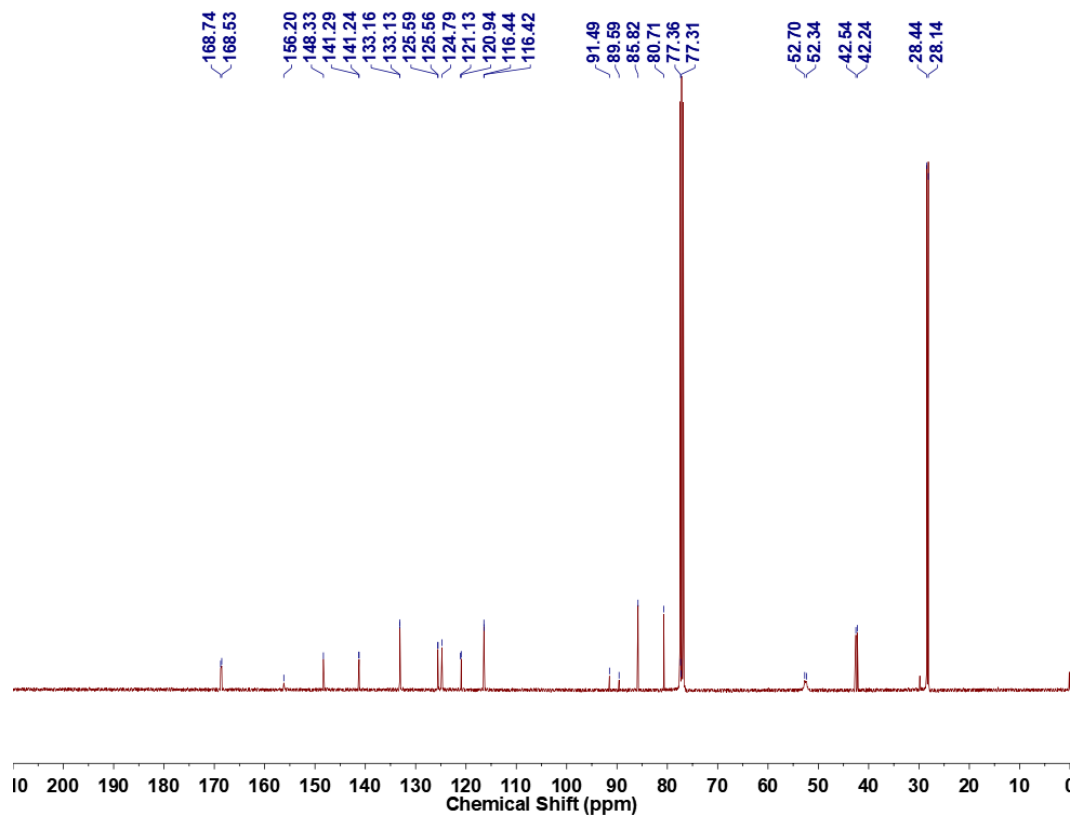

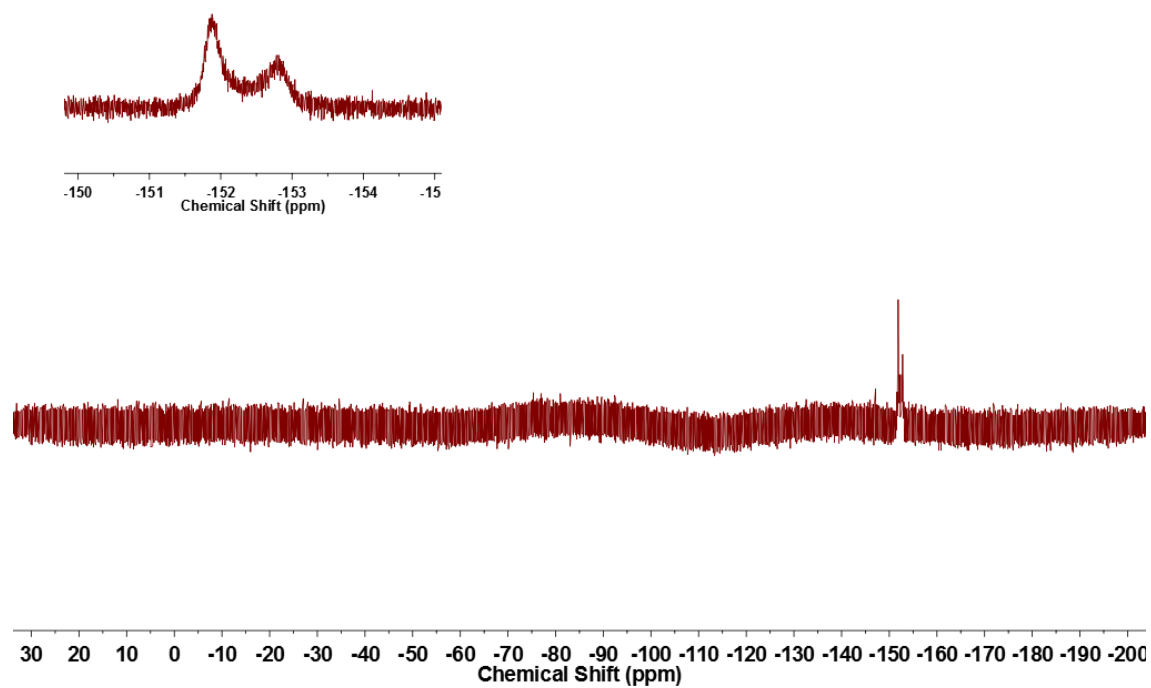

Chemical structure of compound **3I** is shown above the spectra.

**<sup>1</sup>H NMR** (400 MHz, CDCl<sub>3</sub>) peaks (ppm): 7.89, 7.89, 7.87, 7.87, 7.65, 7.65, 7.64, 7.63, 7.63, 7.62, 7.40, 7.40, 7.39, 4.84, 4.82, 4.65, 4.62, 4.54, 4.52, 4.51, 4.50, 4.50, 4.12, 4.00, 3.98, 1.62, 1.47.

**<sup>13</sup>C NMR** (100 MHz, CDCl<sub>3</sub>) peaks (ppm): 167.90, 167.68, 156.11, 148.15, 140.36, 140.30, 136.08, 136.05, 127.77, 123.05, 122.86, 118.45, 118.42, 118.14, 91.16, 89.24, 86.23, 80.89, 77.08, 52.60, 52.45, 42.41, 42.34, 42.11, 42.04, 28.46, 28.12.

Integration values for <sup>1</sup>H NMR peaks (from left to right): 1.14, 1.09, 1.02, 1.15, 1.12, 2.03, 1.13, 1.15, 9.00, 9.00.

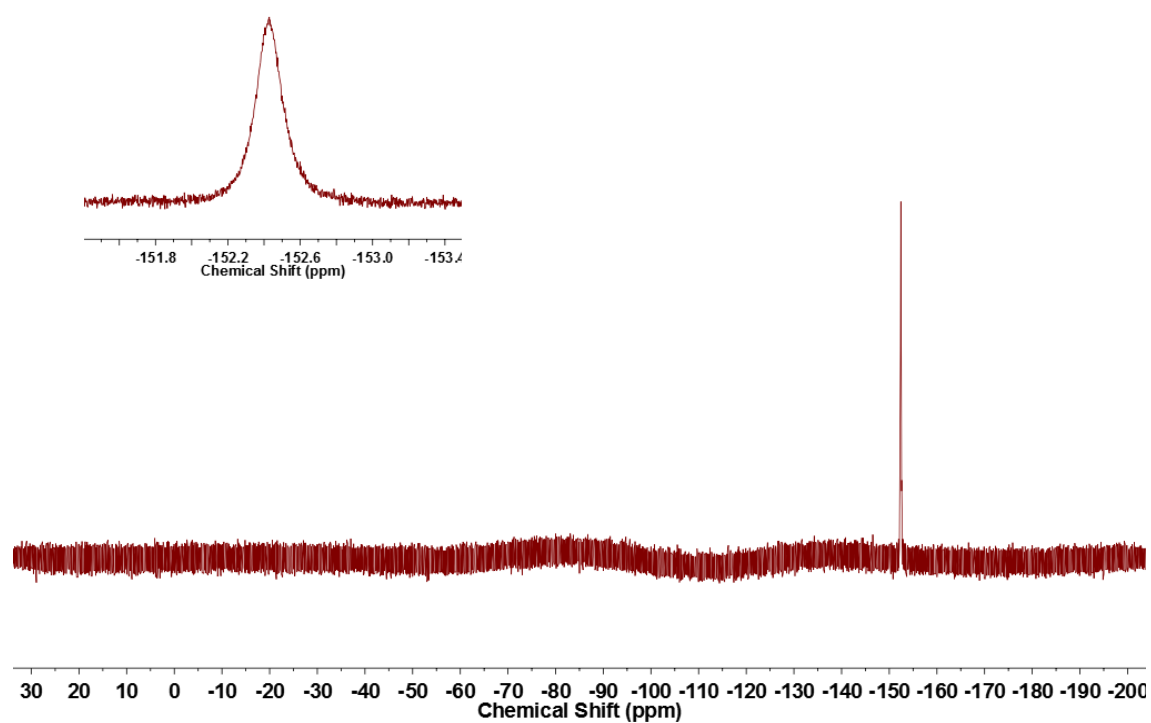

Methyl *N*-Boc-(*S*)-3-fluoro-3-(*N*-Cbz-3-(nitromethyl)azetidin-3-yl)-2-oxindole-6-carboxylate (**3m**)

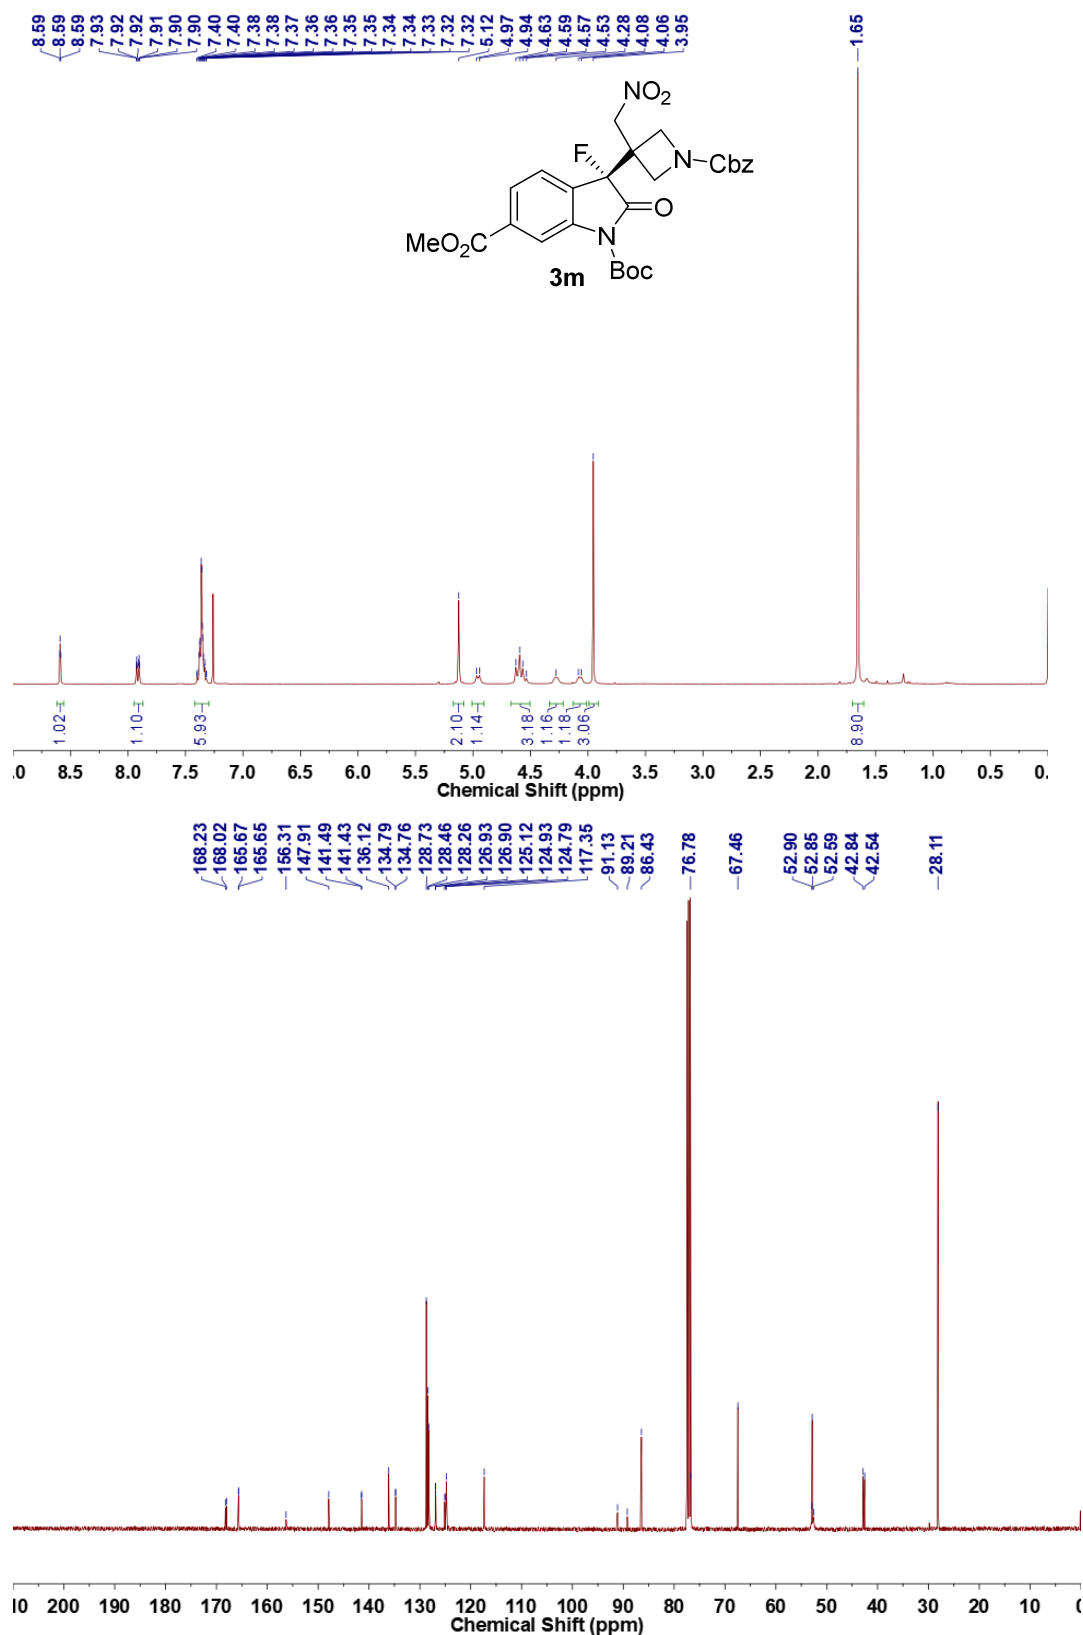

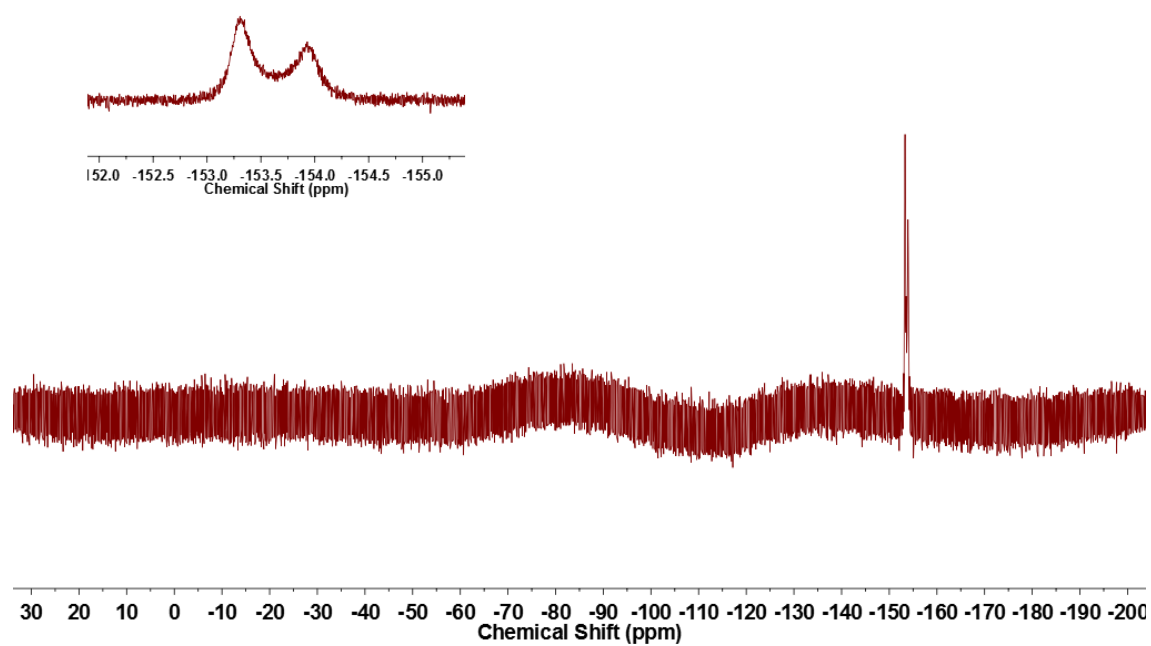



*N*-Boc-(*R*)-3-chloro-3-(3-(nitromethyl)oxetan-3-yl)-2-oxindole (**5a**)

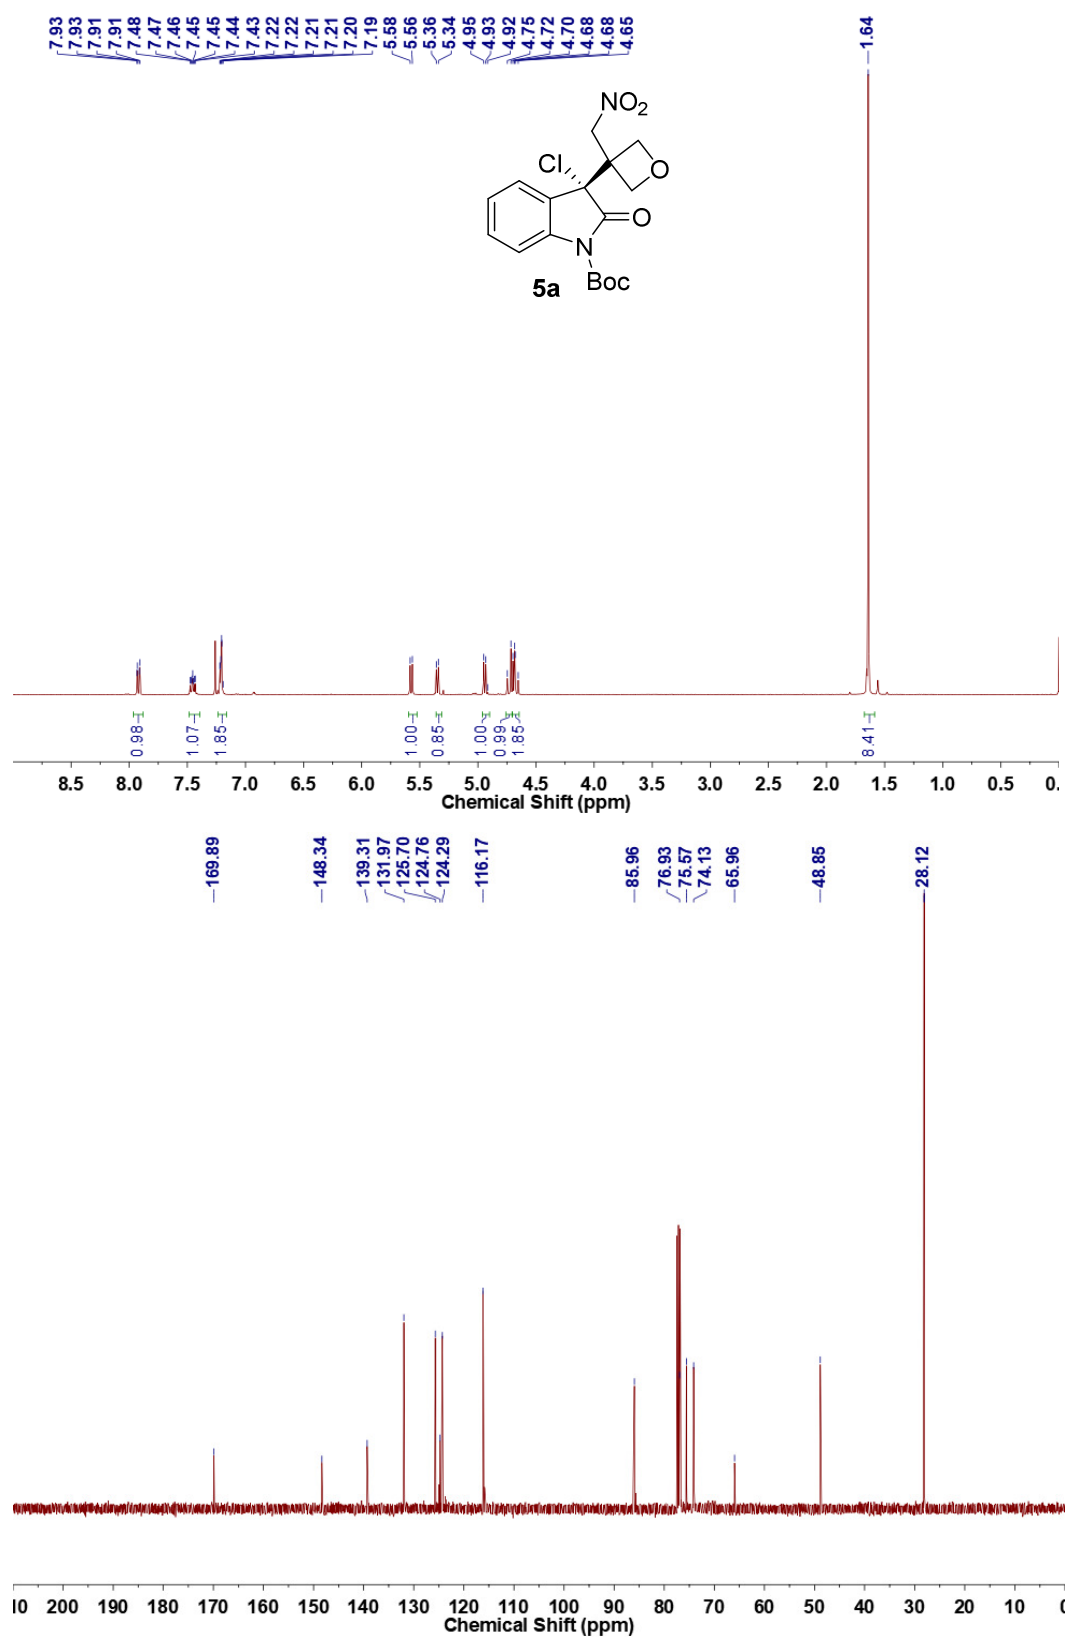

*N*-Boc-(*S*)-3-chloro-3-(*N*-Boc-3-(nitromethyl)azetidin-3-yl)-2-oxoindole (**5b**)

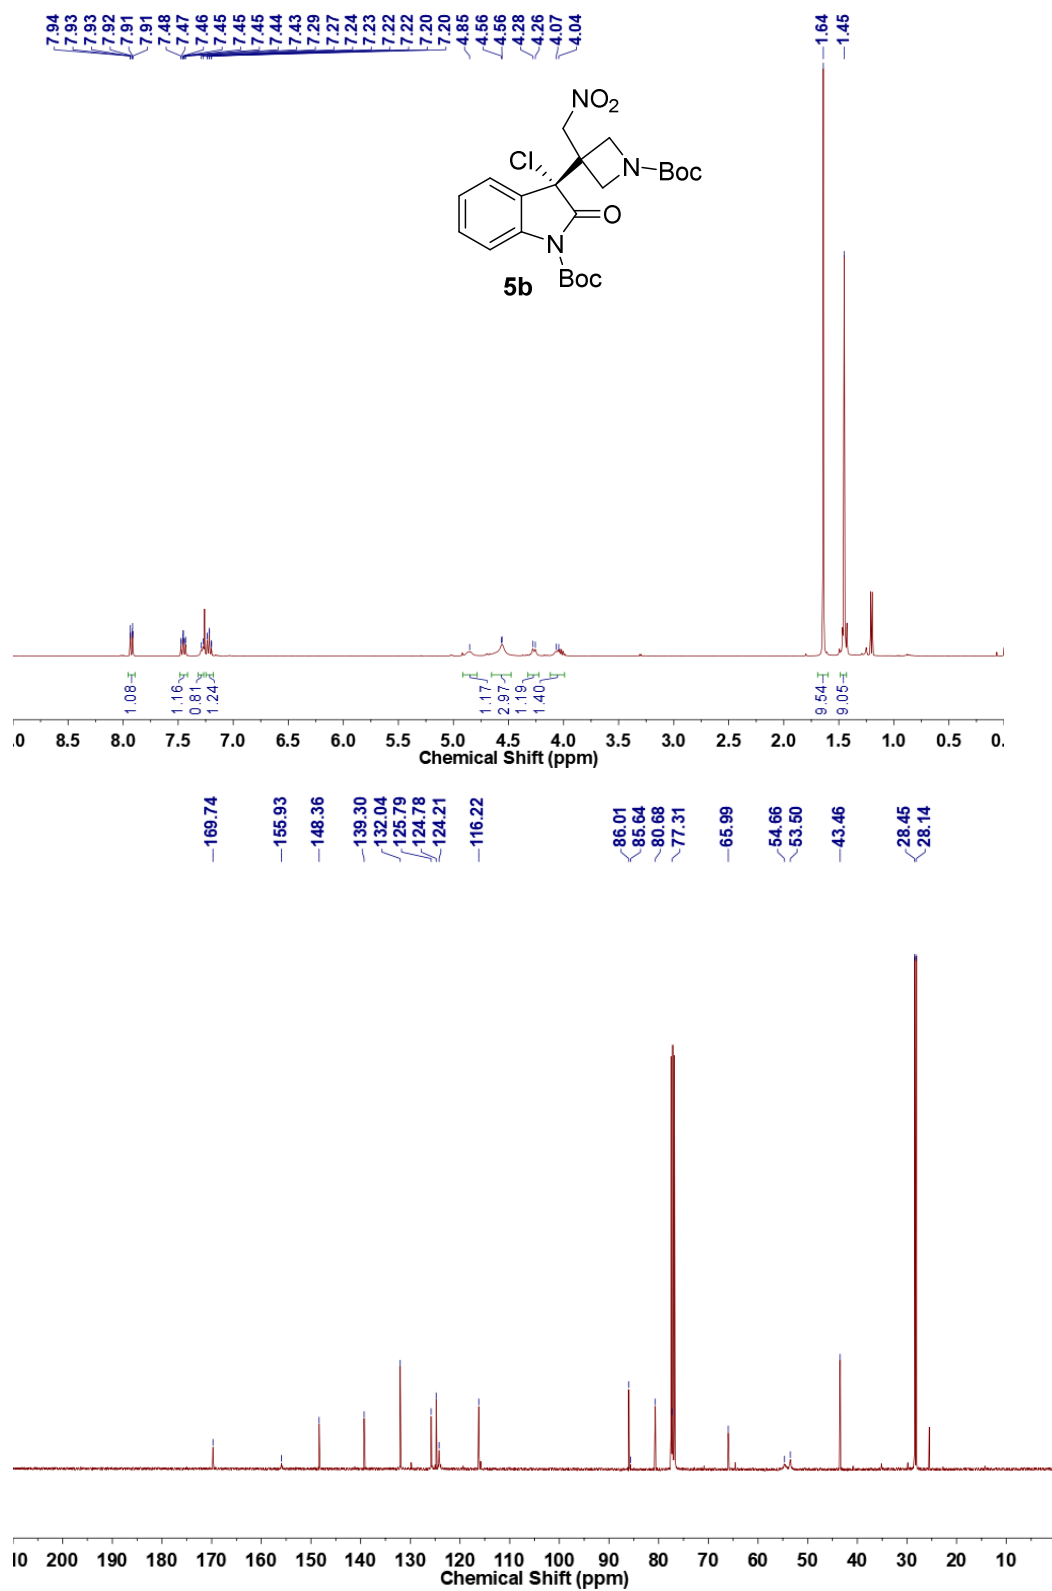

*N*-Boc-(*S*)-3-chloro-3-(*N*-Cbz-3-(nitromethyl)azetidin-3-yl)-2-oxindole (**5c**)

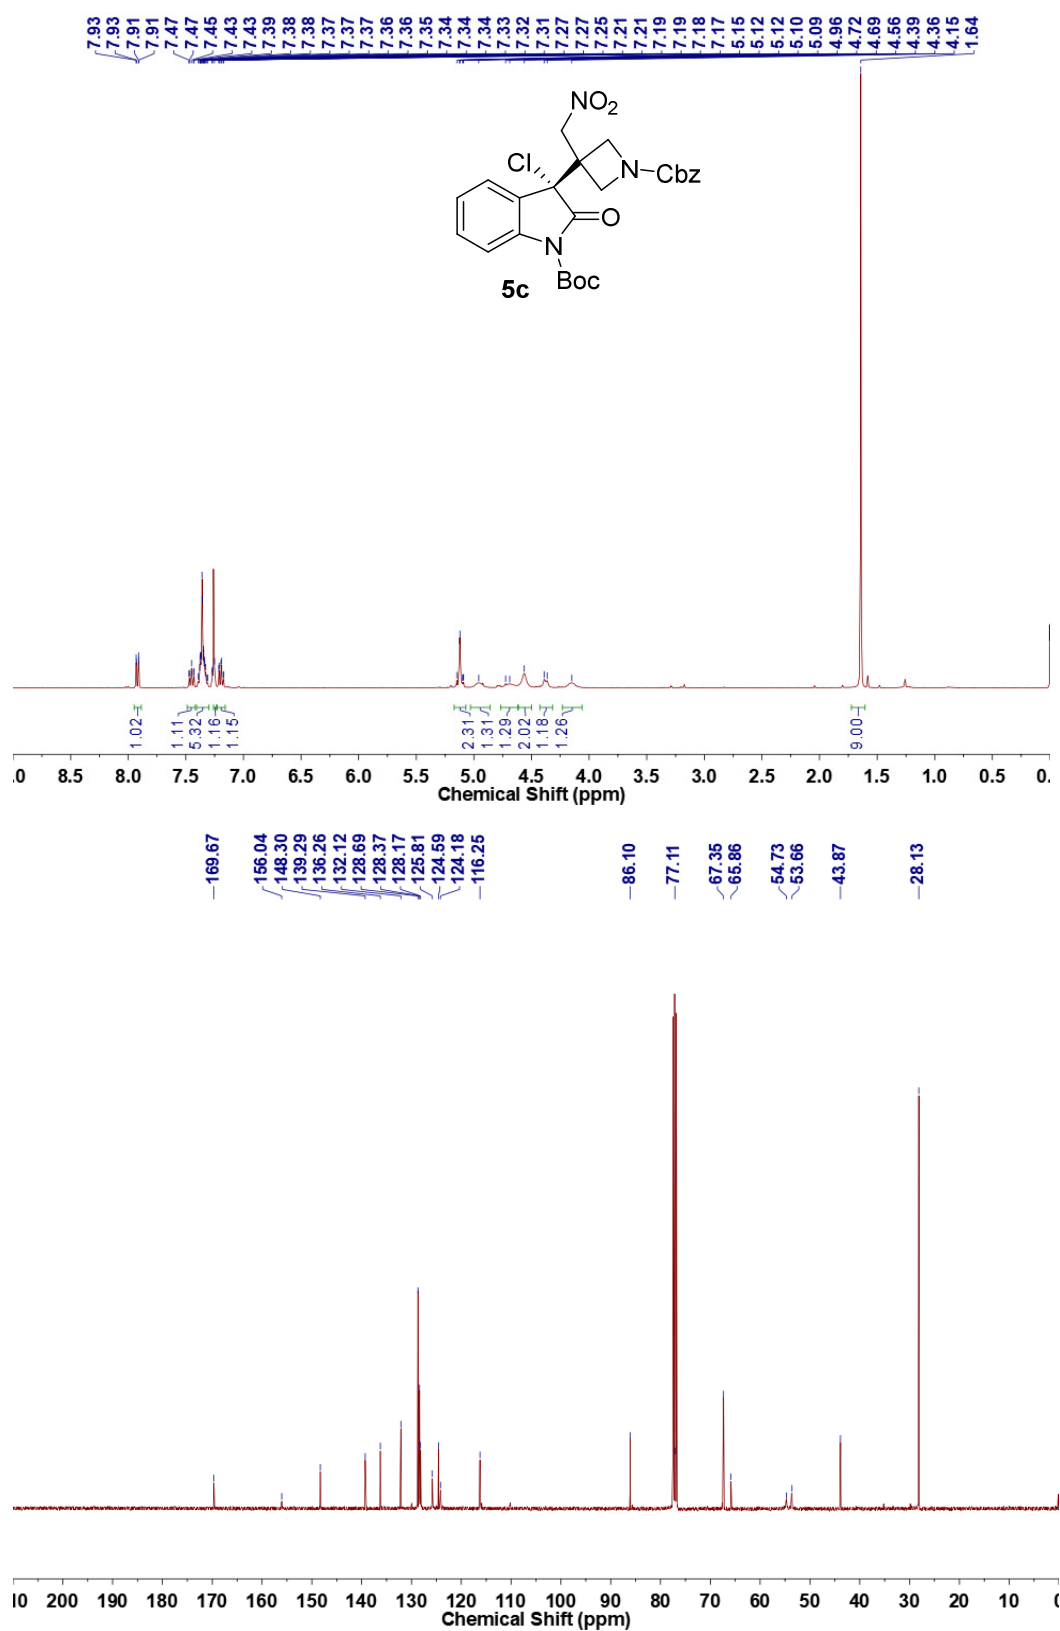

(*R*)-1-Fluoro-1-(3-(nitromethyl)oxetan-3-yl)-3,4-dihydronaphthalen-2(1H)-one (**8a**)

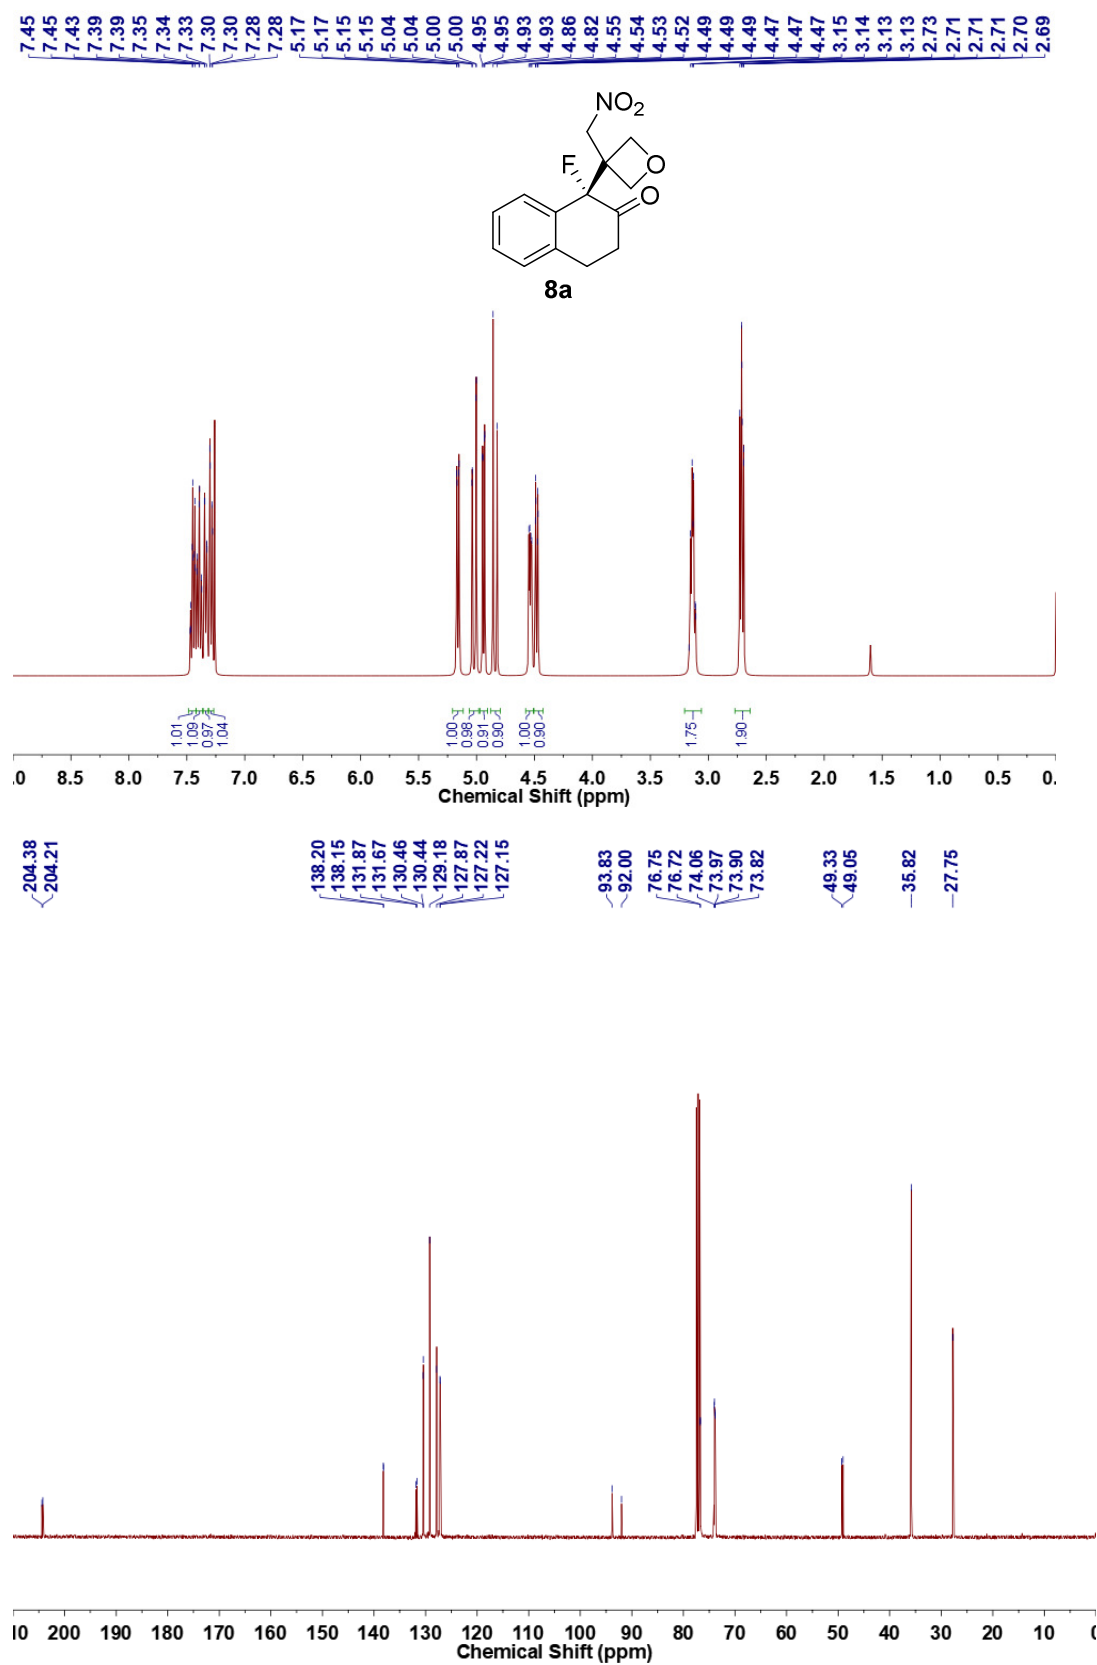

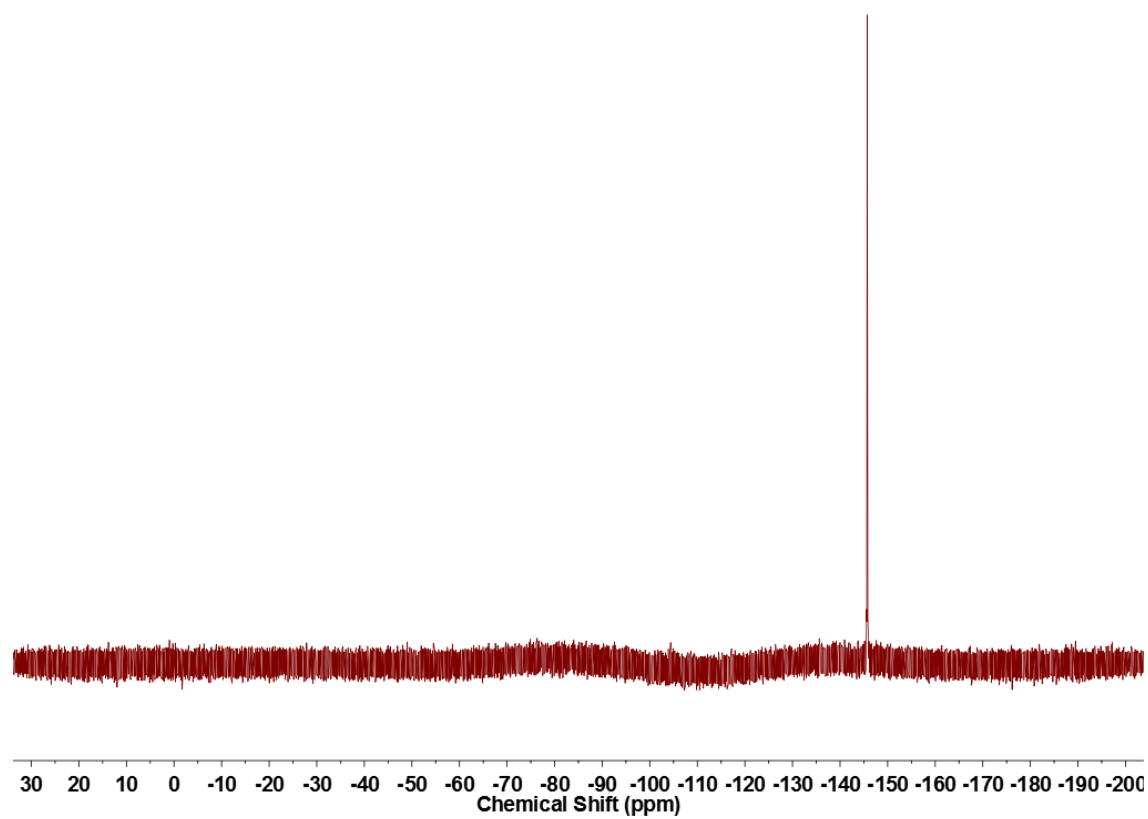

|      |      |      |      |      |      |      |      |      |      |      |      |      |      |      |      |      |      |      |      |      |      |      |      |      |      |      |      |      |      |      |      |      |      |      |      |      |      |      |      |      |      |      |      |      |      |      |      |      |      |      |      |      |      |      |      |      |      |      |      |
|------|------|------|------|------|------|------|------|------|------|------|------|------|------|------|------|------|------|------|------|------|------|------|------|------|------|------|------|------|------|------|------|------|------|------|------|------|------|------|------|------|------|------|------|------|------|------|------|------|------|------|------|------|------|------|------|------|------|------|------|
| 8.01 | 8.00 | 8.00 | 7.99 | 7.98 | 7.98 | 7.98 | 7.66 | 7.65 | 7.64 | 7.64 | 7.63 | 7.62 | 7.62 | 7.51 | 7.49 | 7.49 | 7.47 | 7.47 | 5.22 | 5.18 | 5.16 | 5.14 | 5.14 | 5.13 | 5.10 | 5.10 | 4.80 | 4.79 | 4.78 | 4.78 | 4.78 | 4.77 | 4.77 | 4.77 | 4.75 | 4.74 | 4.74 | 4.73 | 4.72 | 4.72 | 4.30 | 4.29 | 4.29 | 4.28 | 4.28 | 4.26 | 4.24 | 4.24 | 4.21 | 4.20 | 4.18 | 4.17 | 4.16 | 4.15 | 4.15 | 1.18 | 1.16 | 1.16 | 1.14 |
|------|------|------|------|------|------|------|------|------|------|------|------|------|------|------|------|------|------|------|------|------|------|------|------|------|------|------|------|------|------|------|------|------|------|------|------|------|------|------|------|------|------|------|------|------|------|------|------|------|------|------|------|------|------|------|------|------|------|------|------|

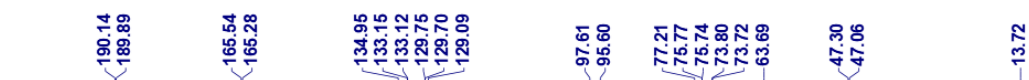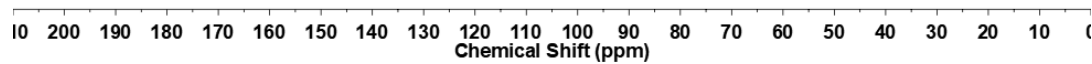

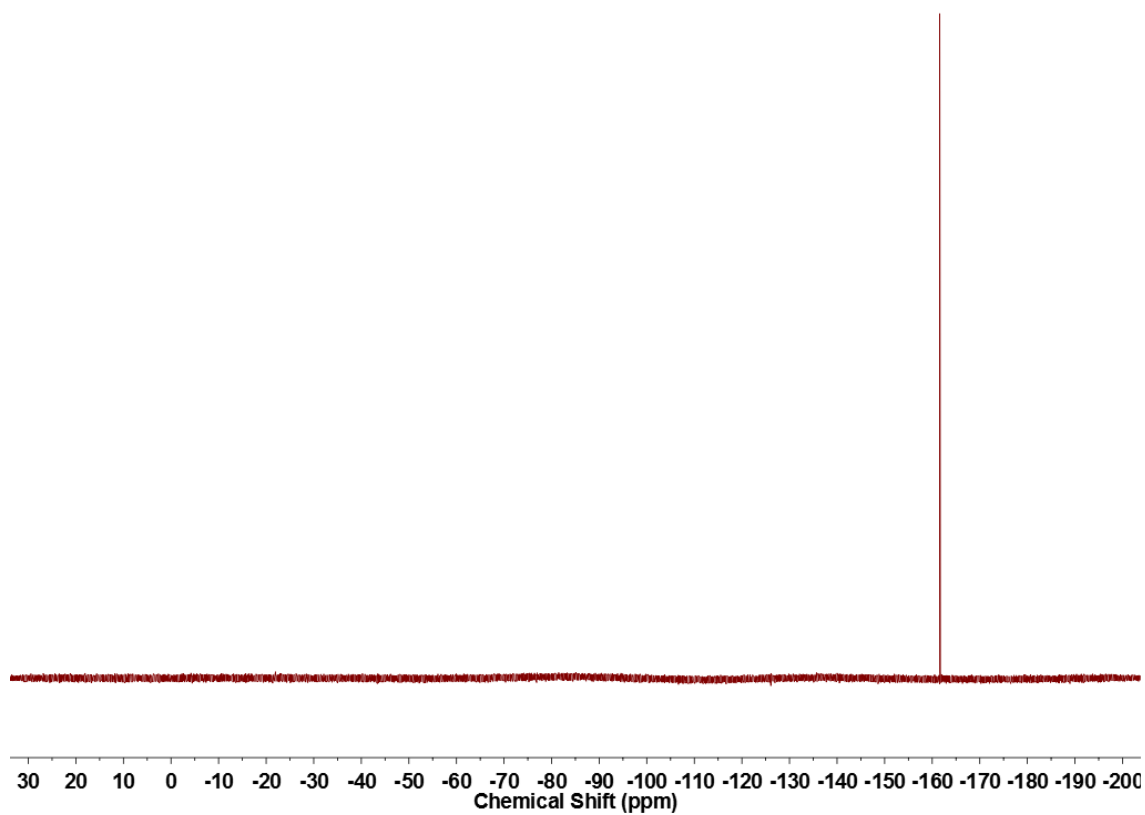

Ethyl (*R*)-2-fluoro-2-(*N*-Cbz-3-(nitromethyl)azetidin-3-yl)-3-oxo-3-phenylpropanoate (**8c**)

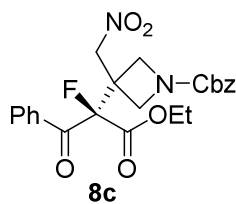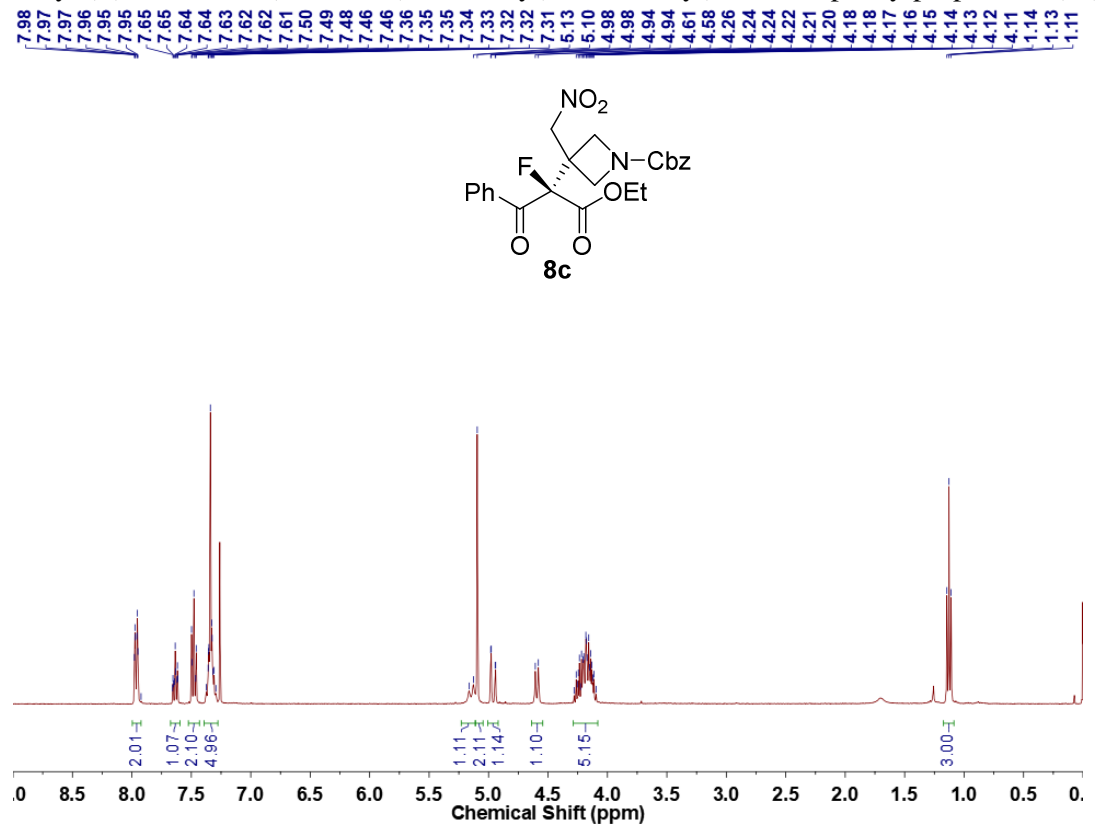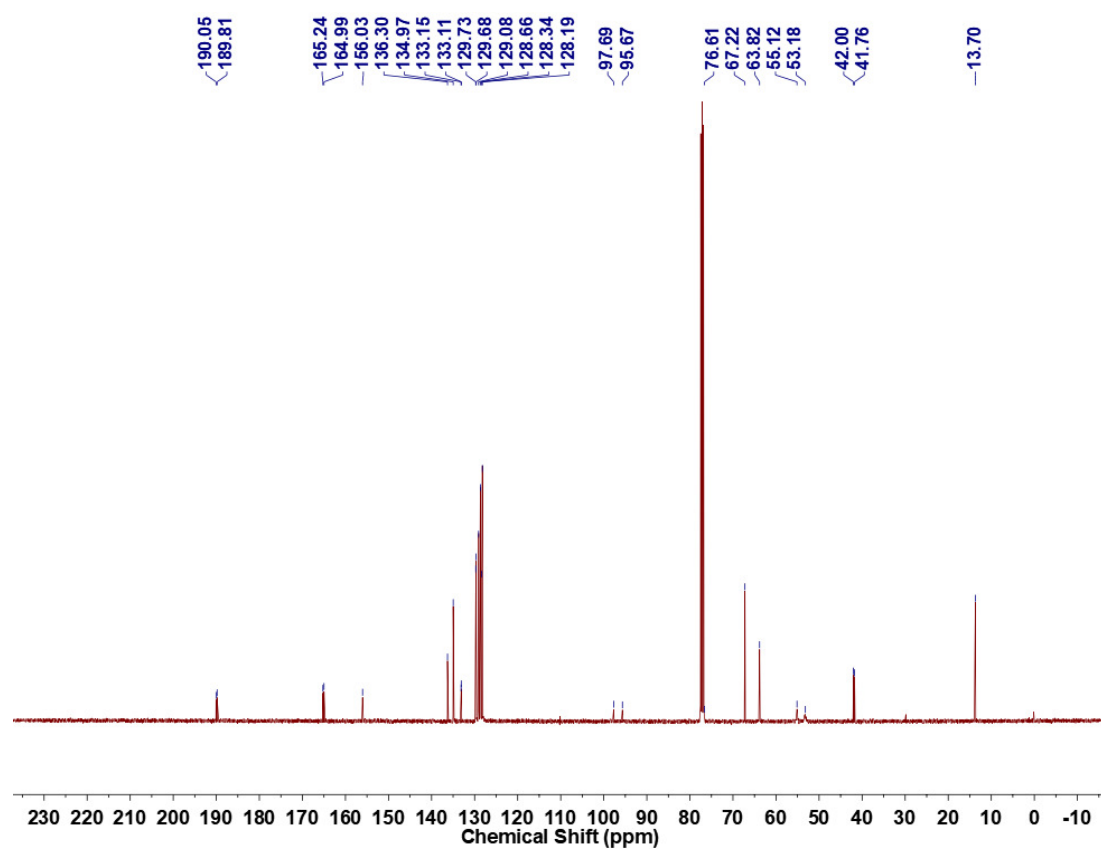



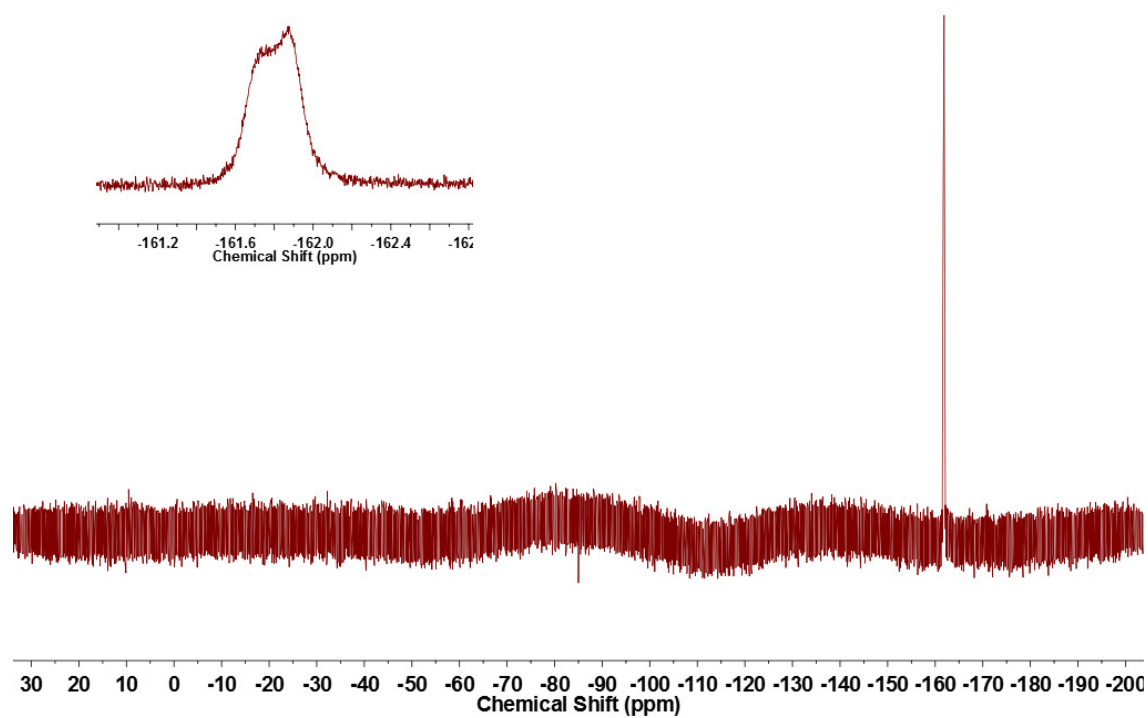

Ethyl (*R*)-2-fluoro-2-(*N*-Boc-3-(nitromethyl)azetidin-3-yl)-3-oxo-3-phenylpropanoate (**8d**)

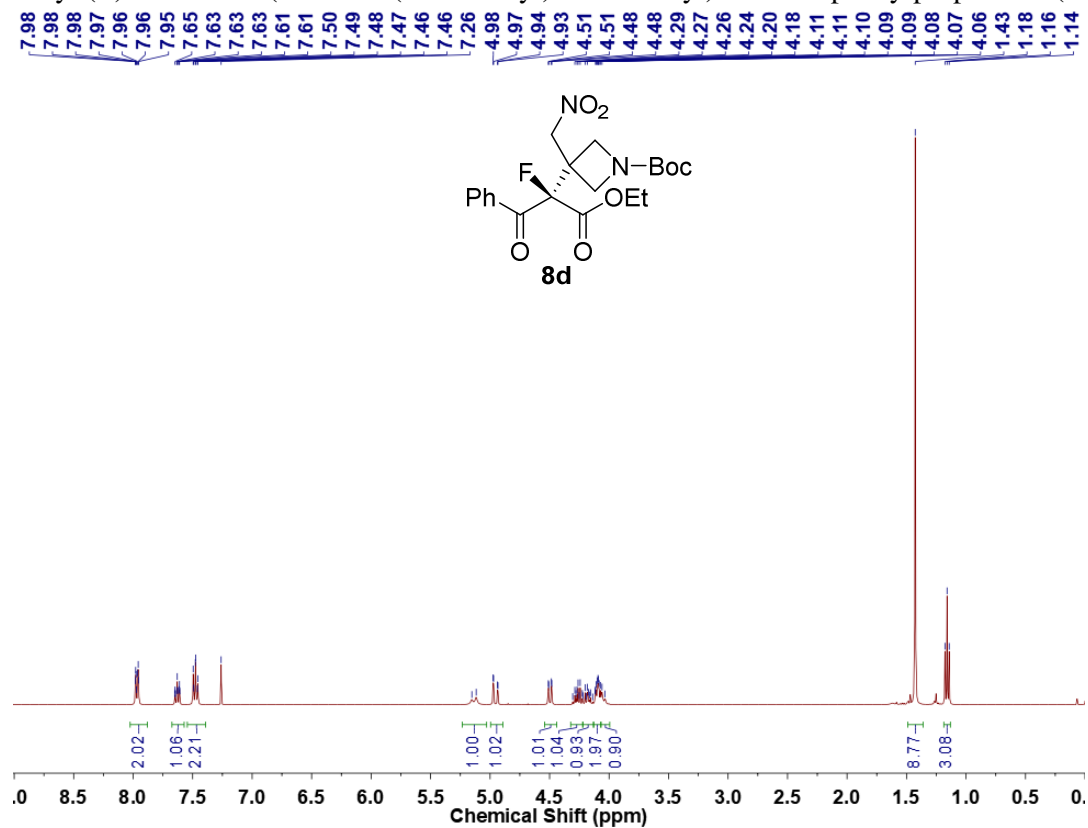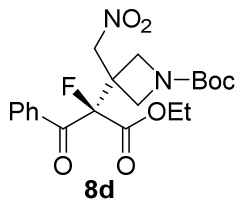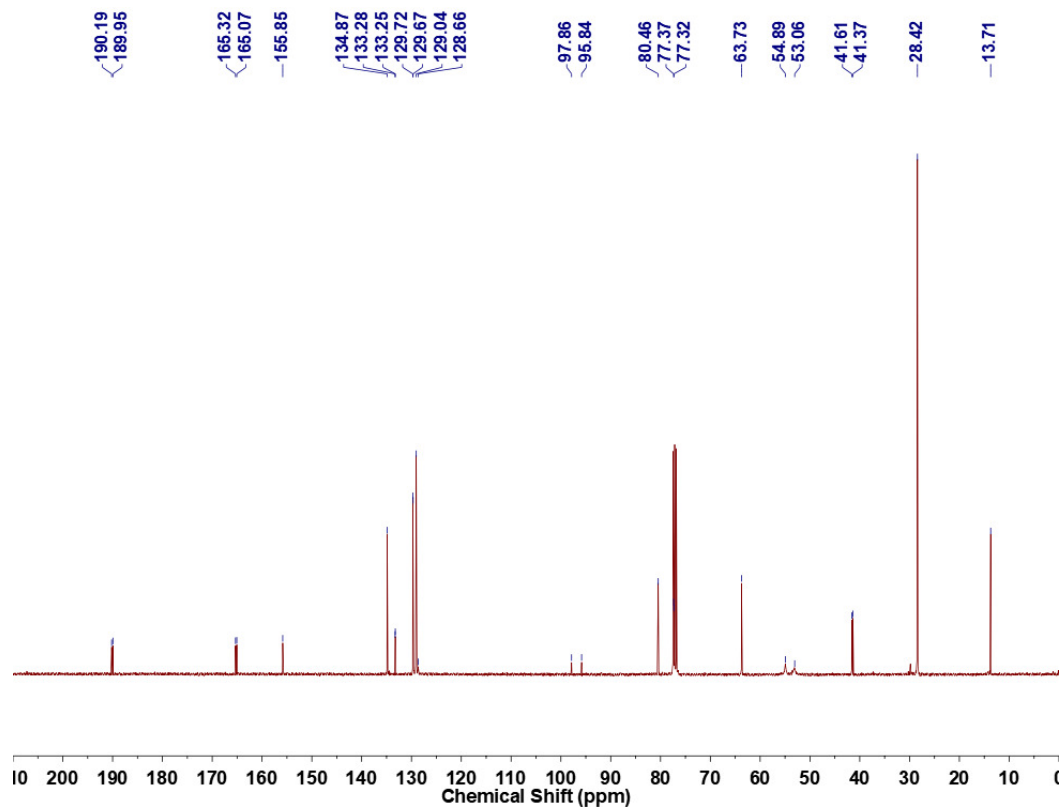

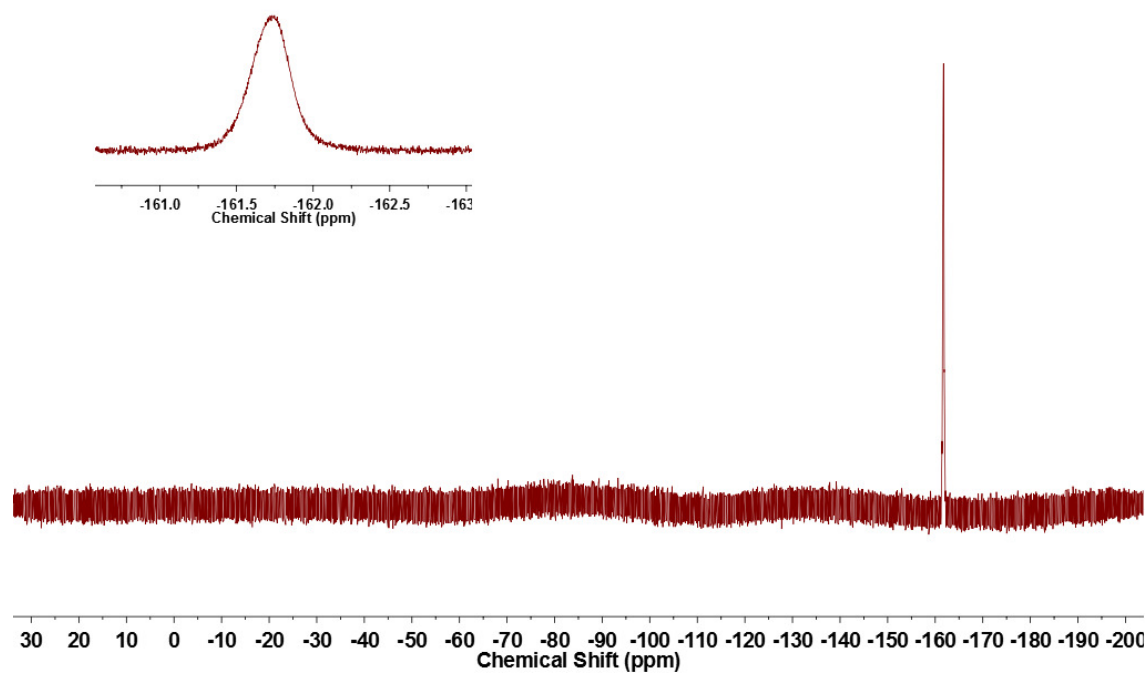

Methyl (R)-2-(2-((*tert*-butoxycarbonyl)amino)phenyl)-2-fluoro-2-(3 (nitromethyl)oxetan-3-yl)acetate (**9**)

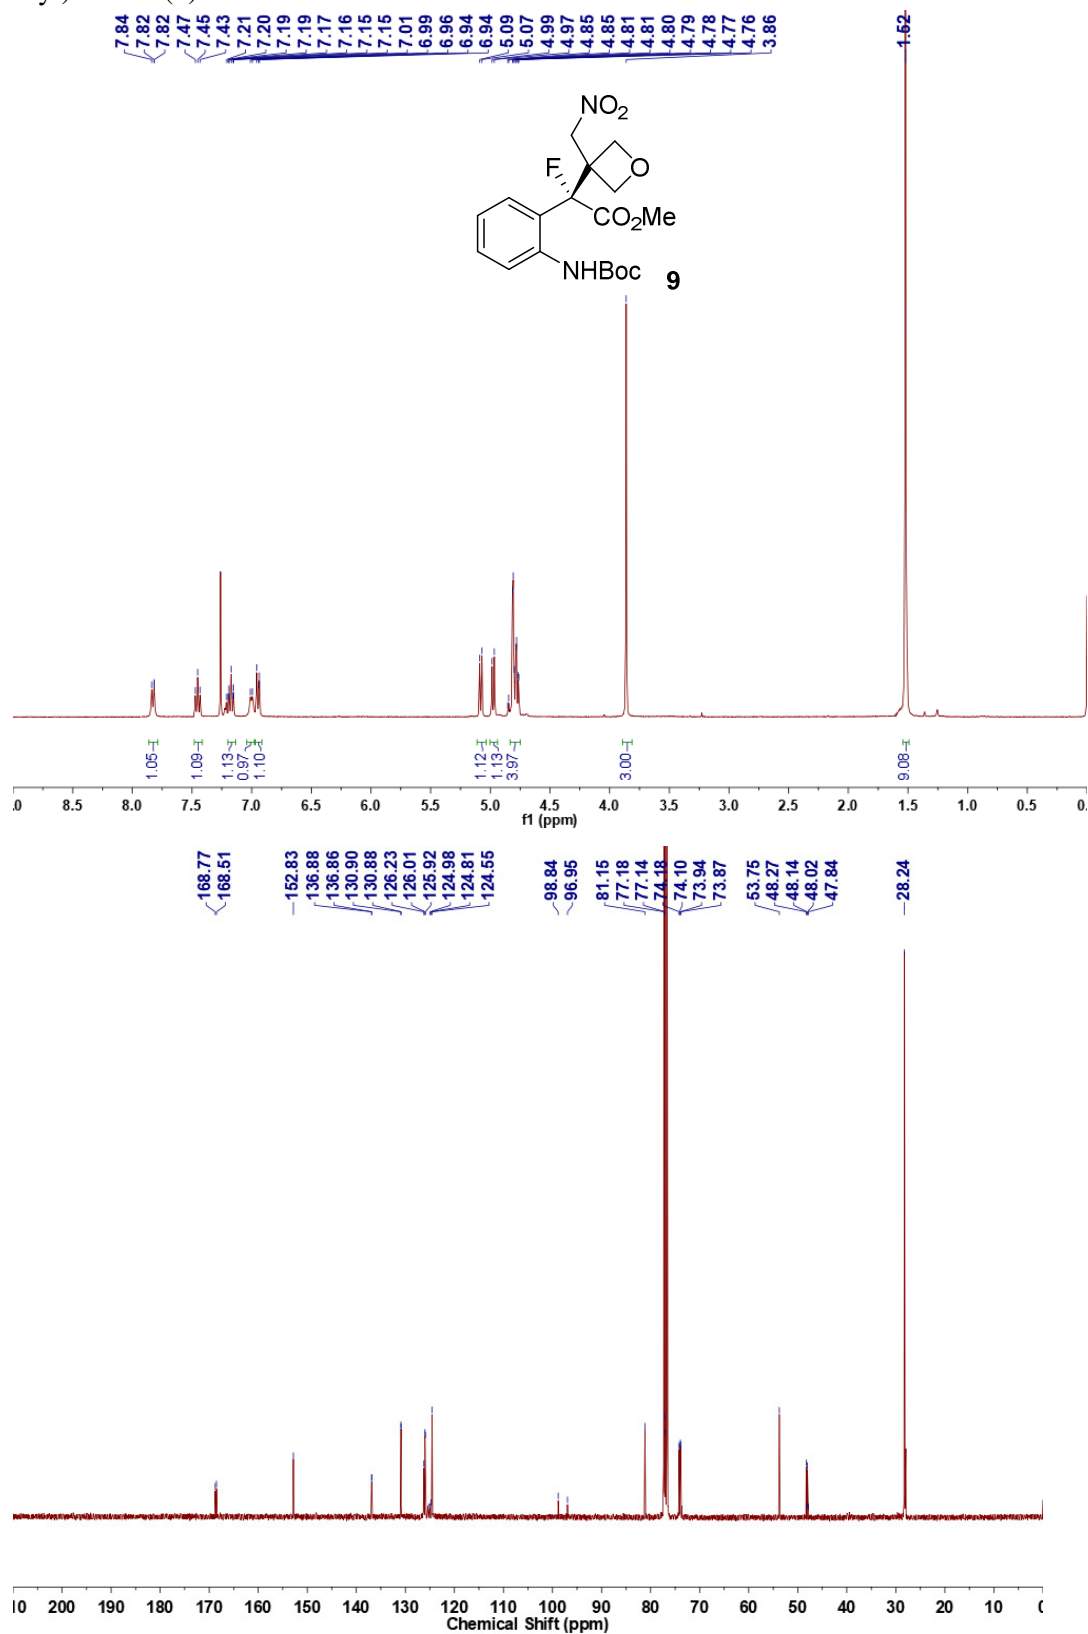

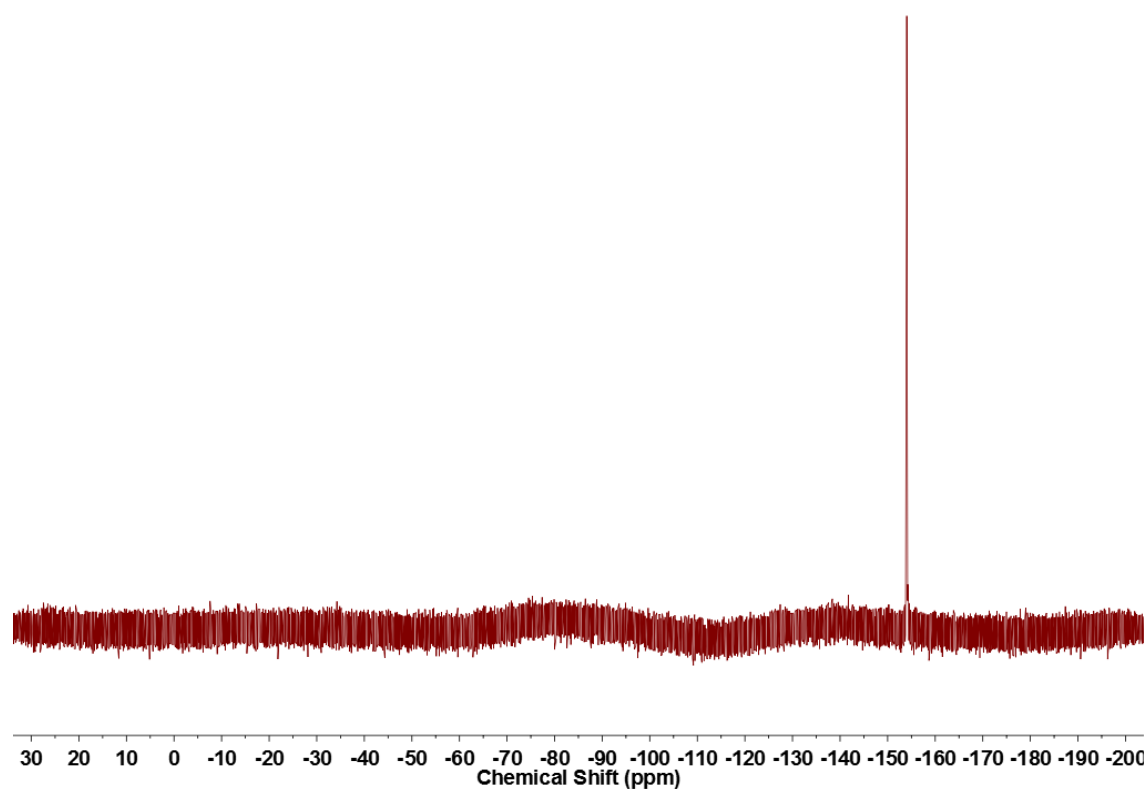

Di-*tert*-butyl (2'*S*,3'*S*)-3'-nitro-2''-oxodispiro[azetidine-3,1'-cyclopropane-2',3''-indoline]-1,1''-dicarboxylate (**10**)

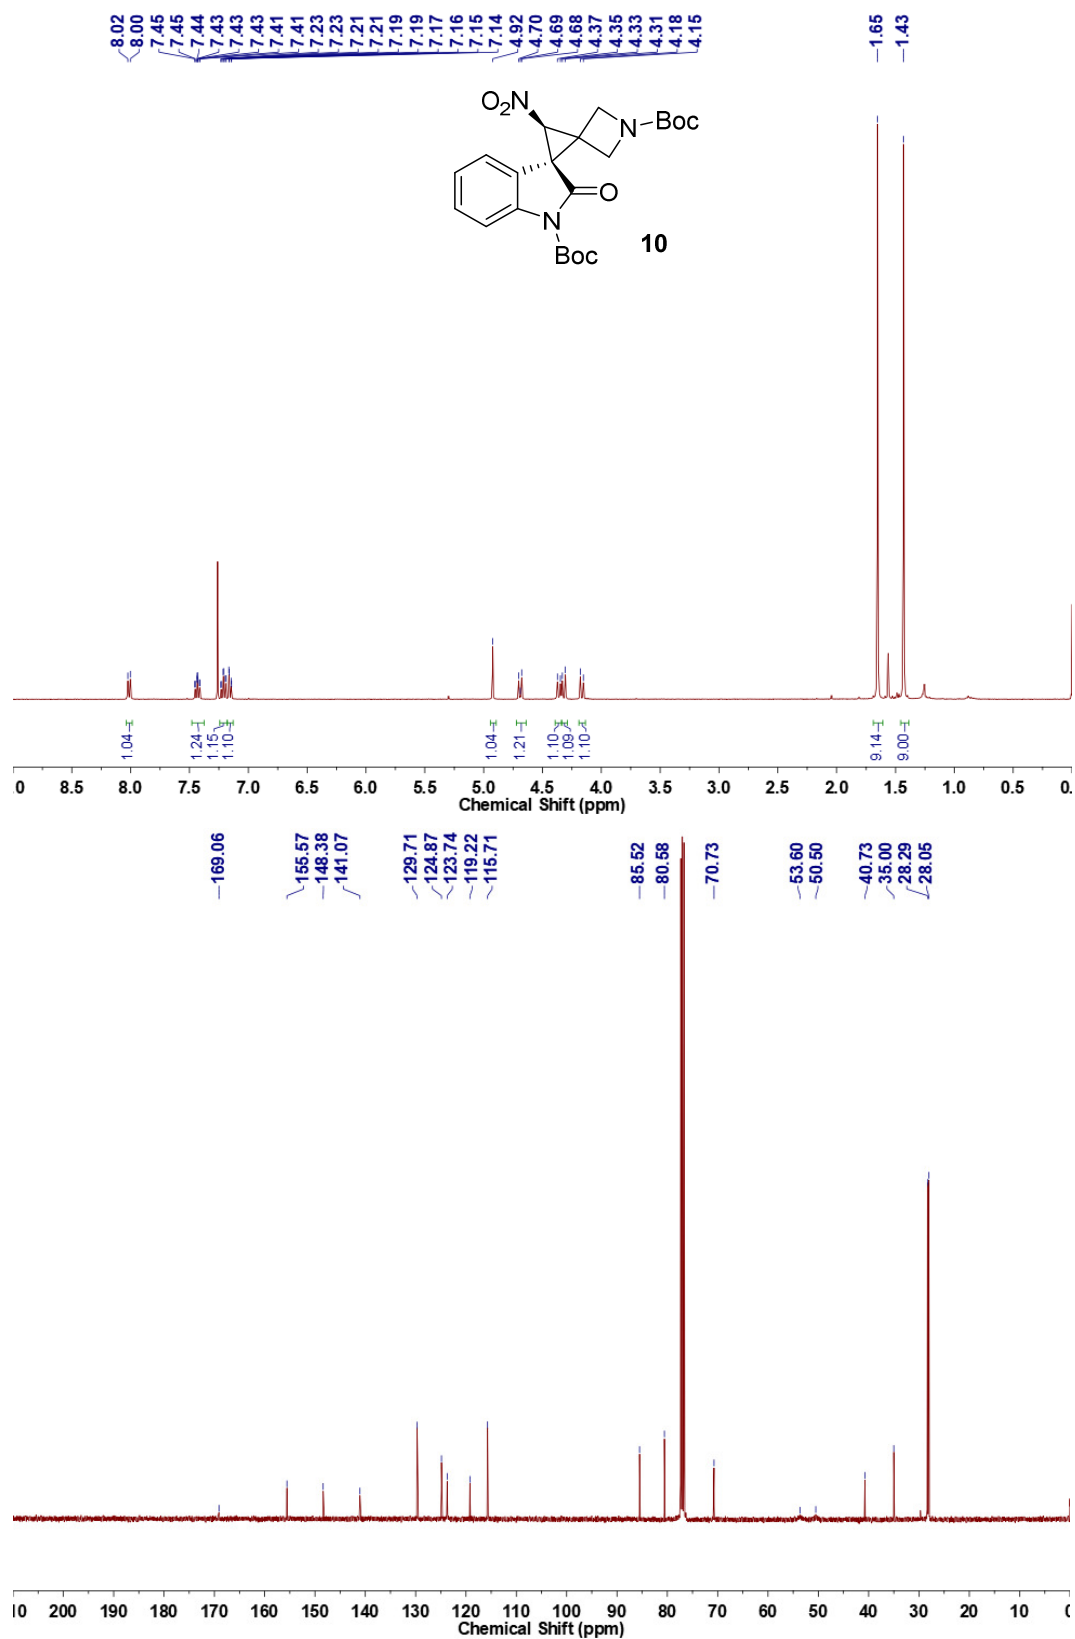

1-Benzyl 1''-(*tert*-butyl) (2'*S*,3'*S*)-3'-nitro-2''-oxodispiro[azetidine-3,1'-cyclopropane-2',3''-indoline]-1,1''-dicarboxylate (**11**)

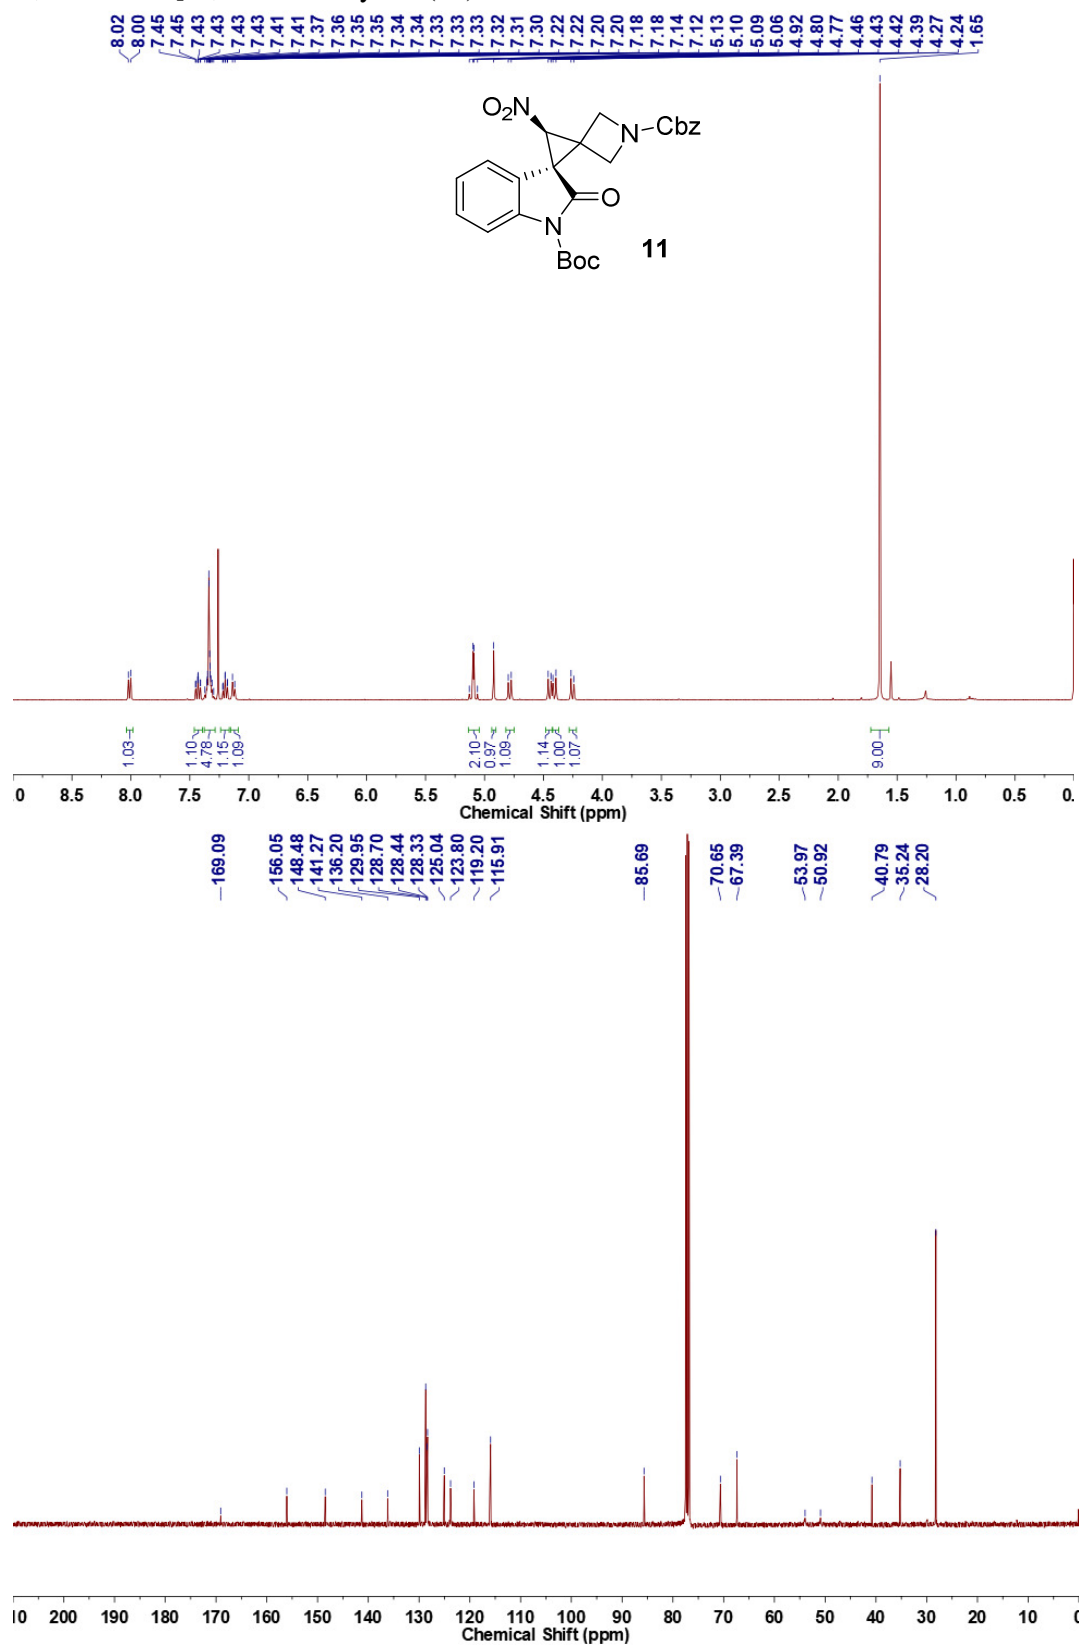

Ethyl (7*S*,8*R*)-6-ethyl-8-fluoro-7-phenyl-2-oxa-6-azaspiro[3.4]octane-8-carboxylate (**12**)

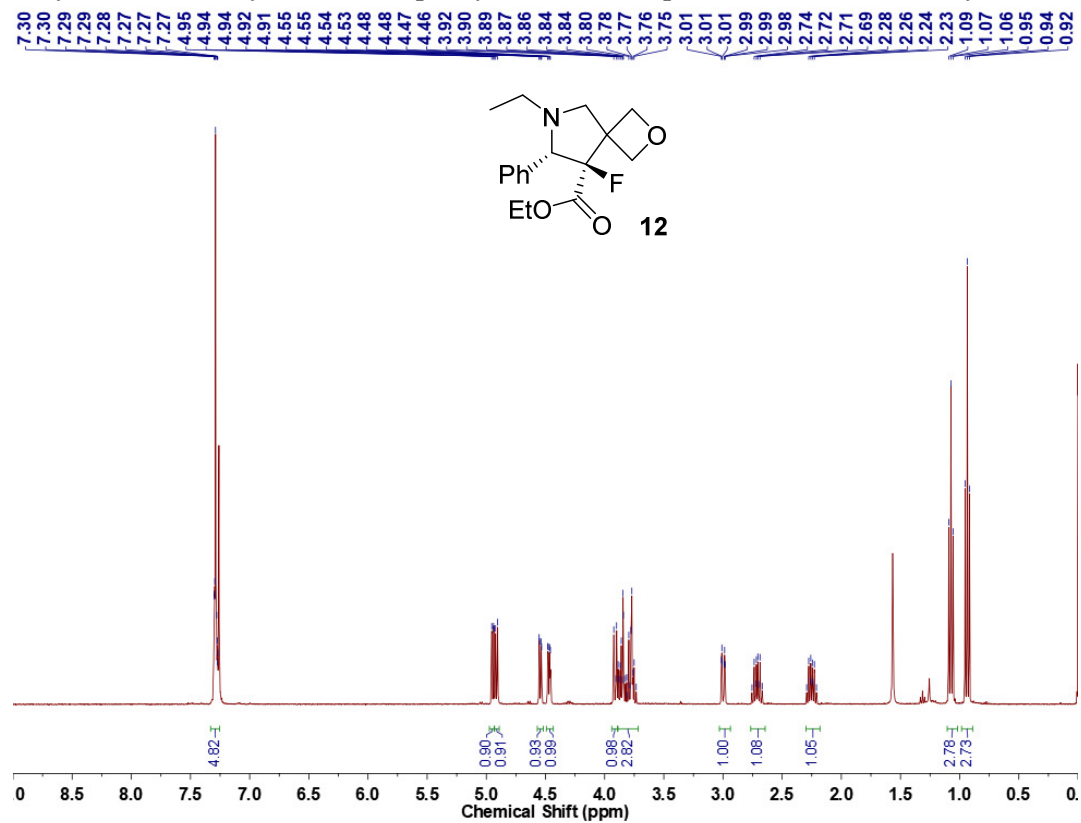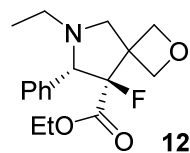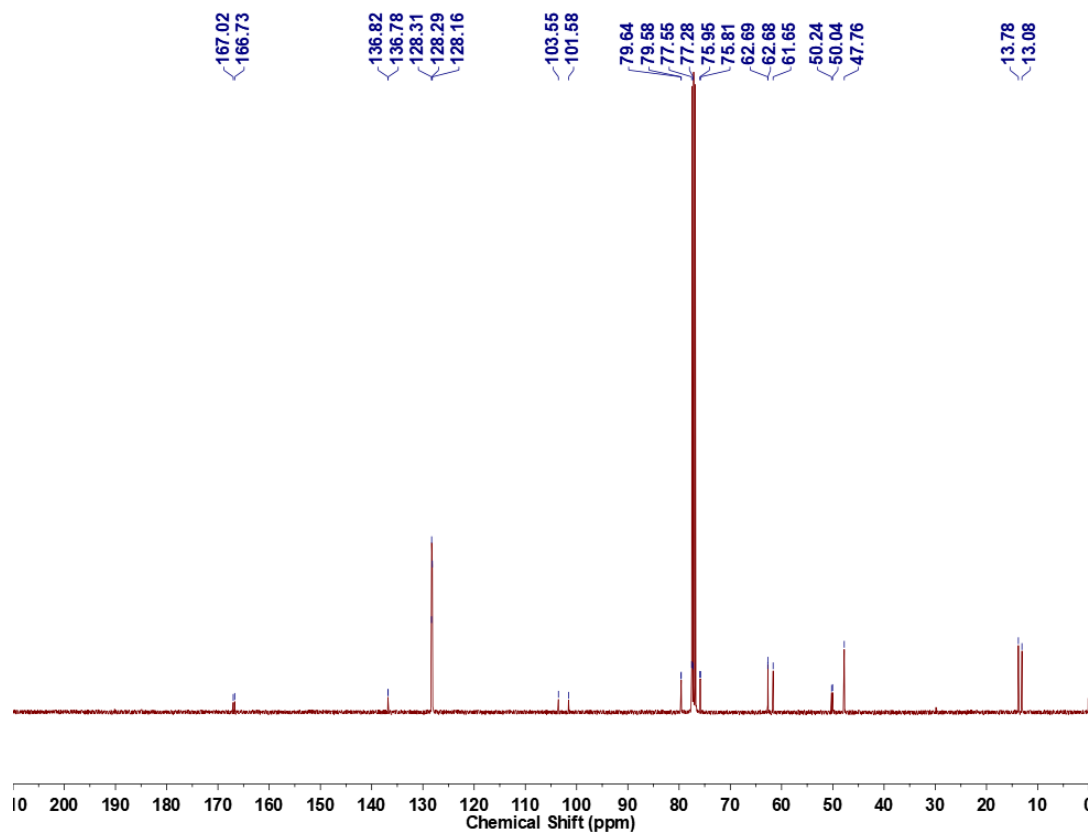



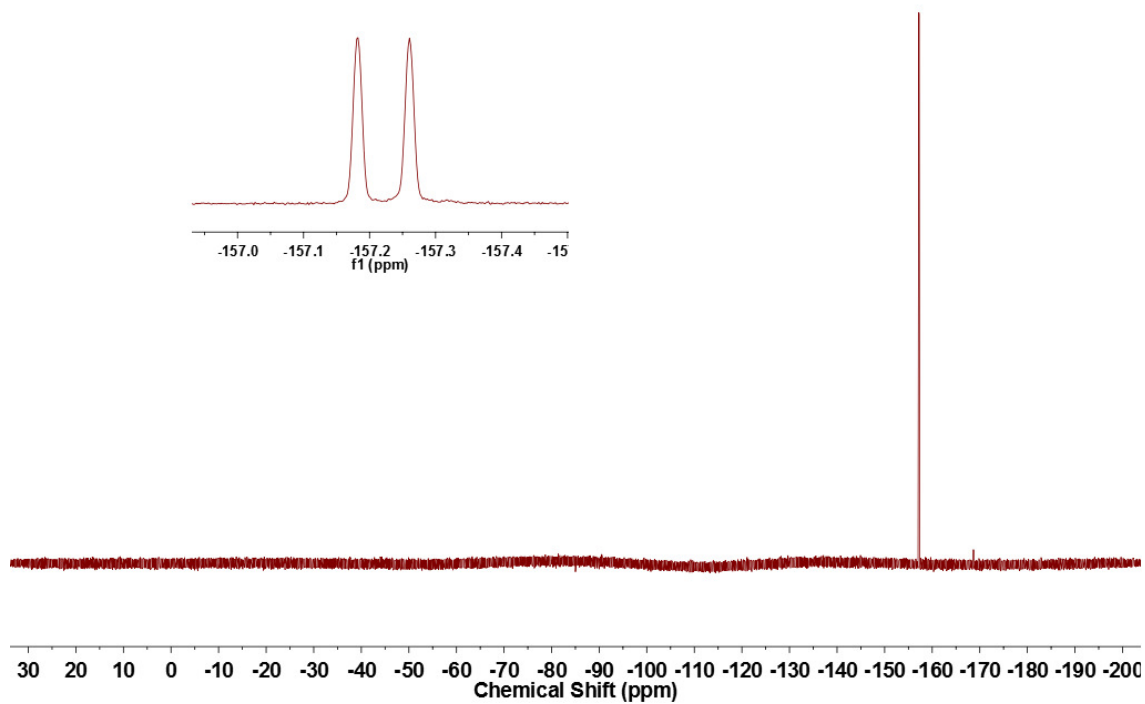

Chemical structure of compound 12 is shown, which is a bicyclic system with a phenyl group (Ph), an ethyl group (EtO), a fluorine atom (F), and an oxygen atom (O).

*tert*-Butyl (R)-3-((S)-1-(benzylthio)-3-hydroxy-2-(nitromethyl)propan-2-yl)-3-fluoro-2-oxoindole-1-carboxylate (**13**)

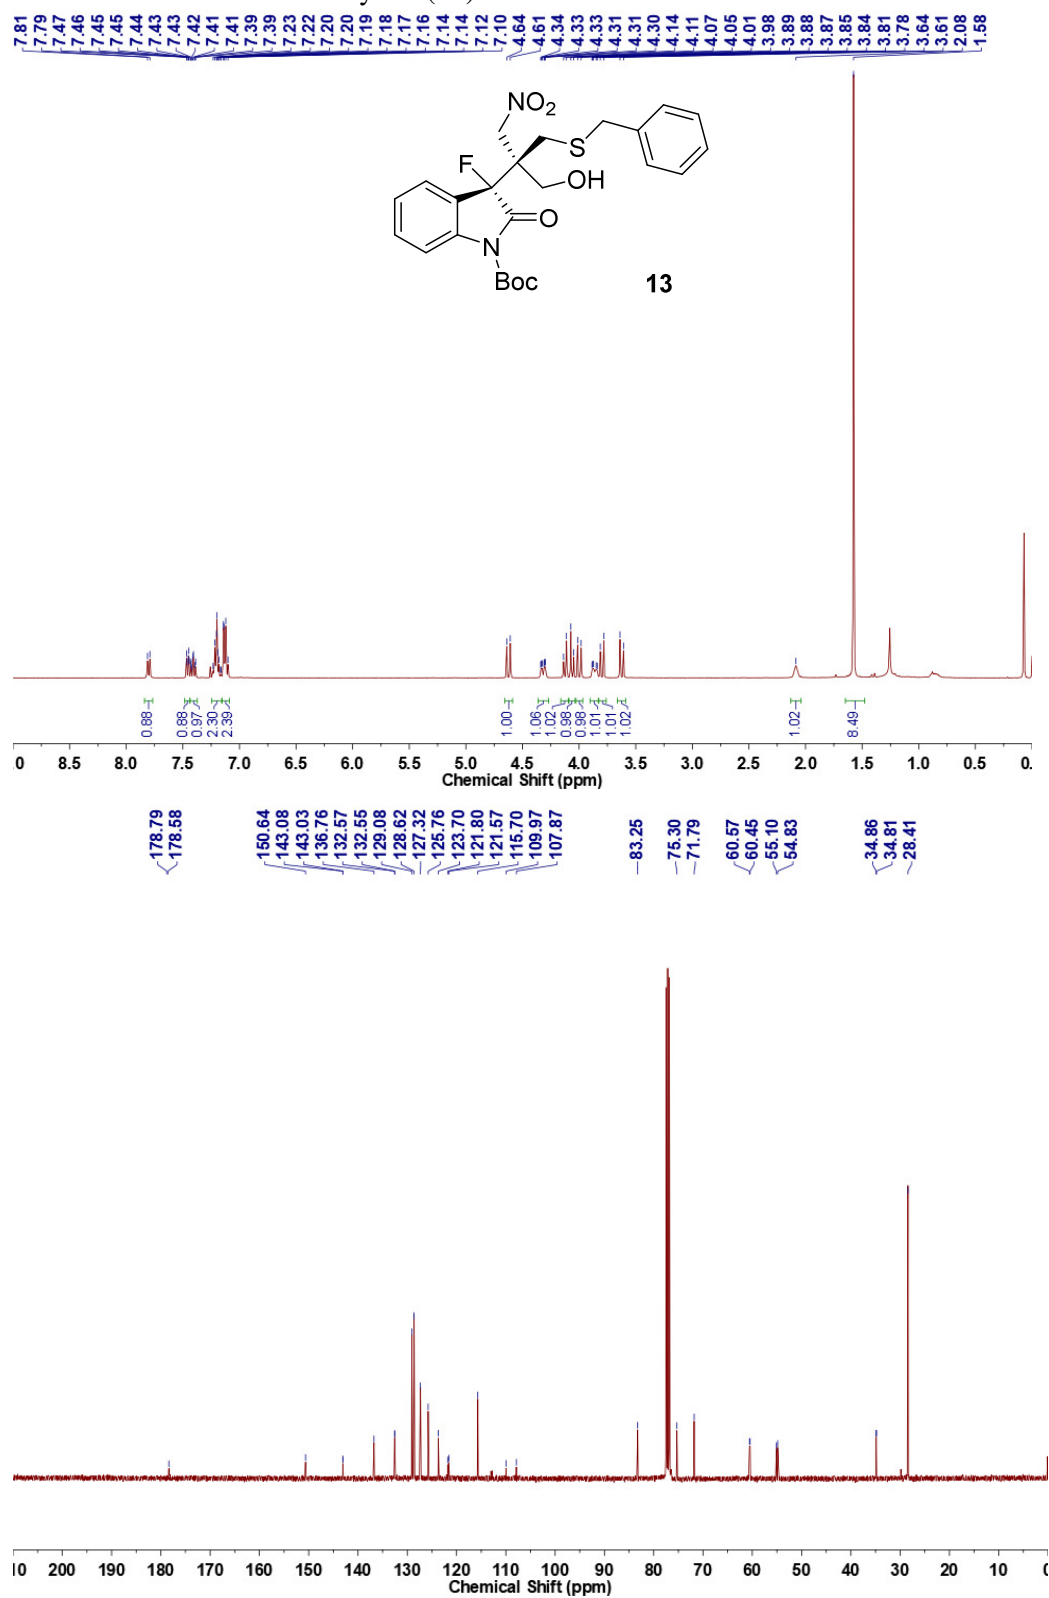

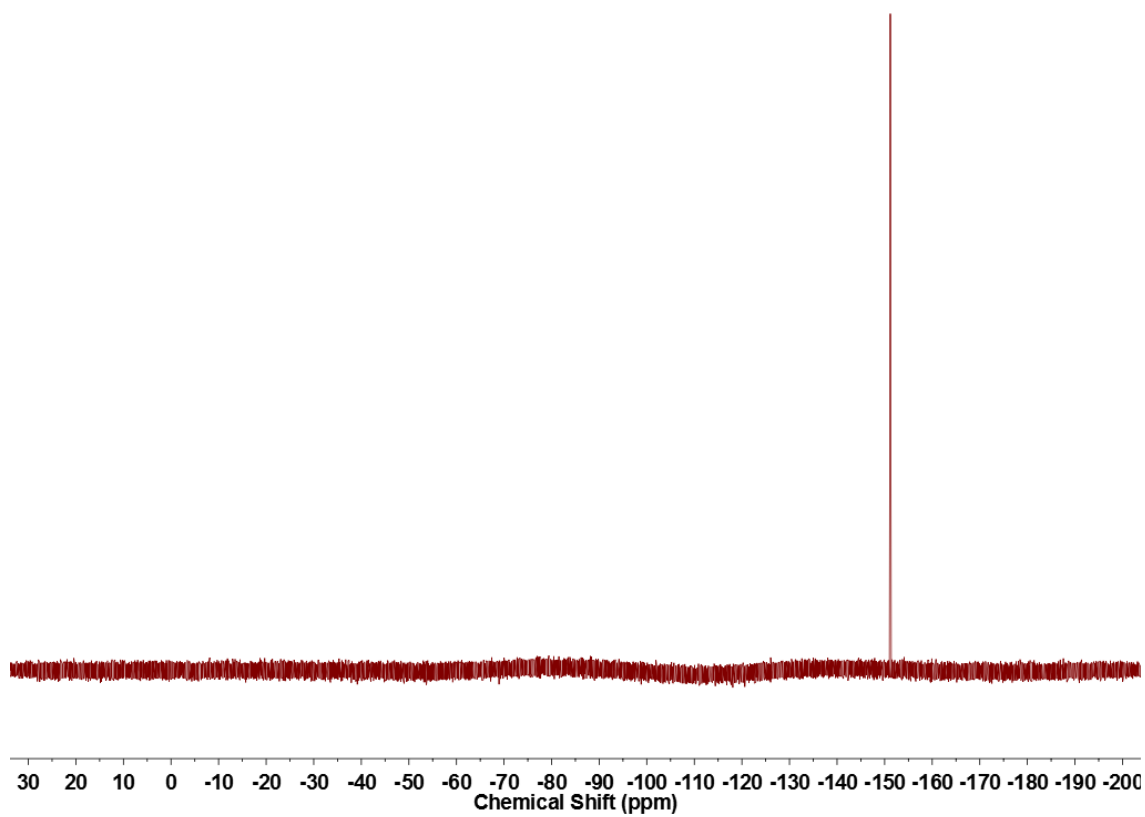

## 5. Crystallographic Data

(*R*)-1-Fluoro-1-(3-(nitromethyl)oxetan-3-yl)-3,4-dihydronaphthalen-2(1H)-one (**8a**)

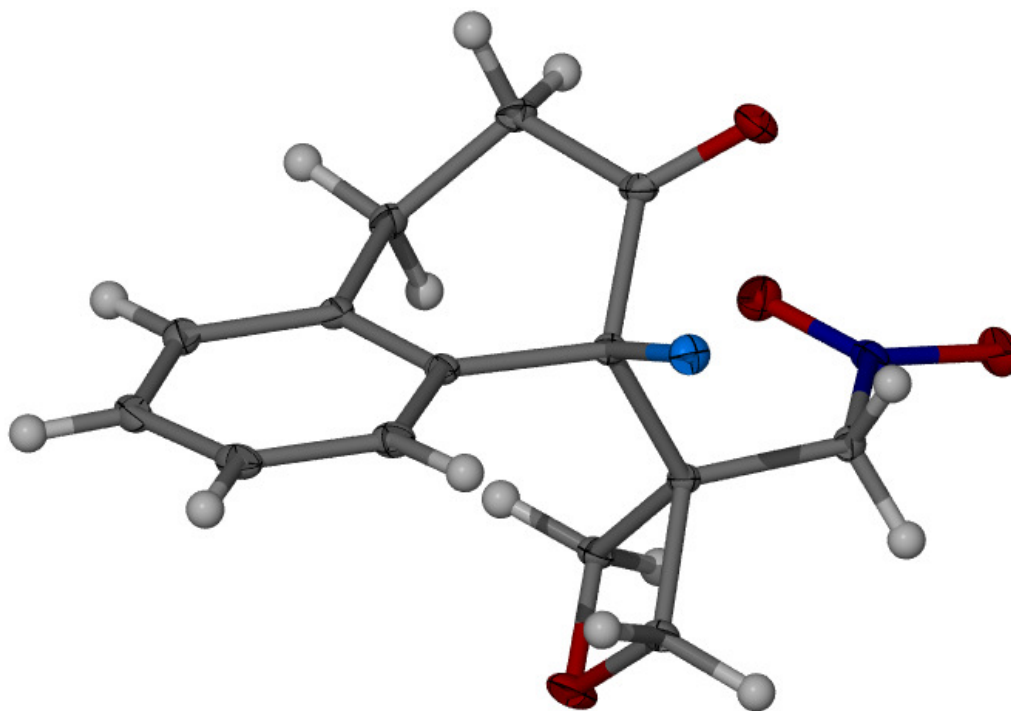

A single crystal was obtained by slow evaporation of a solution of **8a** in CH<sub>2</sub>Cl<sub>2</sub>. Single crystal X-ray analysis was performed at 100 K using a Siemens platform diffractometer with graphite monochromated Mo-K $\alpha$  radiation ( $\lambda = 0.71073$  Å). Data were integrated and corrected using the Apex 3 program. The structures were solved by direct methods and refined with full-matrix least-square analysis using SHELX-97-2 software. Non-hydrogen atoms were refined with anisotropic displacement parameter. Crystal data: C<sub>14</sub>H<sub>14</sub>FNO<sub>4</sub>,  $M = 279.26$ , colorless block, 0.43 x 0.77 x 0.92 mm<sup>3</sup>, monoclinic, space group  $P2_1$ ,  $a = 8.4753(5)$ ,  $b = 7.4483(4)$ ,  $c = 9.7720(6)$  Å,  $V = 601.09(6)$  Å<sup>3</sup>,  $Z = 2$ . Absolute structure parameter = 0.087(680) (Flack, H. D. *Acta Cryst.* **1983**, A39, 876-881).

*N*-Boc-(*R*)-7-chloro-3-fluoro-3-(3-(nitromethyl)oxetan-3-yl)-2-oxoindole (**3d**)

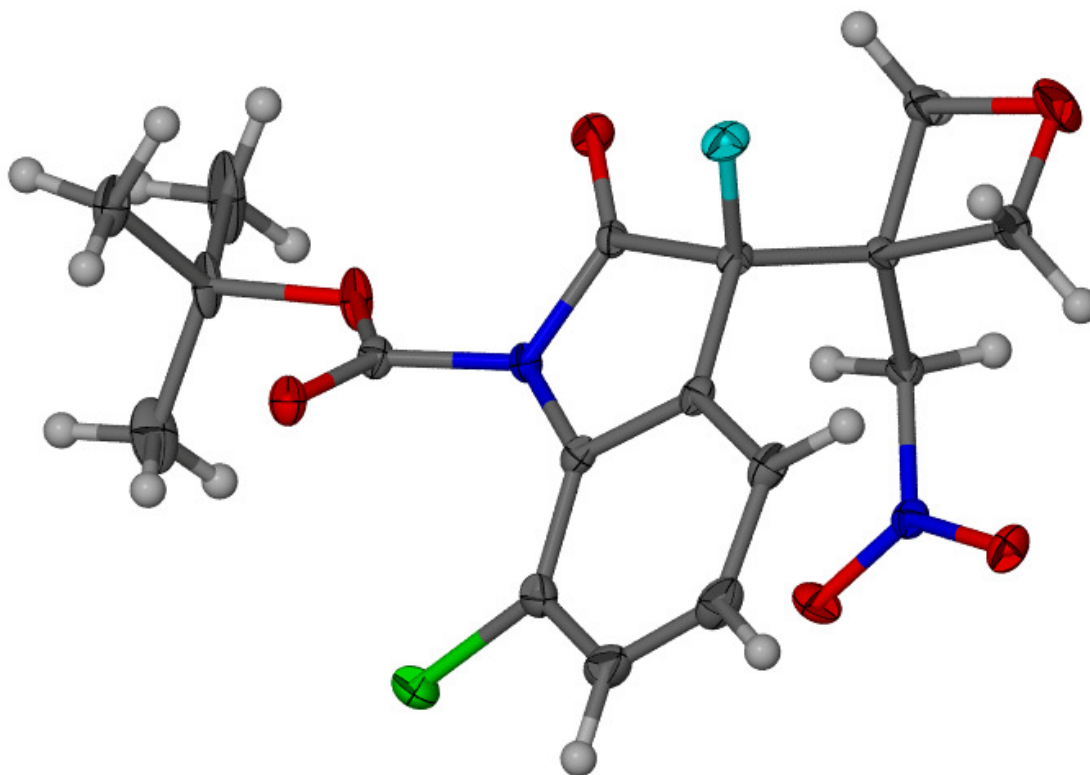

A single crystal was obtained by recrystallization of **3d** from ethanol. Single crystal X-ray analysis was performed at 273 K using a Siemens platform diffractometer with graphite monochromated Mo-K $\alpha$  radiation ( $\lambda = 0.71073$  Å). Data were integrated and corrected using the Apex 3 program. The structures were solved by direct methods and refined with full-matrix least-square analysis using SHELX-97-2 software. Non-hydrogen atoms were refined with anisotropic displacement parameter. Crystal data: C<sub>17</sub>H<sub>18</sub>ClFN<sub>2</sub>O<sub>6</sub>,  $M = 400.78$ , colorless block, 0.55 x 0.72 x 0.94 mm<sup>3</sup>, orthorhombic, space group  $P2_12_1$ ,  $a = 7.7160(15)$ ,  $b = 10.0892(19)$ ,  $c = 23.357(5)$  Å,  $V = 1818.3(6)$  Å<sup>3</sup>,  $Z = 4$ . Absolute structure parameter = 0.116(73) (Flack, H. D. *Acta Cryst.* **1983**, A39, 876-881).

## 6. Determination of the Relative Configuration of Compounds 10 and 13

A) Di-*tert*-butyl (2'*S*,3'*S*)-3'-nitro-2''-oxodispiro[azetidine-3,1'-cyclopropane-2',3''-indoline]-1,1''-dicarboxylate (**10**)

The  $^1\text{H}$  NMR signals of  $\text{H}_\text{A}$ ,  $\text{H}_\text{B}$ ,  $\text{H}_\text{C}$  and  $\text{H}_\text{D}$  in compound **10** were first assigned based on chemical shift and COSY analysis. The  $^1\text{H}$  NMR NOESY experiment showed that the tertiary proton  $\text{H}_\text{B}$  located at the cyclopropane ring has NOE's with the methylene protons  $\text{H}_\text{C}$  and  $\text{H}_\text{D}$  on one side of azetidine ring. The methylene proton  $\text{H}_\text{D}$  showed NOE with  $\text{H}_\text{A}$  at C4 in the oxindole ring. In agreement with these results, the *syn* relative configuration of the cyclopropane ring is shown below.

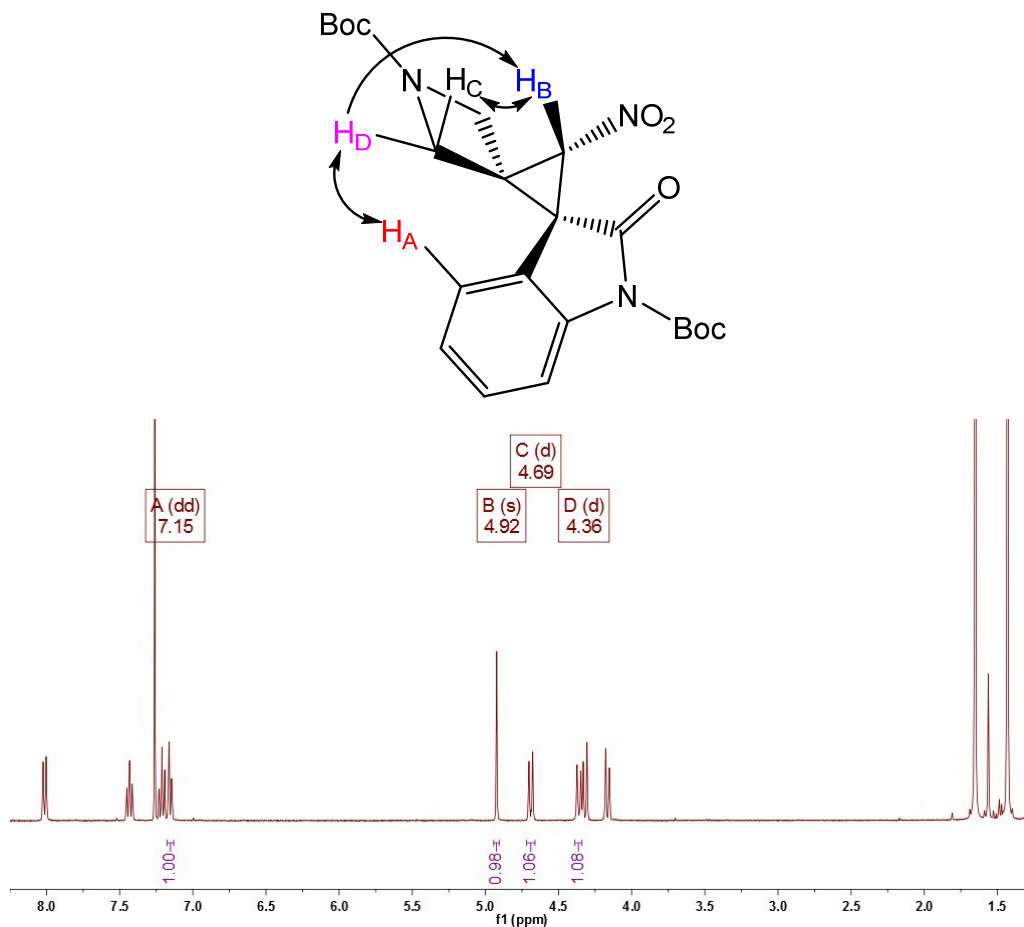

COSY spectrum of **10**

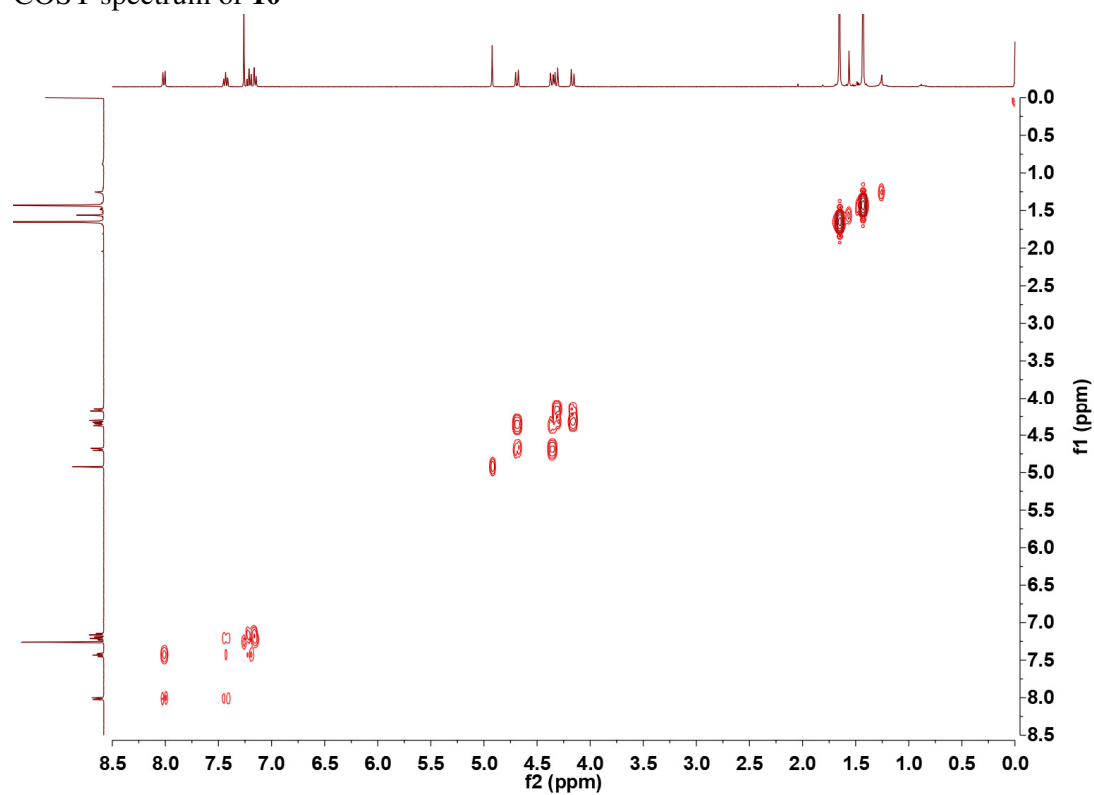

<sup>1</sup>H-<sup>1</sup>H NOESY spectrum of **10**

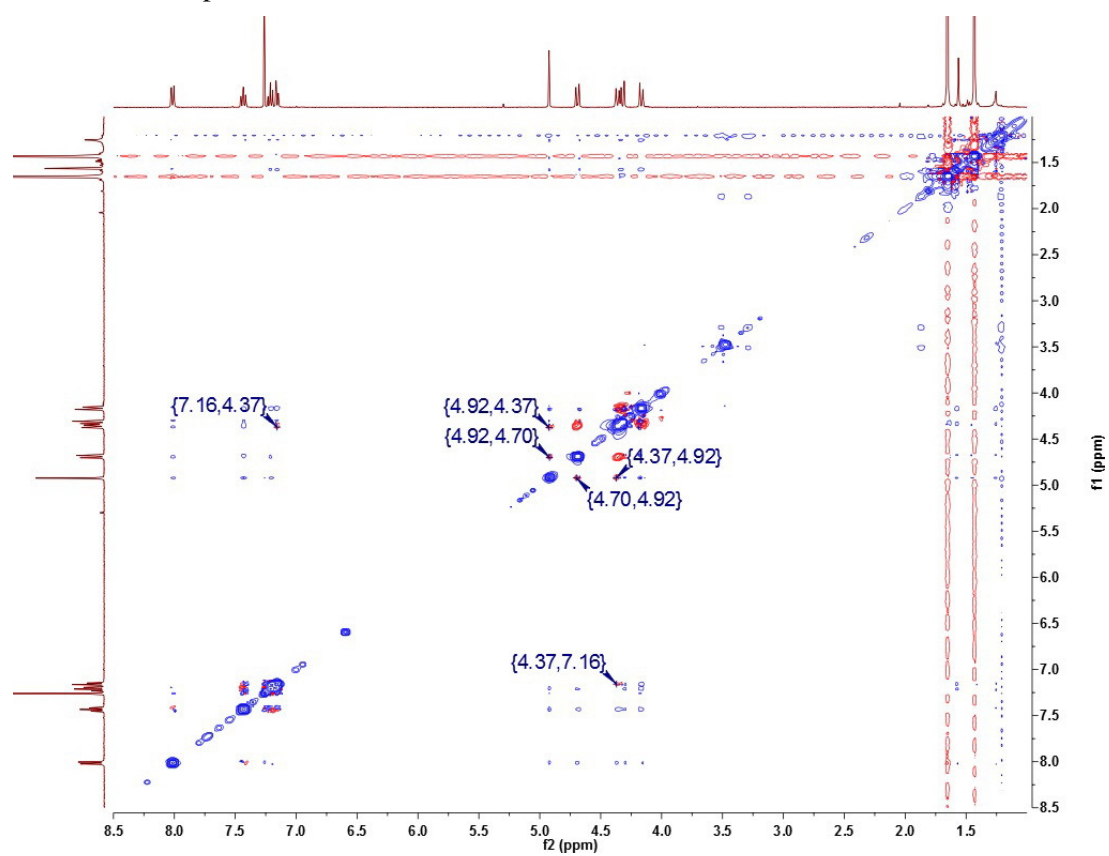



B) *tert*-Butyl (R)-3-((S)-1-(benzylthio)-3-hydroxy-2-(nitromethyl)propan-2-yl)-3-fluoro-2-oxindole-1-carboxylate (**13**)

The  $^1\text{H}$  NMR signals of  $\text{H}_\text{A}$ ,  $\text{H}_\text{B}$ ,  $\text{H}_\text{C}$ ,  $\text{H}_\text{D}$  and  $\text{H}_\text{E}$  in compound **13** were first assigned based on COSY analysis.  $^1\text{H}^1\text{H}$  NOESY and  $^1\text{H}^{19}\text{F}$  HOESY experiments were used to determine the nuclei with close contact. The methylene proton  $\text{H}_\text{B}$  on the  $\text{CH}_2\text{NO}_2$  group showed NOE's with the aromatic proton  $\text{H}_\text{A}$  at C4 in the oxindole ring and the hydroxyl proton  $\text{H}_\text{E}$  in the  $\text{CH}_2\text{OH}$  group. The fluorine nuclei (F) showed heteronuclear NOE's with the aromatic proton  $\text{H}_\text{A}$  at C4 in the oxindole ring, the methylene proton  $\text{H}_\text{C}$  in the  $\text{CH}_2\text{OH}$  group and the methylene proton  $\text{H}_\text{D}$  in the thioether group. In agreement with these results, the relative stereochemistry is shown below.

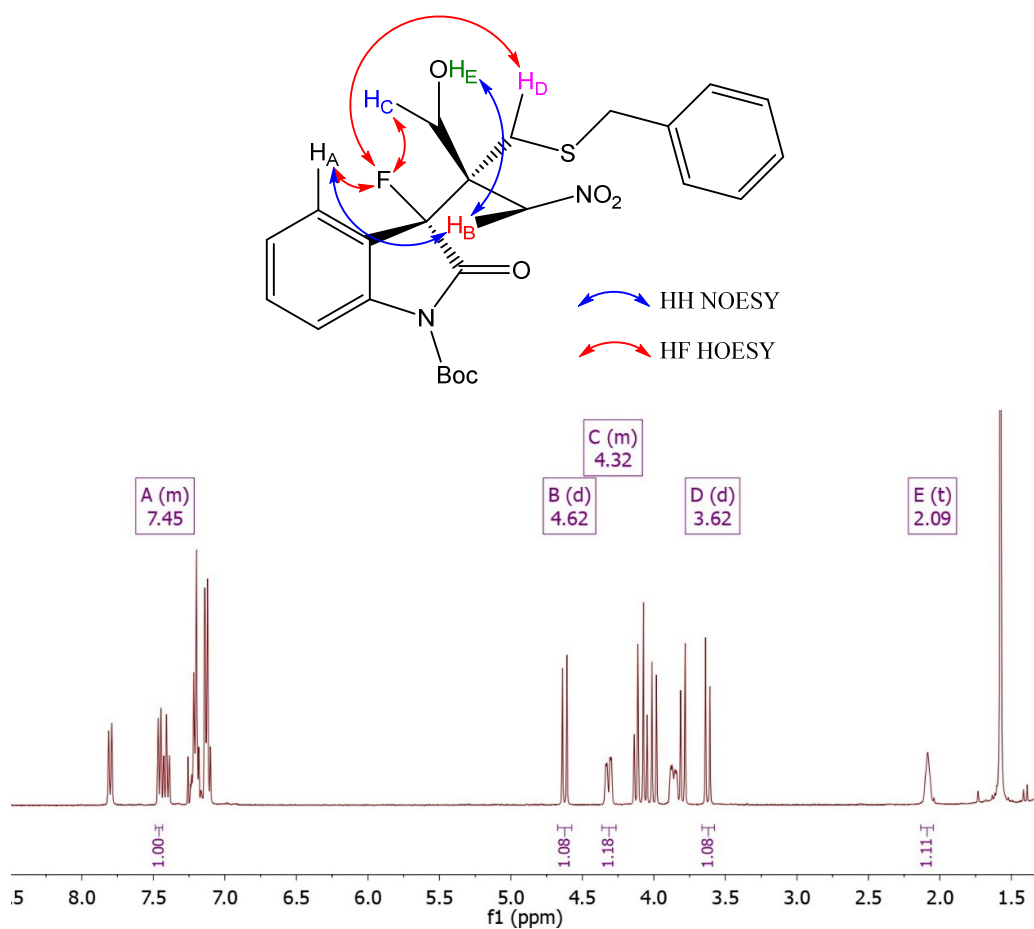

COSY spectrum of **13**

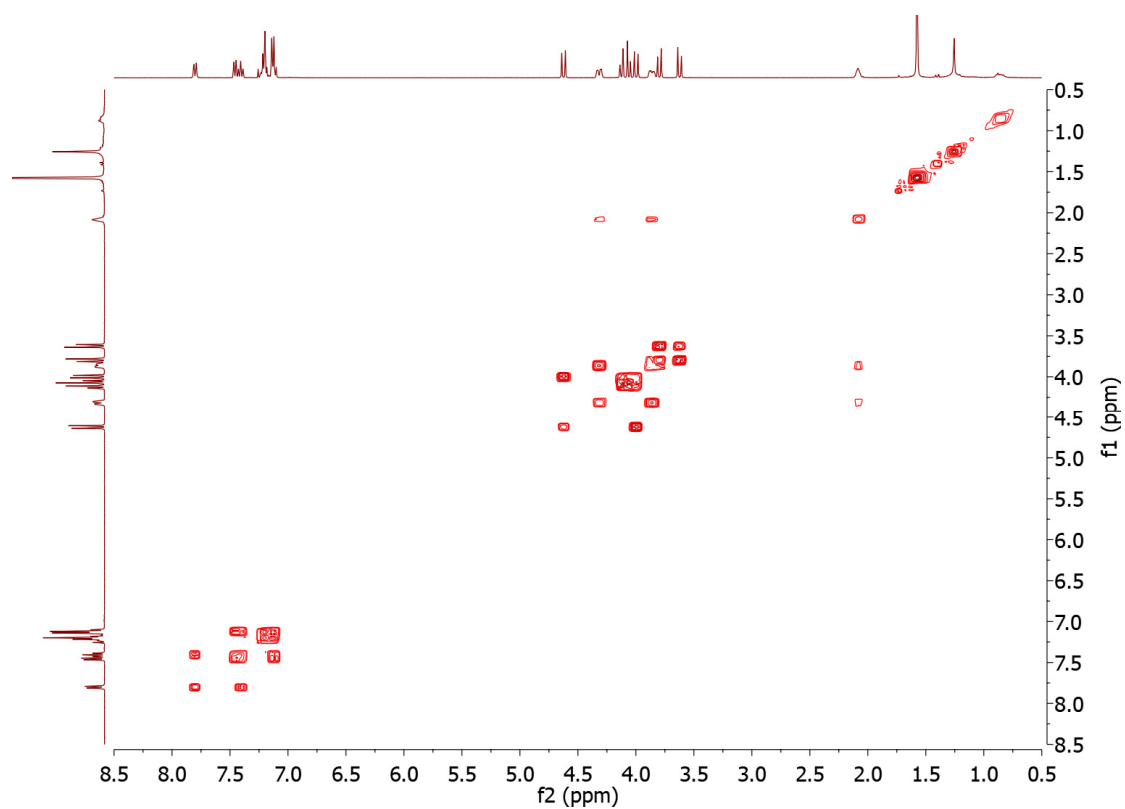

<sup>1</sup>H<sup>1</sup>H NOESY spectrum of **13**

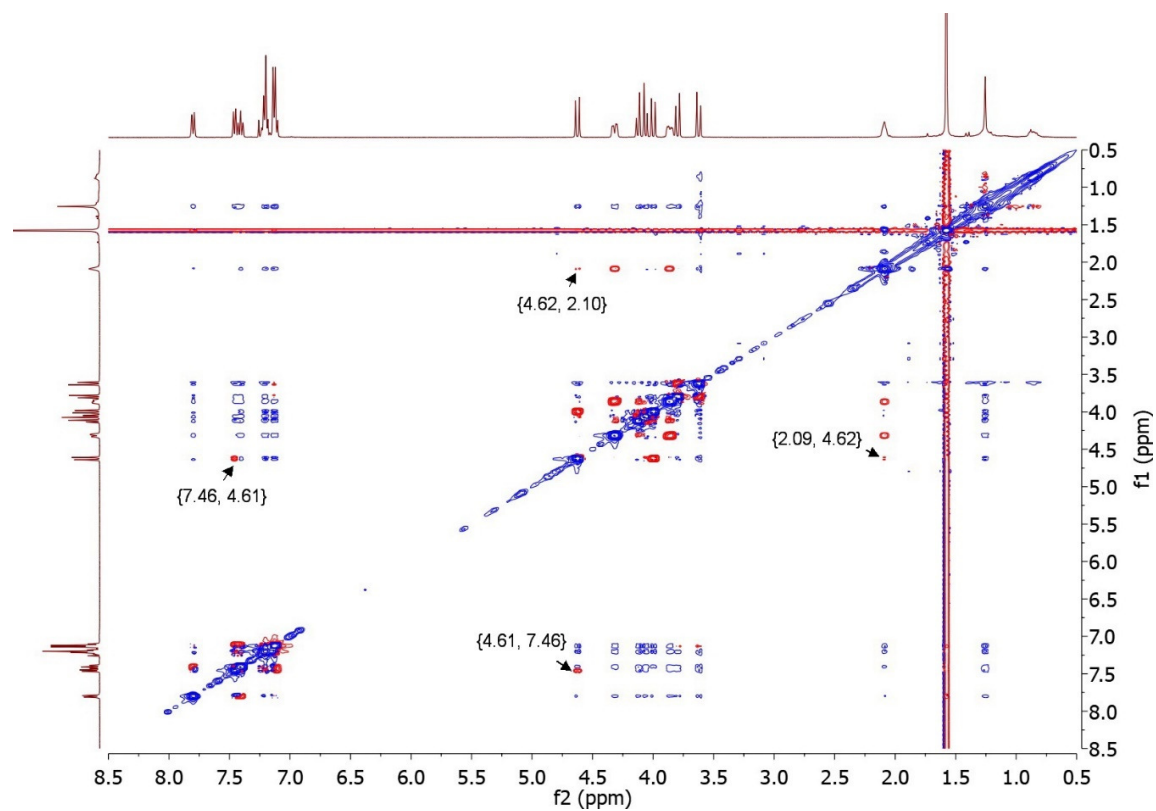

$^1\text{H}^1\text{F}$  HOESY spectrum of **13**

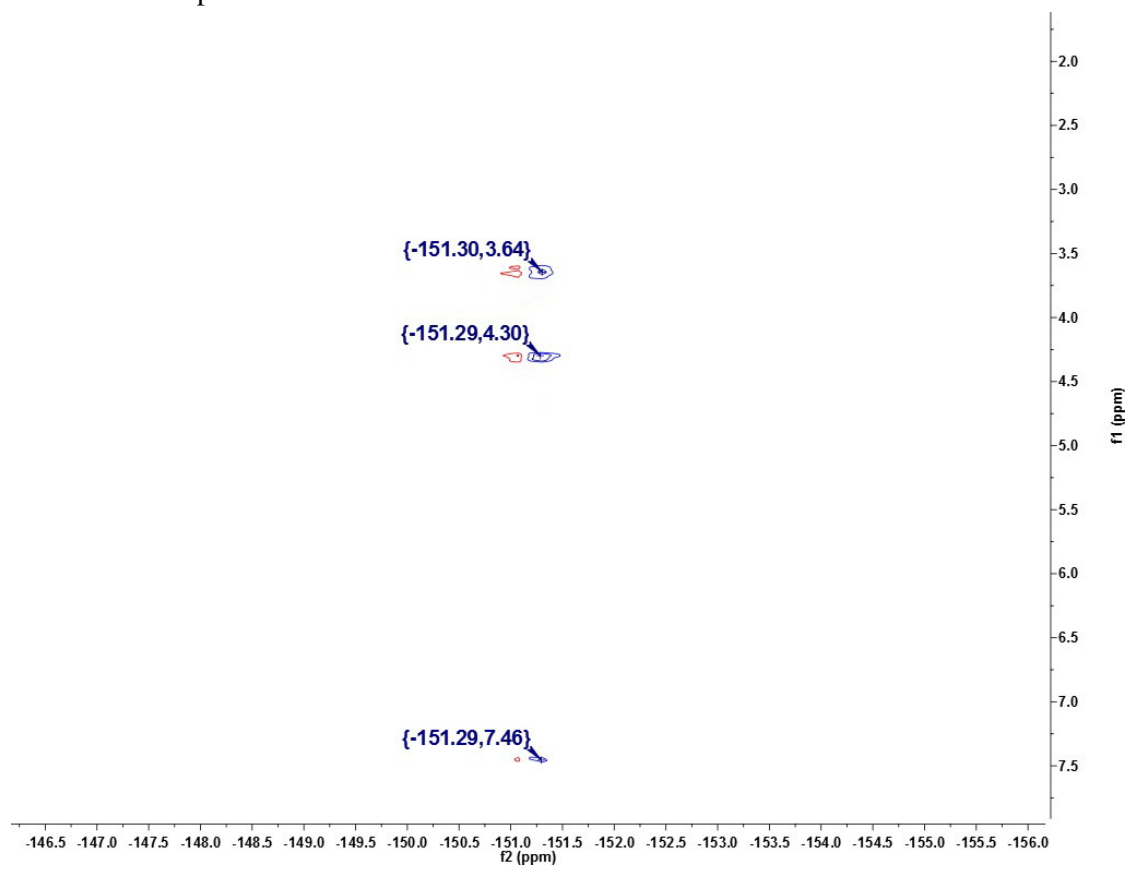

## 7. HPLC Chromatograms

*N*-Boc-3-fluoro-3-(3-(nitromethyl)oxetan-3-yl)-2-oxoindole (**rac-3a**)

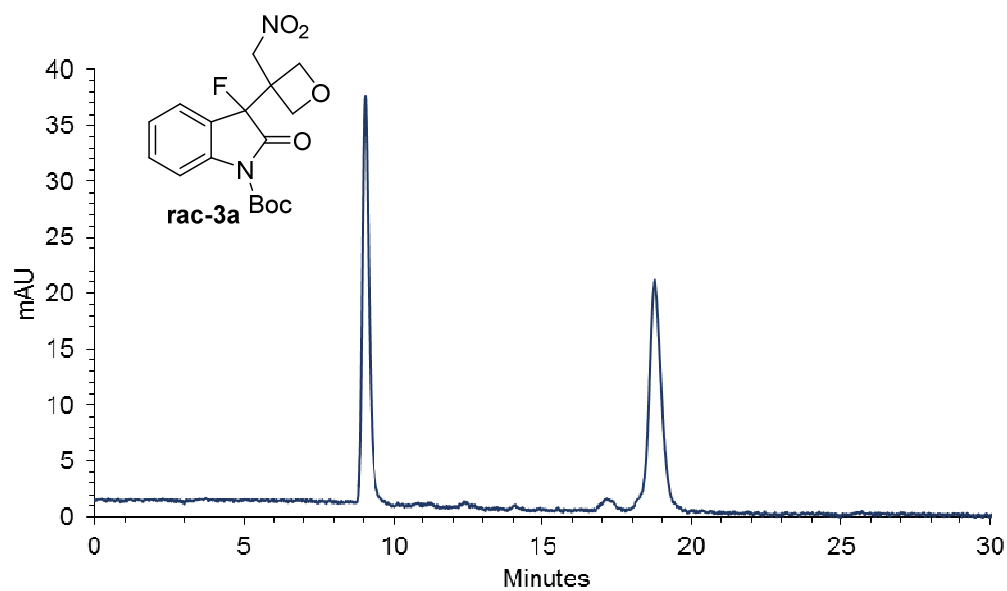

Signal 4: DAD1 D, Sig=221,4 Ref=550,100

| Ret. Time [min] | Area [mAU*s] | Area %  |
|-----------------|--------------|---------|
| 9.064           | 8346.76953   | 50.4613 |
| 18.763          | 8194.16406   | 49.5387 |

*N*-Boc-(*R*)-3-fluoro-3-(3-(nitromethyl)oxetan-3-yl)-2-oxoindole (**3a**)

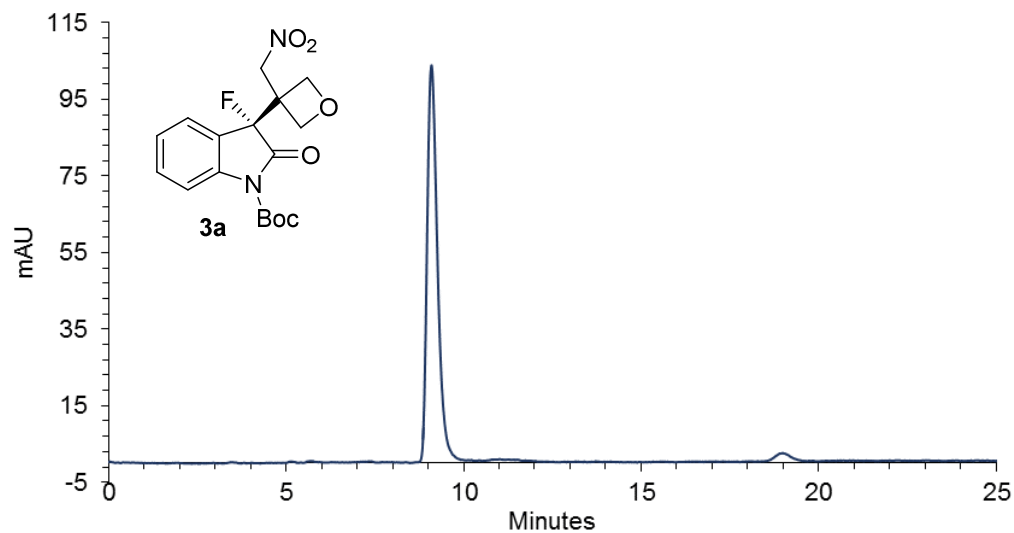

Signal 4: DAD1 D, Sig=221,4 Ref=550,100

| Ret. Time [min] | Area [mAU*s] | Area %  |
|-----------------|--------------|---------|
| 9.092           | 3.20732E+04  | 97.5408 |
| 18.975          | 808.61774    | 2.4592  |

*N*-Boc-3-fluoro-3-(*N*-Cbz-3-(nitromethyl)azetidin-3-yl)-2-oxoindole (**rac-3b**)

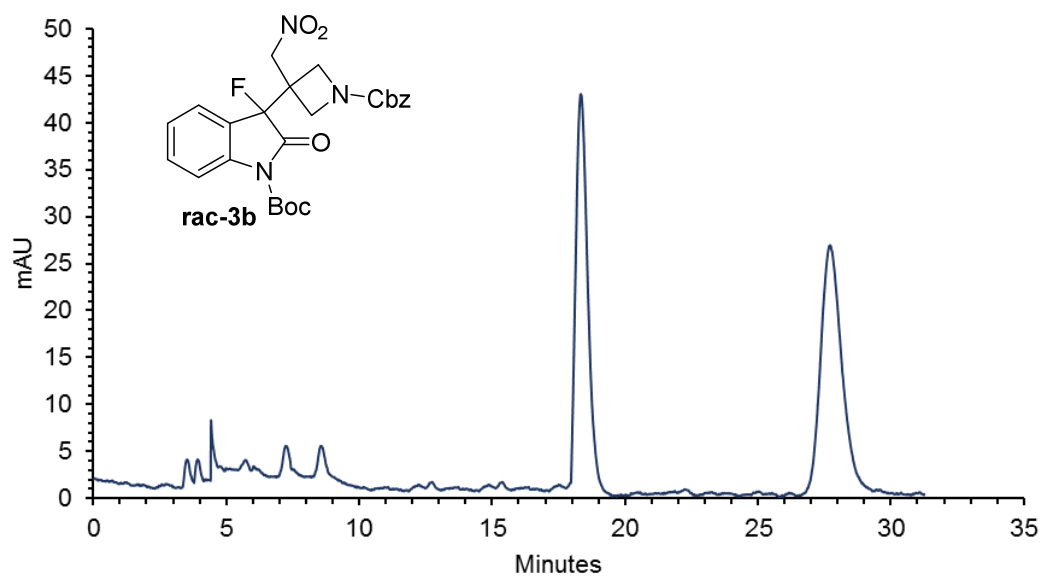

Signal 1: DAD1 A, Sig=254,4 Ref=550,100

| Ret. Time [min] | Area [mAU*s] | Area %  |
|-----------------|--------------|---------|
| 18.343          | 2247.52417   | 48.1238 |
| 27.721          | 2422.77332   | 51.8762 |

*N*-Boc-(*S*)-3-fluoro-3-(*N*-Cbz-3-(nitromethyl)azetidin-3-yl)-2-oxoindole (**3b**)

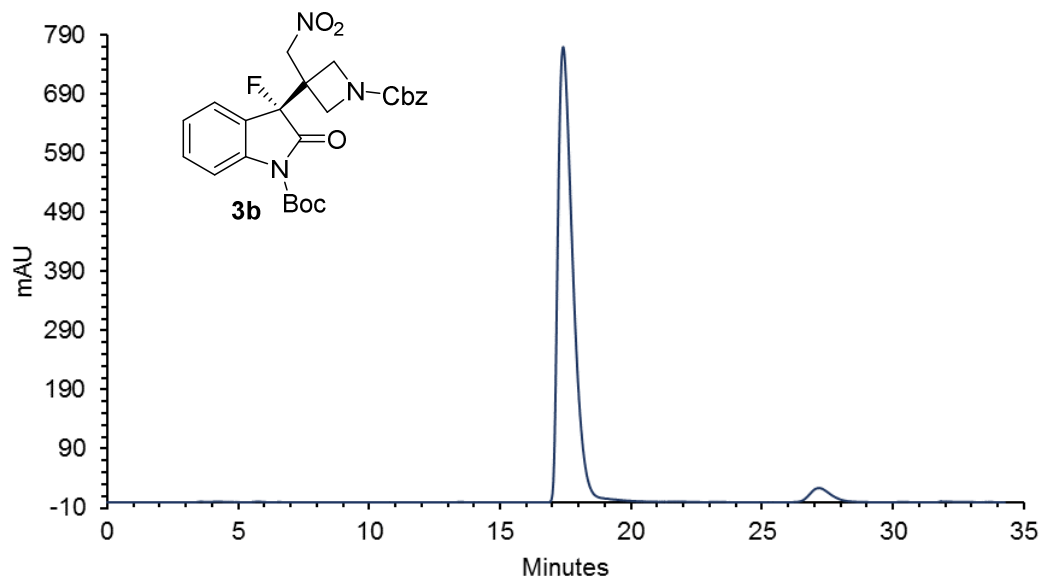

Signal 1: DAD1 A, Sig=254,4 Ref=550,100

| Ret. Time [min] | Area [mAU*s] | Area %  |
|-----------------|--------------|---------|
| 17.393          | 4884.85010   | 95.9192 |
| 27.120          | 207.82164    | 4.0808  |

*N*-Boc-6-chloro-3-fluoro-3-(3-(nitromethyl)oxetan-3-yl)-2-oxindole (**rac-3c**)

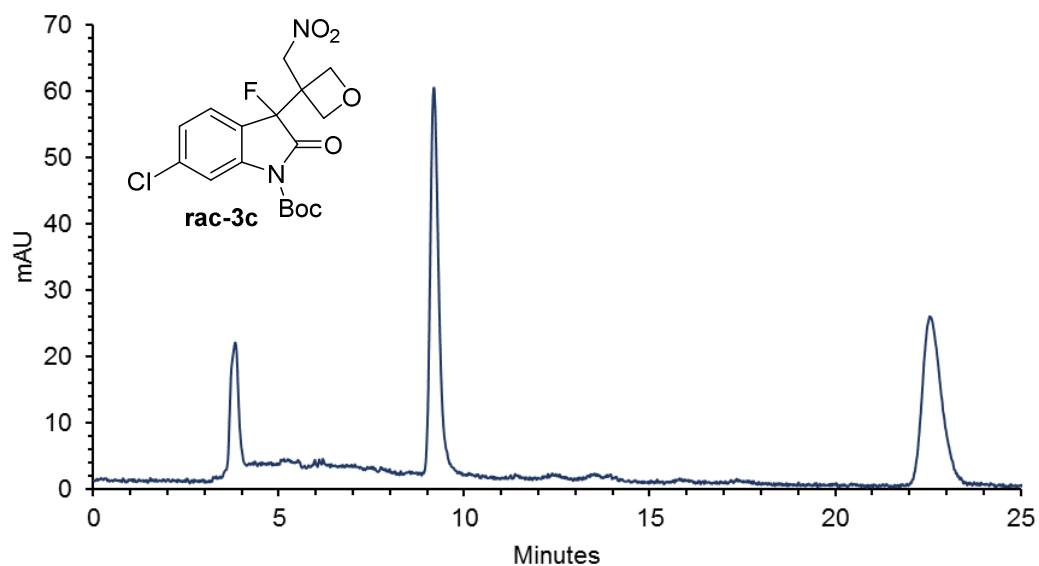

*N*-Boc-(*R*)-6-chloro-3-fluoro-3-(3-(nitromethyl)oxetan-3-yl)-2-oxindole (**3c**)

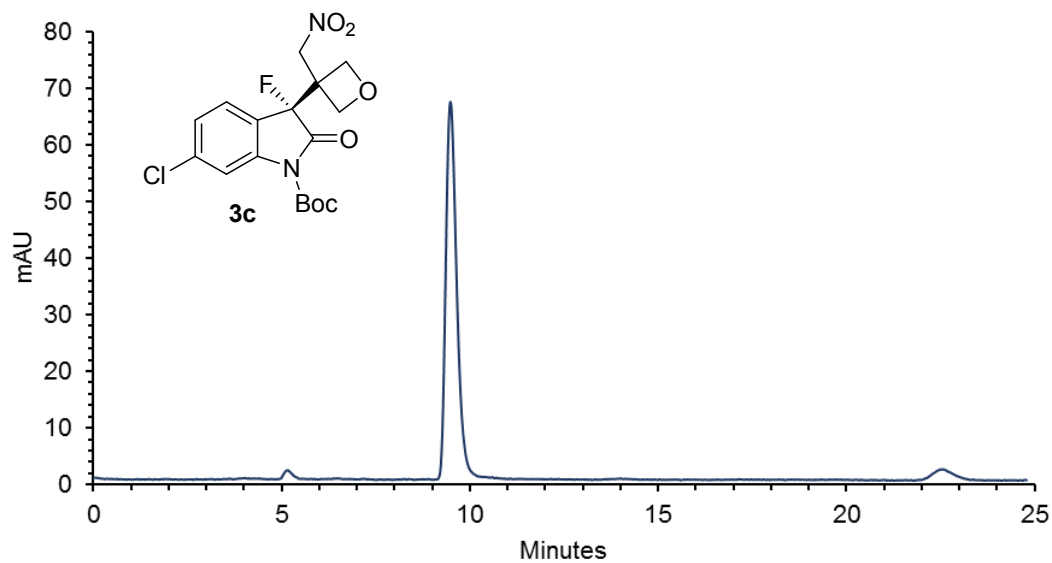

*N*-Boc-7-chloro-3-fluoro-3-(3-(nitromethyl)oxetan-3-yl)-2-oxindole (**rac-3d**)

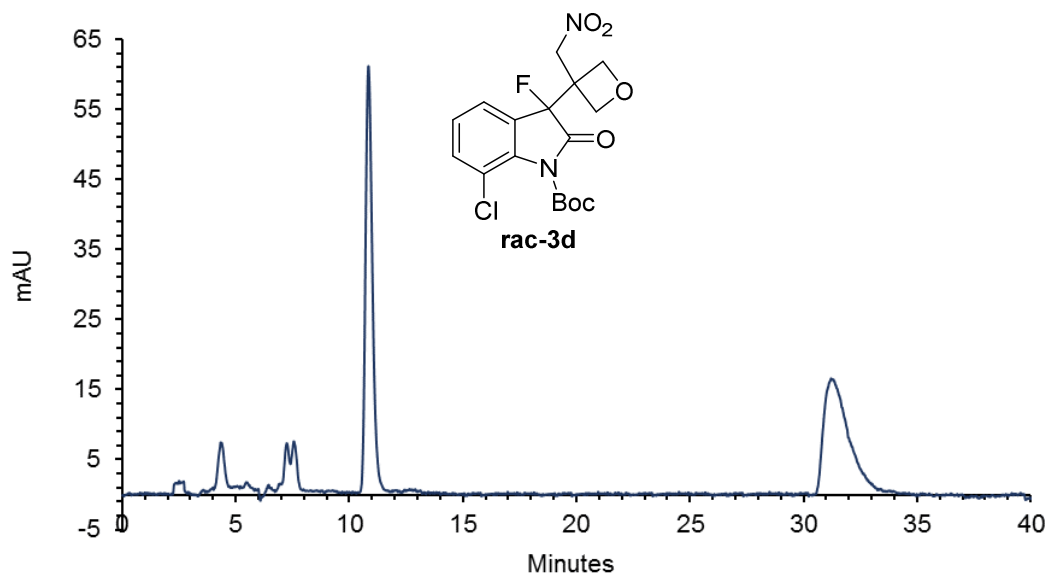

*N*-Boc-(*R*)-7-chloro-3-fluoro-3-(3-(nitromethyl)oxetan-3-yl)-2-oxindole (**3d**)

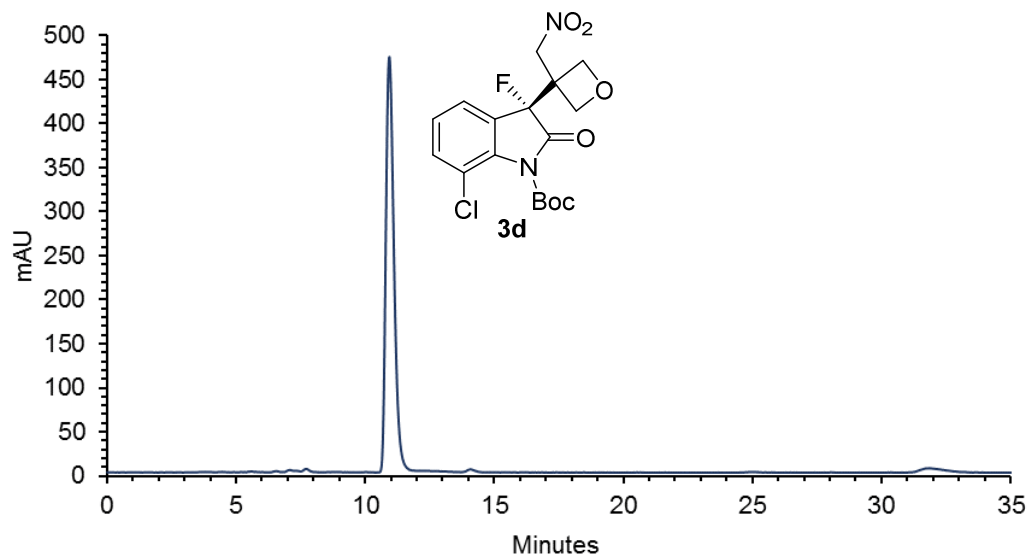

*N*-Boc-3,5-difluoro-3-(3-(nitromethyl)oxetan-3-yl)-2-oxindole (**rac-3e**)

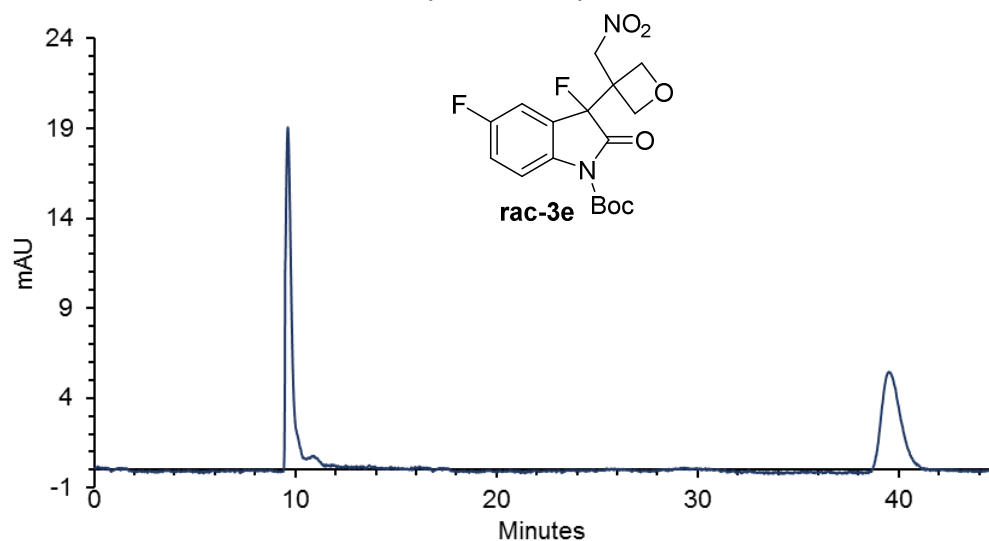

Signal 1: DAD1 A, Sig=254,4 Ref=550,100

| Ret. Time [min] | Area [mAU*s] | Area %  |
|-----------------|--------------|---------|
| 9.615           | 376.40601    | 52.9430 |
| 39.525          | 334.55905    | 47.0570 |

*N*-Boc-(*R*)-3,5-difluoro-3-(3-(nitromethyl)oxetan-3-yl)-2-oxindole (**3e**)

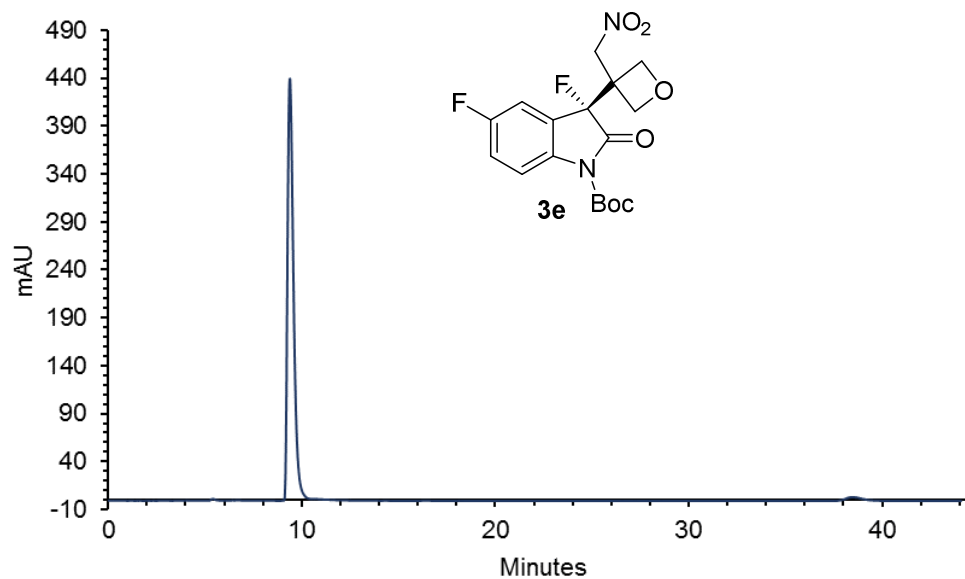

Signal 1: DAD1 A, Sig=254,4 Ref=550,100

| Ret. Time [min] | Area [mAU*s] | Area %  |
|-----------------|--------------|---------|
| 9.394           | 9468.01465   | 97.9407 |
| 38.383          | 199.07681    | 2.0593  |



*N*-Boc-5-bromo-3-fluoro-3-(3-(nitromethyl)oxetan-3-yl)-2-oxoindole (**rac-3f**)

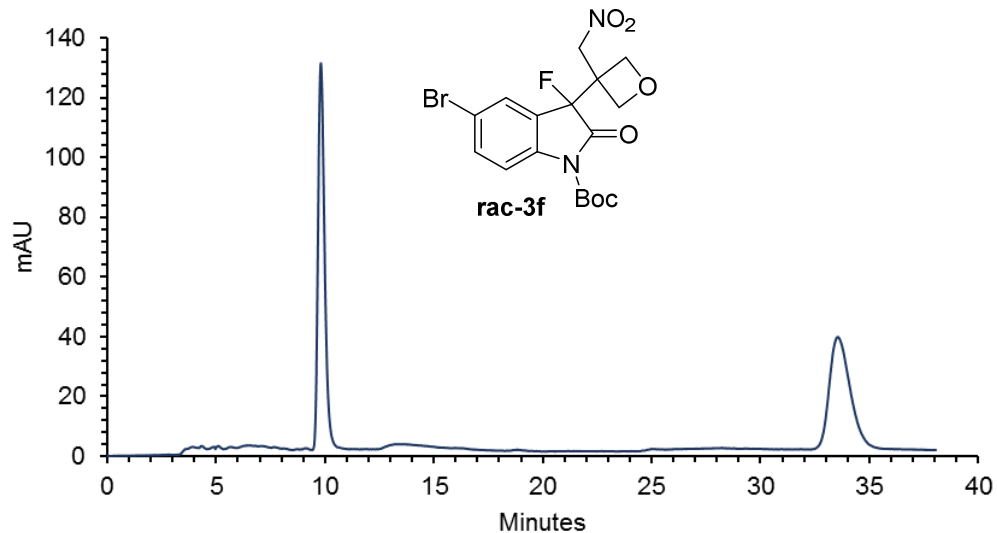

Signal 3: DAD1 C, Sig=243,4 Ref=550,100

| Ret. Time [min] | Area [mAU*s] | Area %  |
|-----------------|--------------|---------|
| 9.801           | 2680.43262   | 52.3143 |
| 33.535          | 2443.27734   | 47.6857 |

*N*-Boc-(*R*)-5-bromo-3-fluoro-3-(3-(nitromethyl)oxetan-3-yl)-2-oxoindole (**3f**)

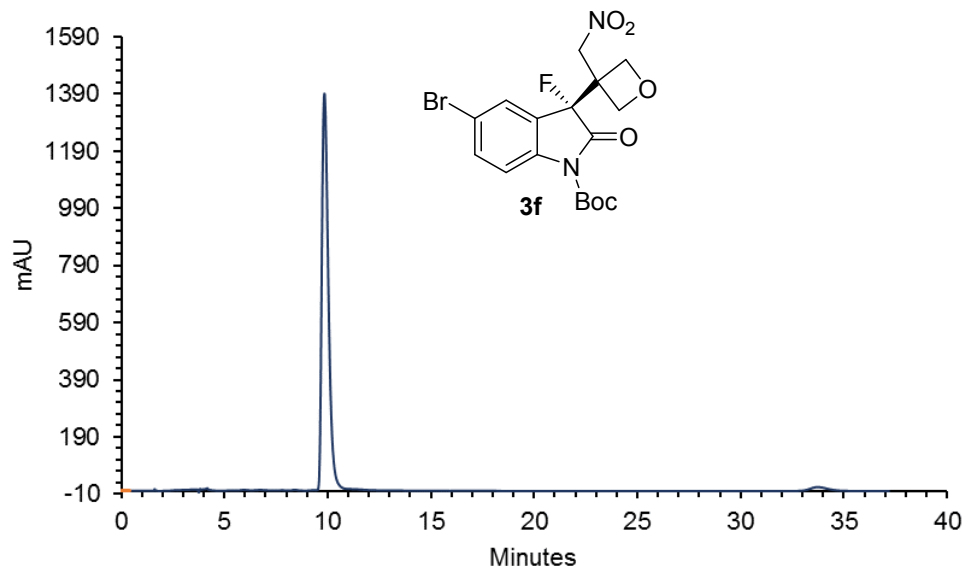

Signal 3: DAD1 C, Sig=243,4 Ref=550,100

| Ret. Time [min] | Area [mAU*s] | Area %  |
|-----------------|--------------|---------|
| 9.820           | 3.05083E+04  | 97.5068 |
| 33.724          | 780.09155    | 2.4932  |

Methyl *N*-Boc-3-fluoro-3-(3-(nitromethyl)oxetan-3-yl)-2-oxindole-6-carboxylate (**rac-3g**)

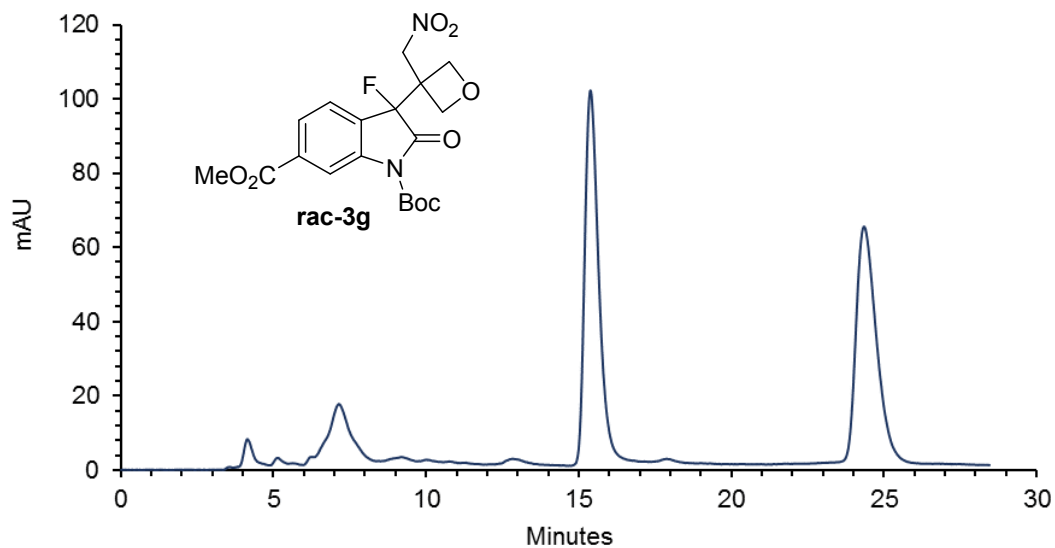

Signal 3: DAD1 C, Sig=243,4 Ref=550,100

| Ret. Time [min] | Area [mAU*s] | Area %  |
|-----------------|--------------|---------|
| 15.387          | 3154.85596   | 51.9750 |
| 24.353          | 2915.09644   | 48.0250 |

Methyl *N*-Boc-(R)-3-fluoro-3-(3-(nitromethyl)oxetan-3-yl)-2-oxindole-6-carboxylate (**3g**)

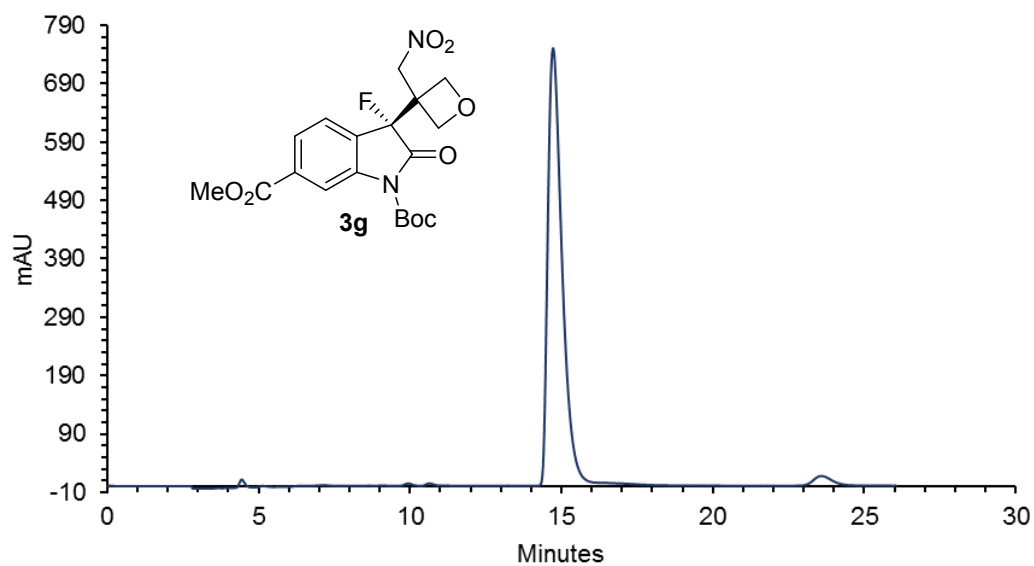

Signal 3: DAD1 C, Sig=243,4 Ref=550,100

| Ret. Time [min] | Area [mAU*s] | Area %  |
|-----------------|--------------|---------|
| 14.72           | 2.47417E+04  | 97.2327 |
| 23.581          | 704.15558    | 2.7673  |

*N*-Boc-6-trifluoromethyl-3-fluoro-3-(3-(nitromethyl)oxetan-3-yl)-2-oxindole (**rac-3h**)

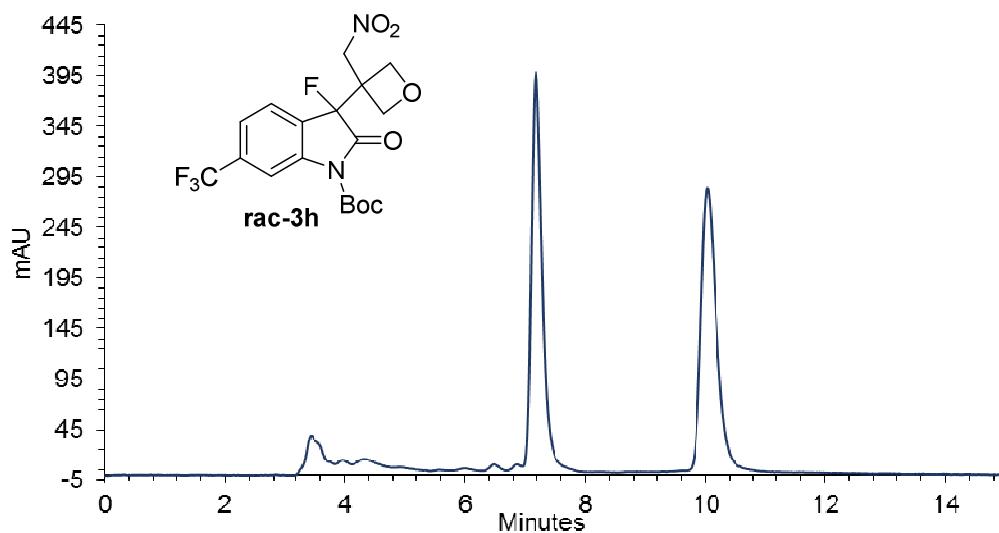

Signal 2: DAD1 B, Sig=230,4 Ref=550,100

| Ret. Time [min] | Area [mAU*s] | Area %  |
|-----------------|--------------|---------|
| 7.179           | 5113.88818   | 49.6032 |
| 10.037          | 5195.71289   | 50.3968 |

*N*-Boc-(*R*)-6-trifluoromethyl-3-fluoro-3-(3-(nitromethyl)oxetan-3-yl)-2-oxindole (**3h**)

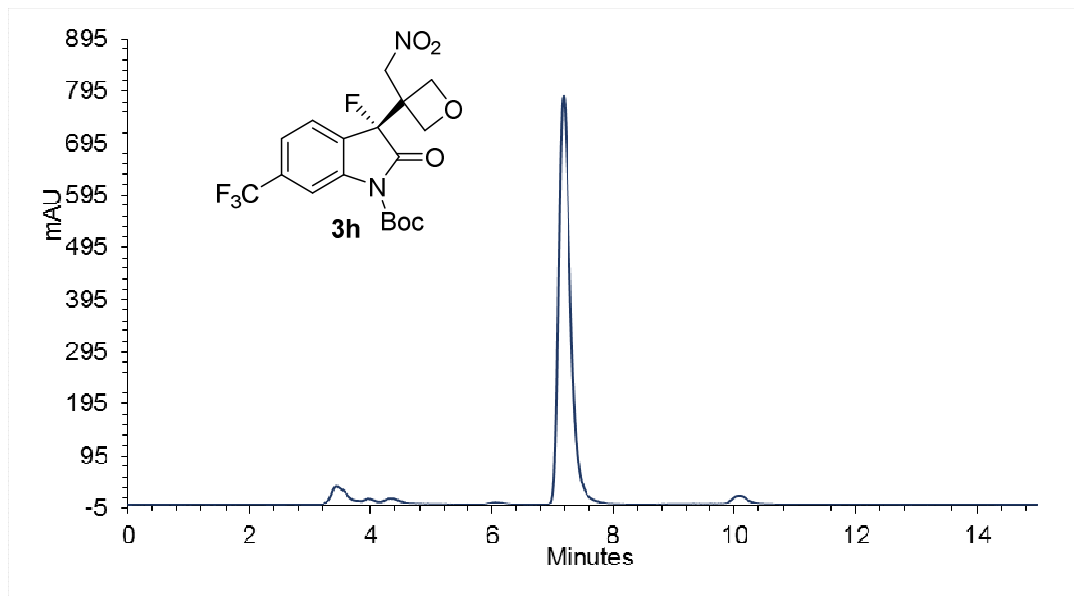

Signal 2: DAD1 B, Sig=230,4 Ref=550,100

| Ret. Time [min] | Area [mAU*s] | Area %  |
|-----------------|--------------|---------|
| 7.178           | 1.06681E+04  | 97.9678 |
| 10.088          | 221.29810    | 2.0322  |

*N*-Boc-5-nitro-3-fluoro-3-(3-(nitromethyl)oxetan-3-yl)-2-oxindole (**rac-3i**)

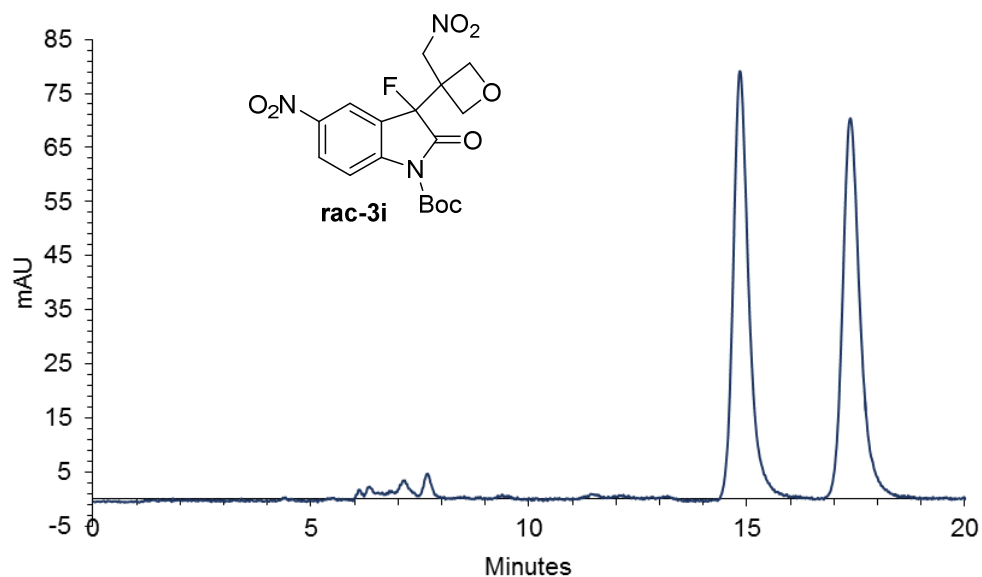

Signal 1: DAD1 A, Sig=254,4 Ref=550,100

| Ret. Time [min] | Area [mAU*s] | Area %  |
|-----------------|--------------|---------|
| 13.791          | 1938.41724   | 49.6021 |
| 16.325          | 1969.51978   | 50.3979 |

*N*-Boc-(*R*)-5-nitro-3-fluoro-3-(3-(nitromethyl)oxetan-3-yl)-2-oxindole (**3i**)

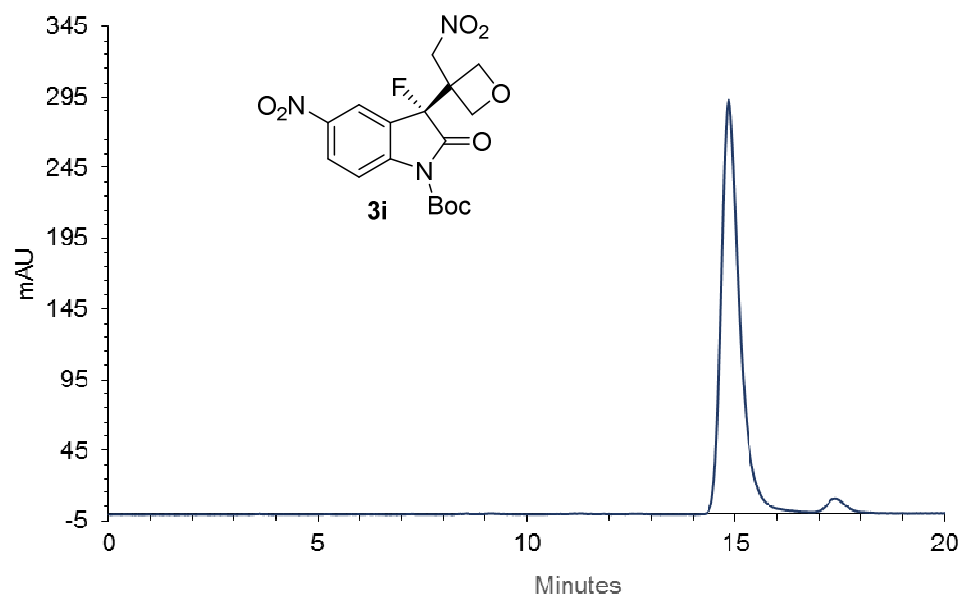

Signal 1: DAD1 A, Sig=254,4 Ref=550,100

| Ret. Time [min] | Area [mAU*s] | Area %  |
|-----------------|--------------|---------|
| 14.837          | 8915.25488   | 96.7233 |
| 17.383          | 302.02209    | 3.2767  |

*N*-Boc-5-methoxy-3-fluoro-3-(3-(nitromethyl)oxetan-3-yl)-2-oxindole (**rac-3j**)

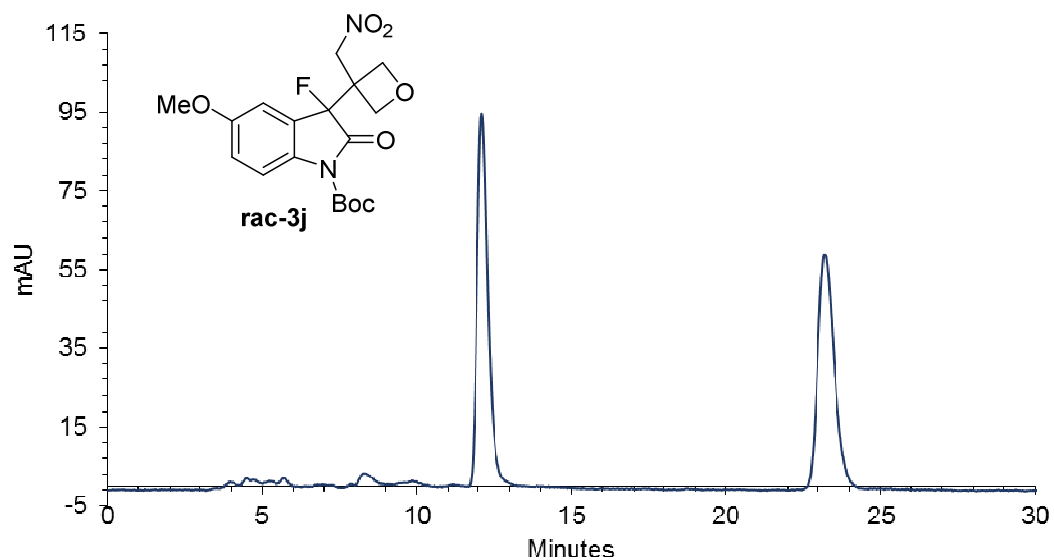

*N*-Boc-(*R*)-5-methoxy-3-fluoro-3-(3-(nitromethyl)oxetan-3-yl)-2-oxindole (**3j**)

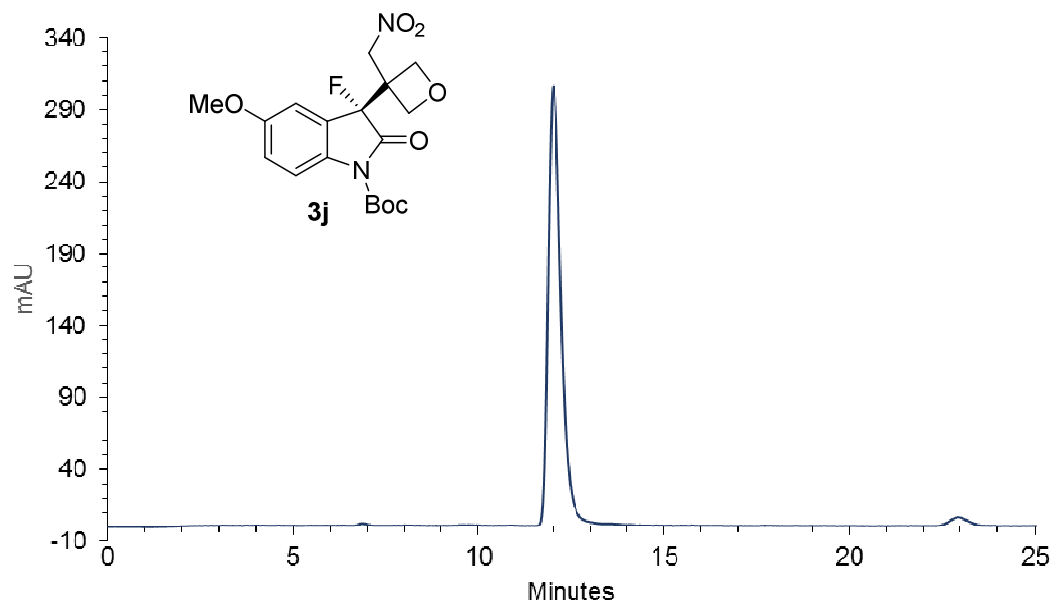

*N*-Boc-3-fluoro-3-(*N*-Boc-3-(nitromethyl)azetidin-3-yl)-2-oxoindole (**rac-3k**)

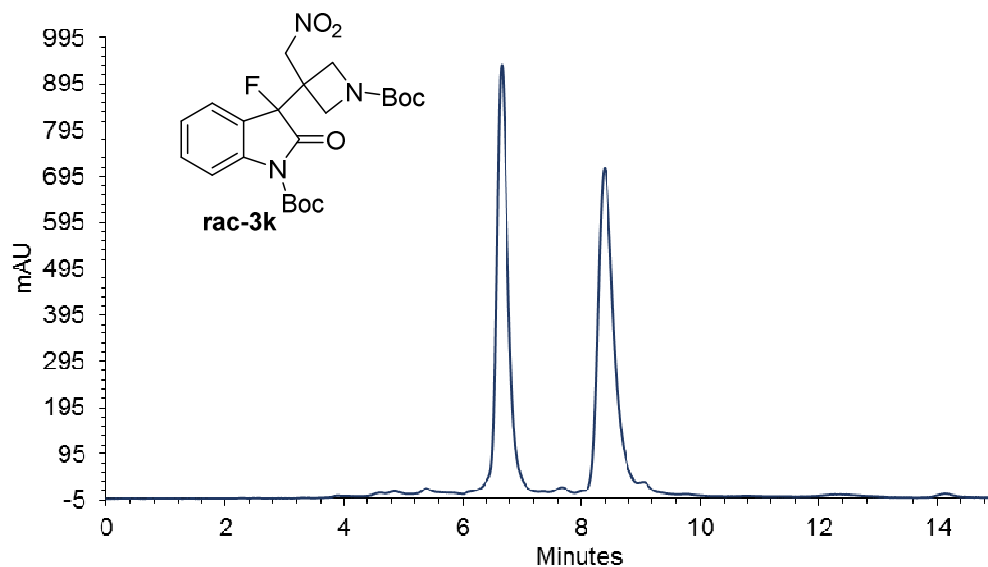

Signal 1: DAD1 A, Sig=254,4 Ref=550,100

| Ret. Time [min] | Area [mAU*s] | Area %  |
|-----------------|--------------|---------|
| 6.655           | 2351.03723   | 50.5242 |
| 8.392           | 2302.24927   | 49.4758 |

*N*-Boc-(*S*)-3-fluoro-3-(*N*-Boc-3-(nitromethyl)azetidin-3-yl)-2-oxoindole (**3k**)

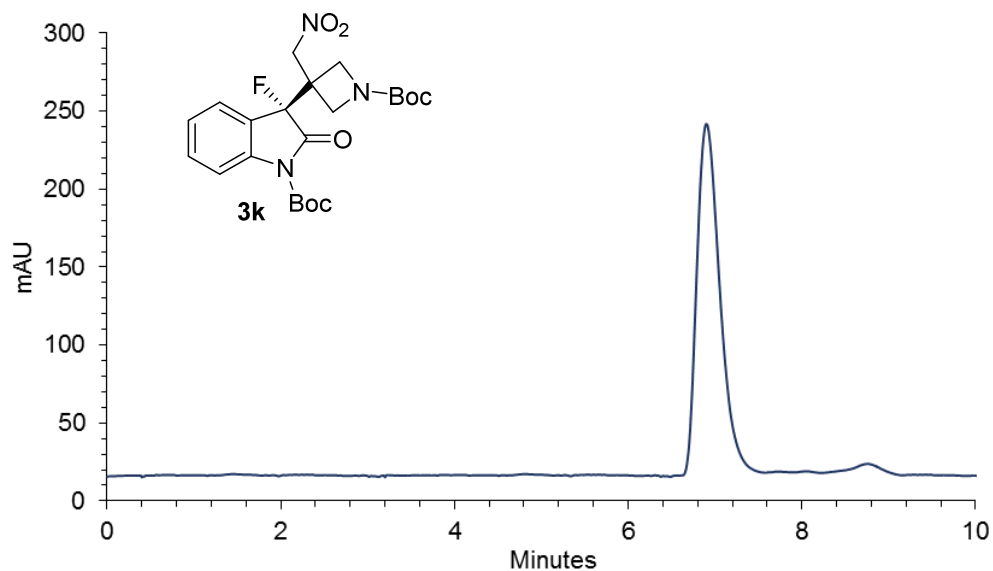

Signal 1: DAD1 A, Sig=254,4 Ref=550,100

| Ret. Time [min] | Area [mAU*s] | Area %  |
|-----------------|--------------|---------|
| 6.899           | 4222.46387   | 96.8449 |
| 8.760           | 137.56226    | 3.1551  |

*N*-Boc-5-bromo-3-fluoro-3-(*N*-Boc-3-(nitromethyl)azetidin-3-yl)-2-oxoindole (**rac-3I**)

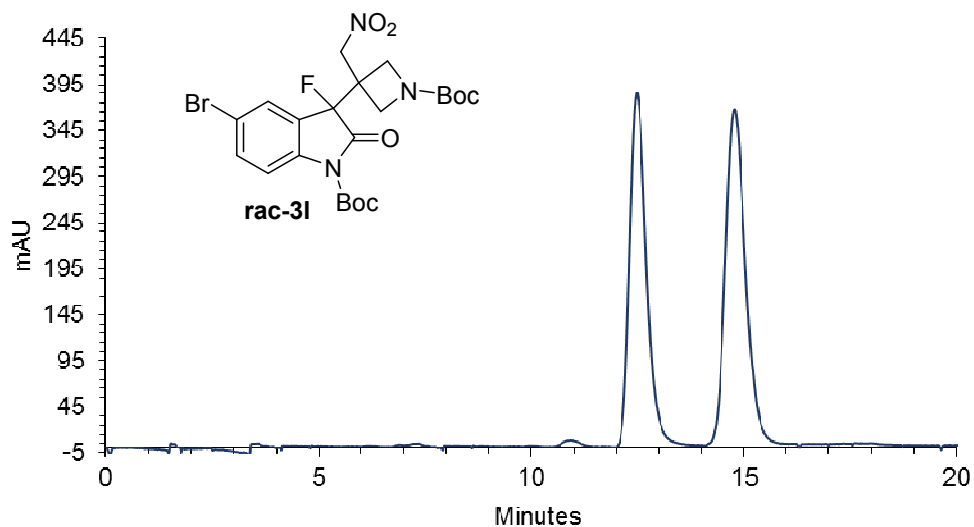

*N*-Boc-(*S*)-5-bromo-3-fluoro-3-(*N*-Boc-3-(nitromethyl)azetidin-3-yl)-2-oxoindole (**3I**)

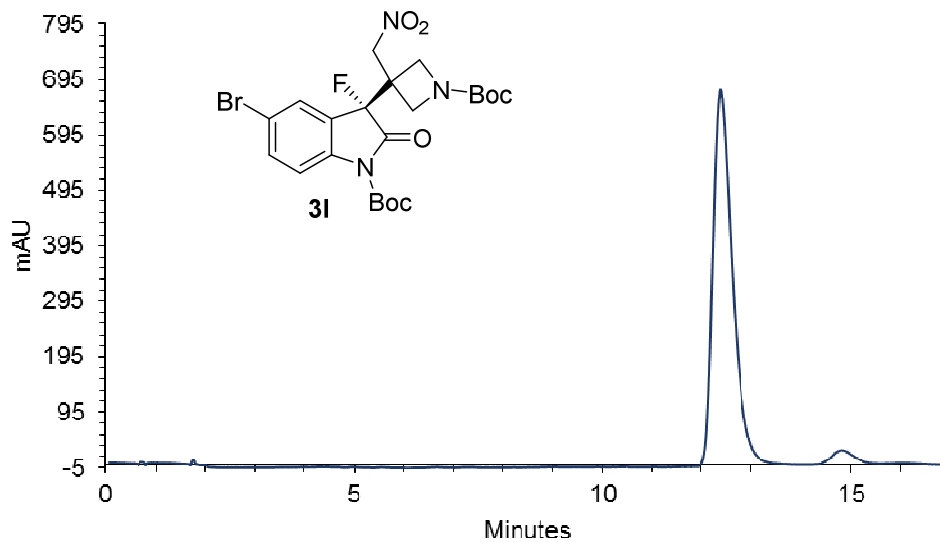

Methyl *N*-Boc-3-fluoro-3-(*N*-Cbz-3-(nitromethyl)azetidin-3-yl)-2-oxoindole-6-carboxylate (**rac-3m**)

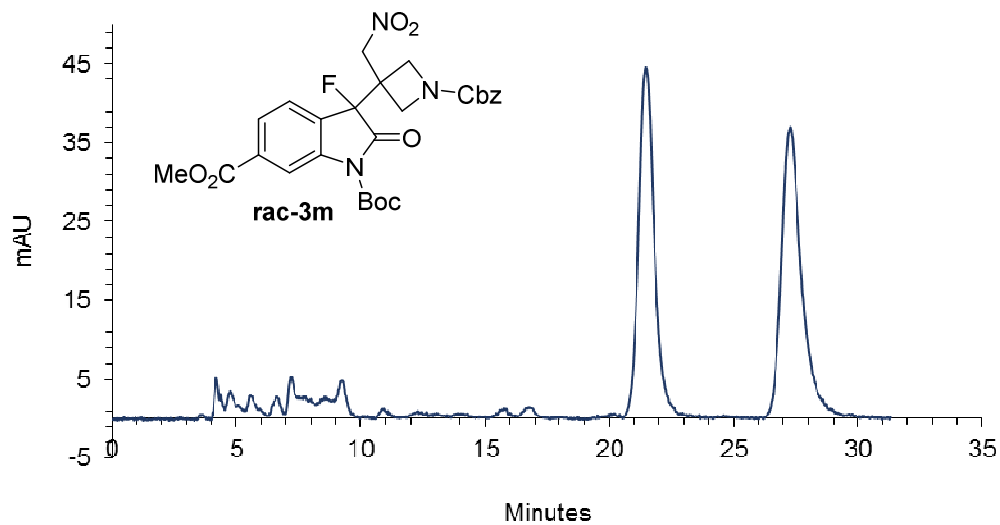

Signal 4: DAD1 D, Sig=245,4 Ref=550,100

| Ret. Time [min] | Area [mAU*s] | Area %  |
|-----------------|--------------|---------|
| 21.469          | 1920.67400   | 48.4998 |
| 27.269          | 2039.49500   | 51.5002 |

Methyl *N*-Boc-(*S*)-3-fluoro-3-(*N*-Cbz-3-(nitromethyl)azetidin-3-yl)-2-oxoindole-6-carboxylate (**3m**)

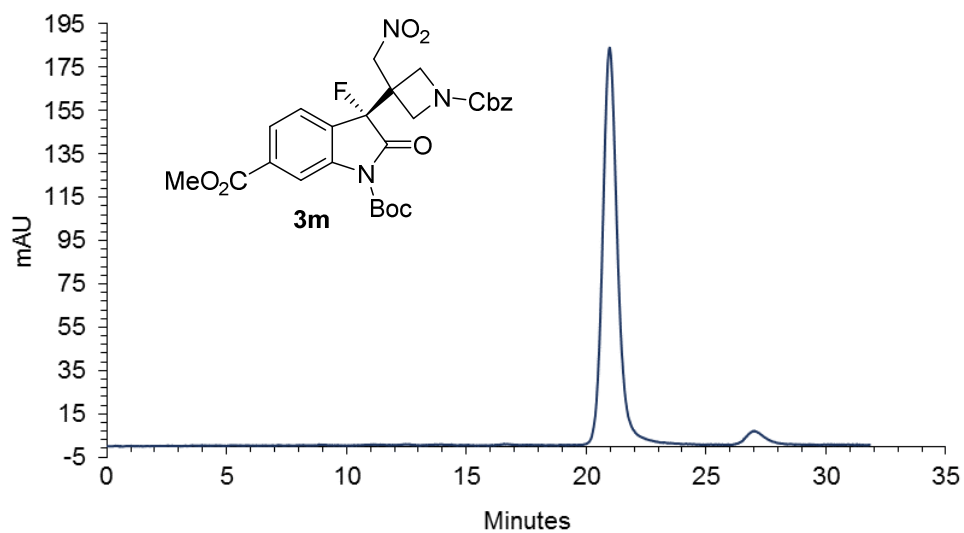

Signal 4: DAD1 D, Sig=245,4 Ref=550,100

| Ret. Time [min] | Area [mAU*s] | Area %  |
|-----------------|--------------|---------|
| 20.973          | 7737.50200   | 96.2193 |
| 27.011          | 304.03010    | 3.7807  |



*N*-Boc-3-chloro-3-(3-(nitromethyl)oxetan-3-yl)-2-oxoindole (**rac-5a**)

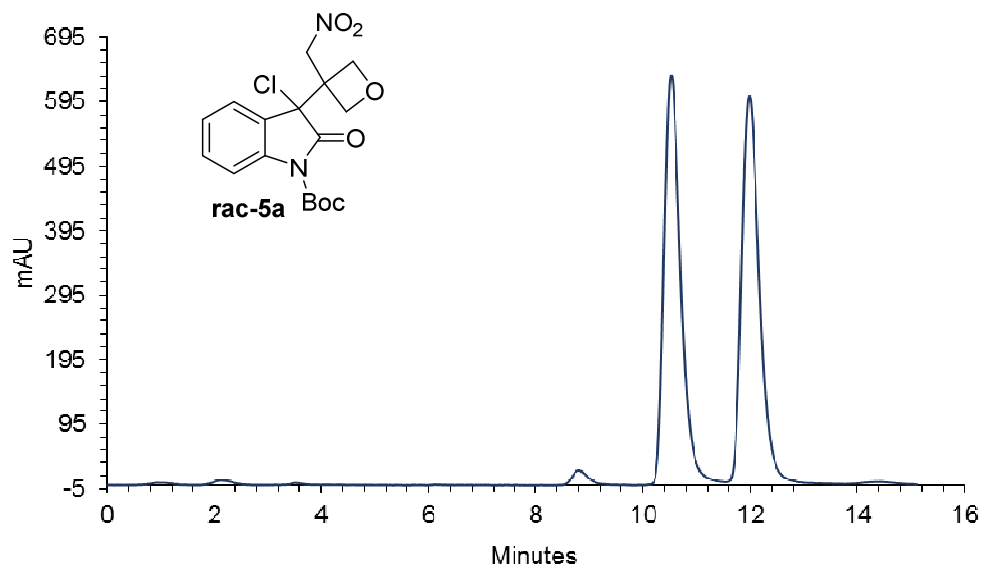

*N*-Boc-(*R*)-3-chloro-3-(3-(nitromethyl)oxetan-3-yl)-2-oxoindole (**5a**)

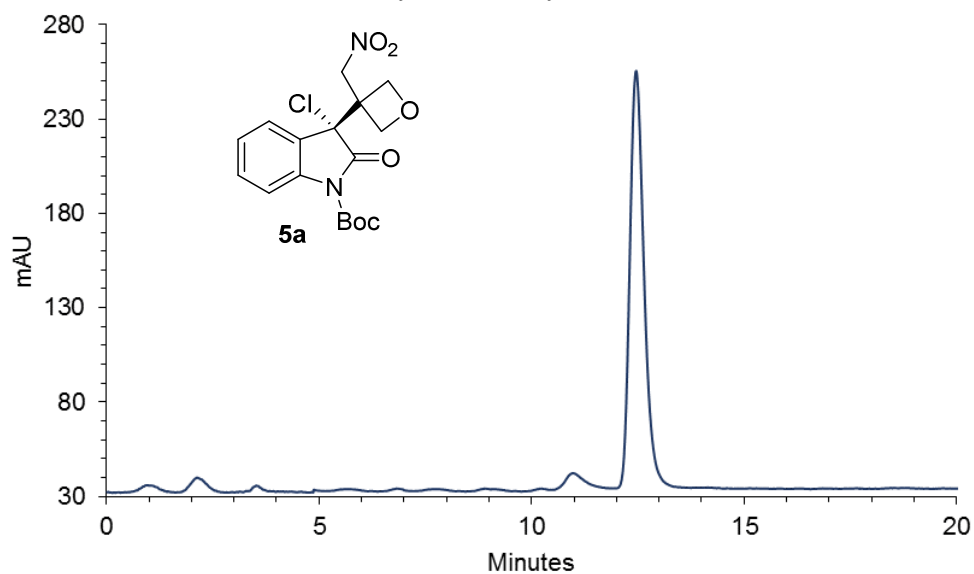

*N*-Boc-3-chloro-3-(*N*-Boc-3-(nitromethyl)azetidin-3-yl)-2-oxindole (**rac-5b**)

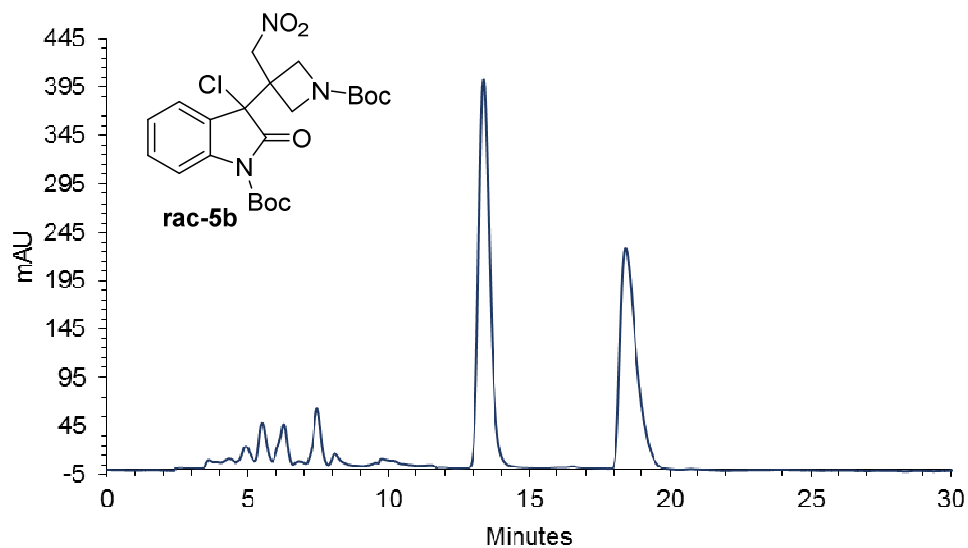

*N*-Boc-(*S*)-3-chloro-3-(*N*-Boc-3-(nitromethyl)azetidin-3-yl)-2-oxindole (**5b**)

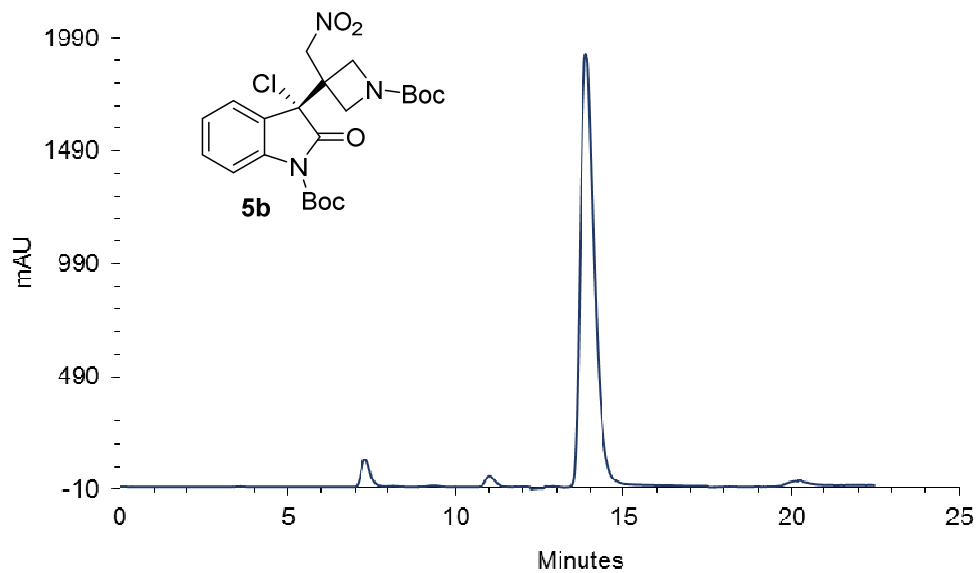

*N*-Boc-3-chloro-3-(*N*-Cbz-3-(nitromethyl)azetidin-3-yl)-2-oxindole (**rac-5c**)

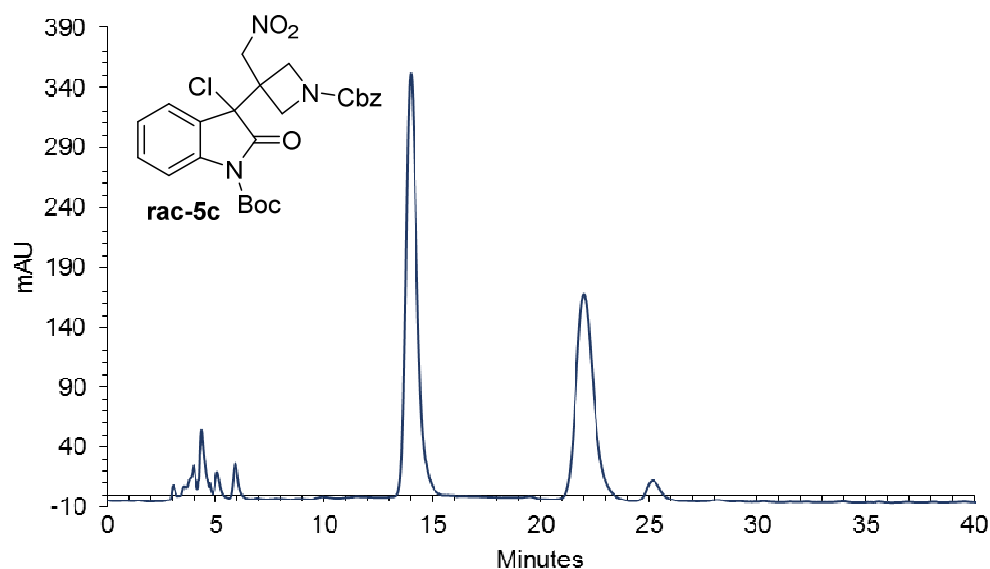

*N*-Boc-(*S*)-3-chloro-3-(*N*-Cbz-3-(nitromethyl)azetidin-3-yl)-2-oxindole (**5c**)

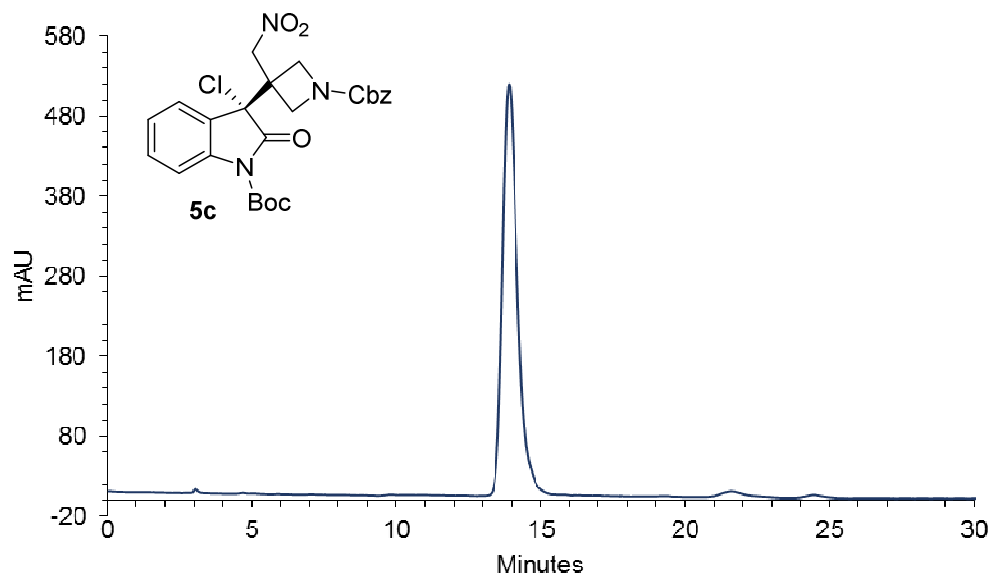

1-Fluoro-1-(3-(nitromethyl)oxetan-3-yl)-3,4-dihydronaphthalen-2(1H)-one (**rac-8a**)

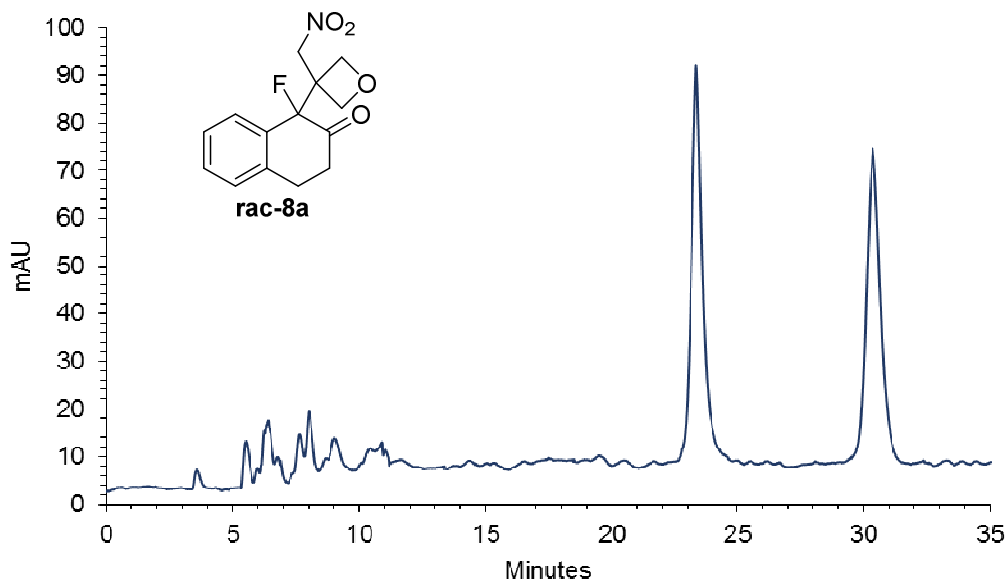

Signal 4: DAD1 D, Sig=221,4 Ref=550,100

| Ret. Time [min] | Area [mAU*s] | Area %  |
|-----------------|--------------|---------|
| 23.223          | 1273.43945   | 47.8612 |
| 30.346          | 1387.25184   | 52.1388 |

(*R*)-1-Fluoro-1-(3-(nitromethyl)oxetan-3-yl)-3,4-dihydronaphthalen-2(1H)-one (**8a**)

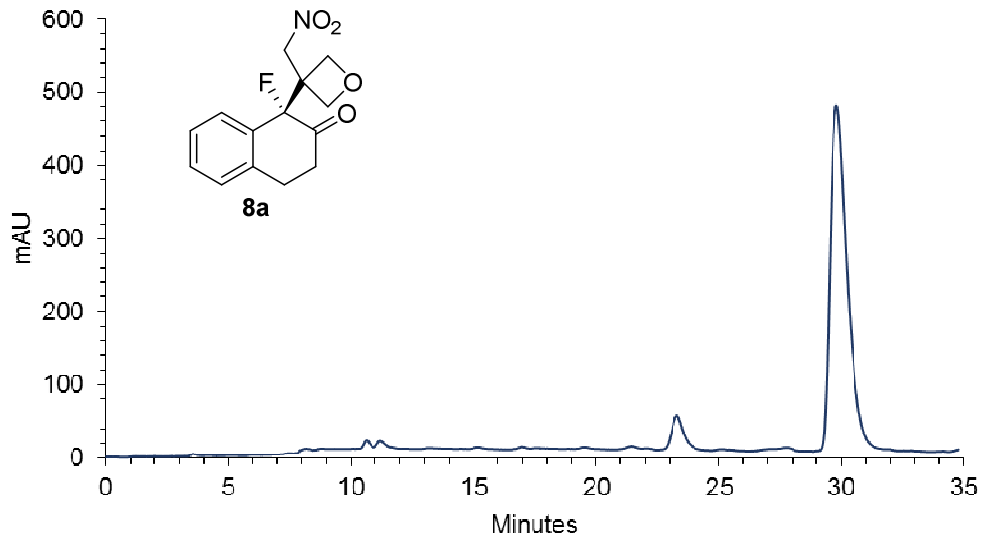

Signal 4: DAD1 D, Sig=221,4 Ref=550,100

| Ret. Time [min] | Area [mAU*s] | Area %  |
|-----------------|--------------|---------|
| 23.294          | 1335.05505   | 5.6591  |
| 29.798          | 2.22563E+04  | 94.3409 |

Ethyl 2-fluoro-2-(3-(nitromethyl)oxetan-3-yl)-3-oxo-3-phenylpropanoate (**rac-8b**)

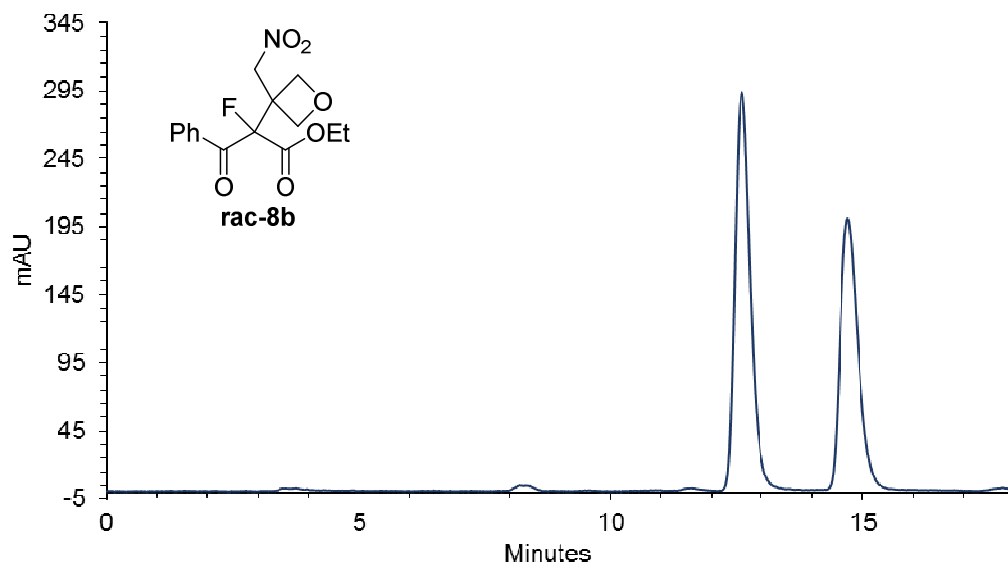

Signal 2: DAD1 B, Sig=230,4 Ref=550,100

| Ret. Time [min] | Area [mAU*s] | Area %  |
|-----------------|--------------|---------|
| 12.600          | 6279.61768   | 50.8086 |
| 14.702          | 6079.75244   | 49.1914 |

Ethyl (*R*)-2-fluoro-2-(3-(nitromethyl)oxetan-3-yl)-3-oxo-3-phenylpropanoate (**8b**)

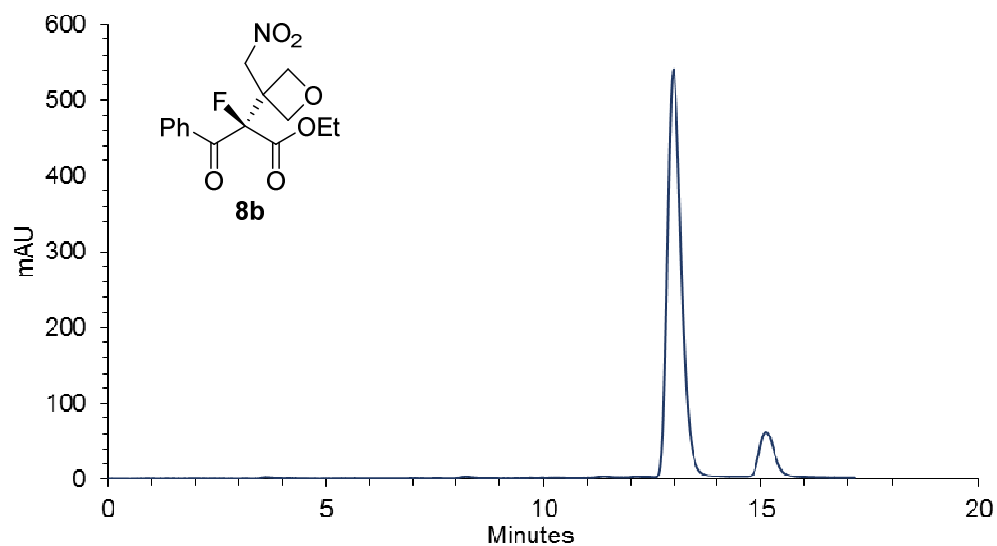

Signal 2: DAD1 B, Sig=230,4 Ref=550,100

| Ret. Time [min] | Area [mAU*s] | Area %  |
|-----------------|--------------|---------|
| 12.986          | 1.20336E+04  | 89.2595 |
| 15.113          | 1447.99487   | 10.7405 |

Ethyl (*R*)-2-fluoro-2-(*N*-Cbz-3-(nitromethyl)azetidin-3-yl)-3-oxo-3-phenylpropanoate (**8c**)

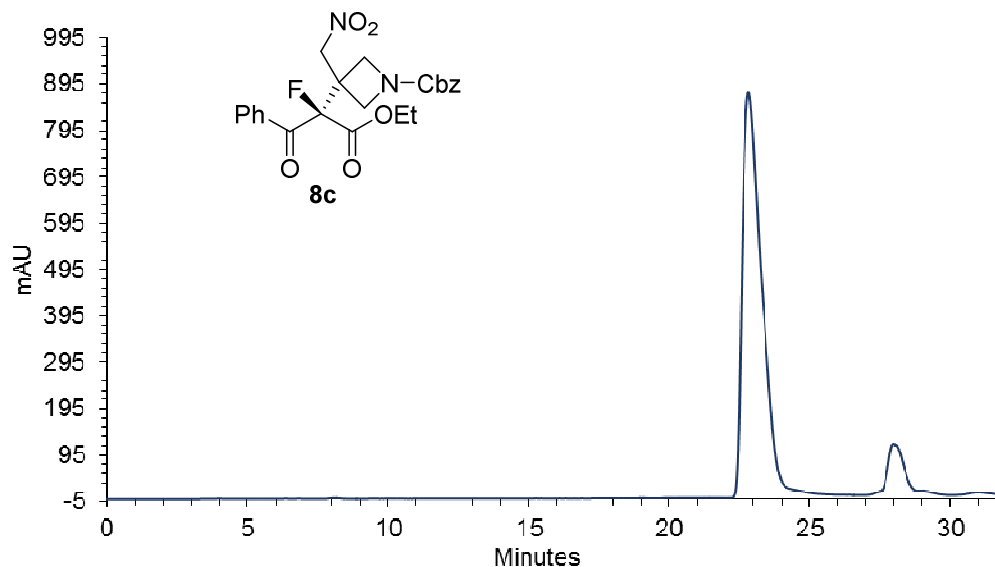

Signal 3: DAD1 C, Sig=243,4 Ref=550,100

| Ret. Time [min] | Area [mAU*s] | Area %  |
|-----------------|--------------|---------|
| 22.822          | 4.17577E+04  | 87.9253 |
| 28.035          | 6486.72754   | 12.0747 |

Ethyl 2-fluoro-2-(*N*-Boc-3-(nitromethyl)azetidin-3-yl)-3-oxo-3-phenylpropanoate (**rac-8d**)

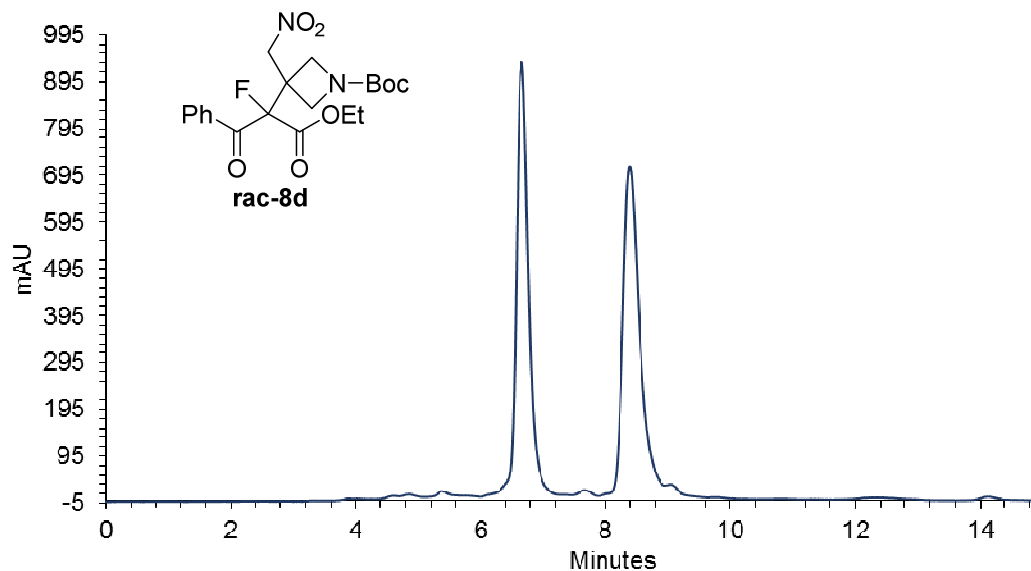

Signal 4: DAD1 D, Sig=221,4 Ref=550,100

| Ret. Time [min] | Area [mAU*s] | Area %  |
|-----------------|--------------|---------|
| 6.746           | 1.10441E+04  | 54.6594 |
| 8.425           | 9161.16602   | 45.3406 |

Ethyl (R)-2-fluoro-2-(N-Boc-3-(nitromethyl)azetidin-3-yl)-3-oxo-3-phenylpropanoate (**8d**)

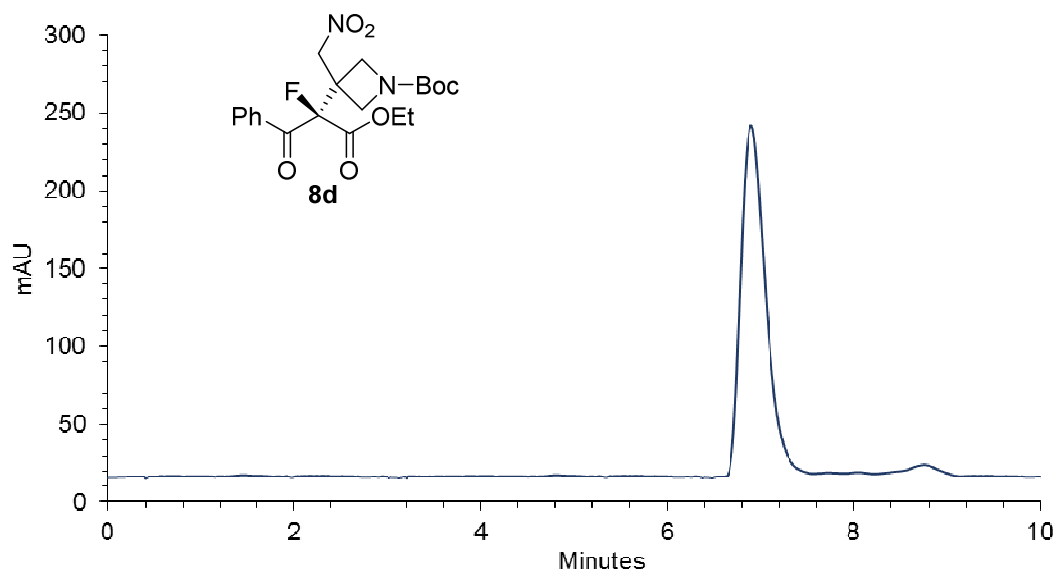

Signal 4: DAD1 D, Sig=221,4 Ref=550,100

| Ret. Time [min] | Area [mAU*s] | Area %  |
|-----------------|--------------|---------|
| 6.852           | 2.03128E+04  | 89.9897 |
| 8.789           | 2259.54761   | 10.0103 |

Methyl (R)-2-(2-((tert-butoxycarbonyl)amino)phenyl)-2-fluoro-2-(3 (nitromethyl)oxetan-3-yl)acetate (**9**)

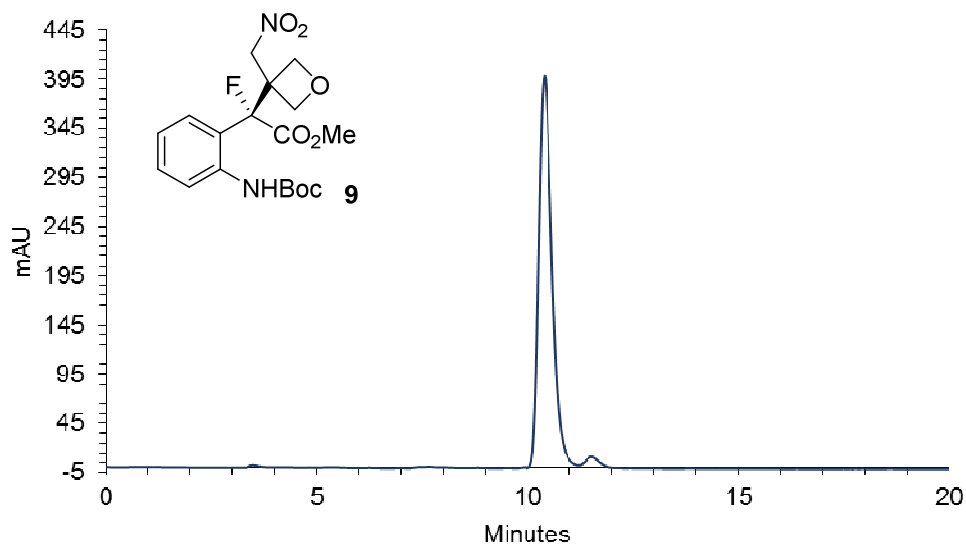

Signal 4: DAD1 D, Sig=221,4 Ref=550,100

| Ret. Time [min] | Area [mAU*s] | Area %  |
|-----------------|--------------|---------|
| 10.409          | 7706.35889   | 97.0787 |
| 11.528          | 231.90334    | 2.9213  |

Di-*tert*-butyl 3'-nitro-2''-oxodispiro[azetidine-3,1'-cyclopropane-2',3''-indoline]-1,1''-dicarboxylate (**rac-10**)

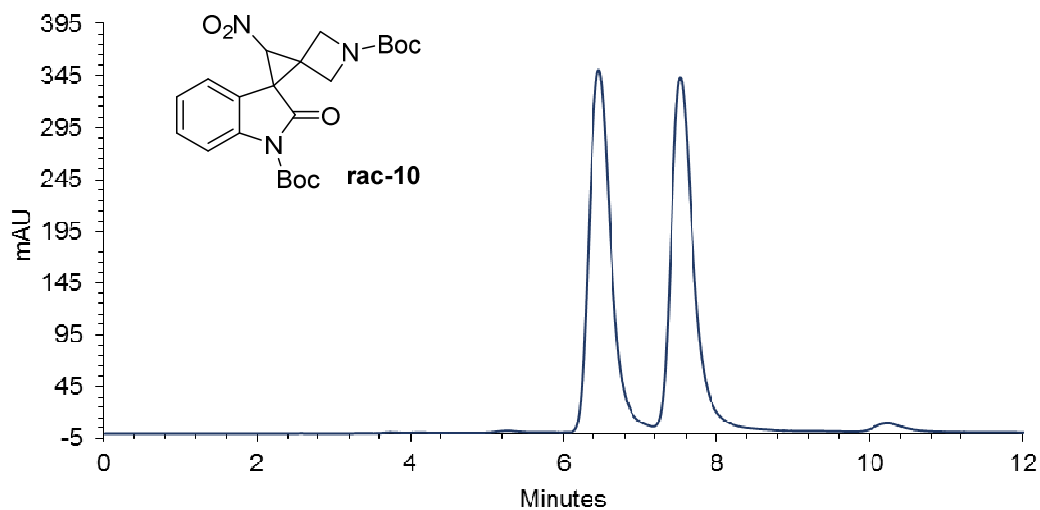

Di-*tert*-butyl (2*S*,3'*S*)-3'-nitro-2''-oxodispiro[azetidine-3,1'-cyclopropane-2',3''-indoline]-1,1''-dicarboxylate (**10**)

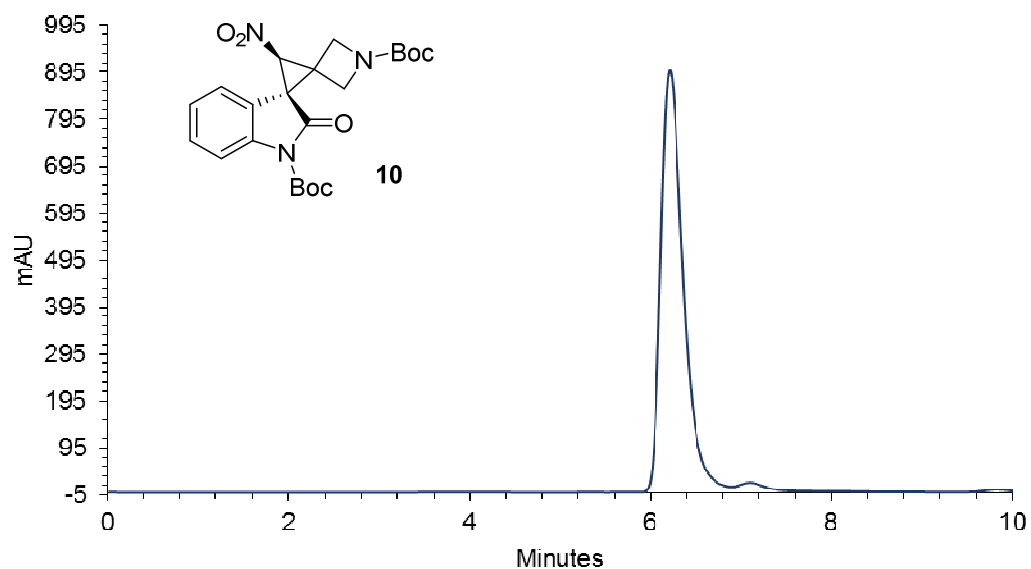



1-Benzyl 1''-(*tert*-butyl)-3'-nitro-2''-oxodispiro[azetidine-3,1'-cyclopropane-2',3''-indoline]-1,1''-dicarboxylate (**rac-11**)

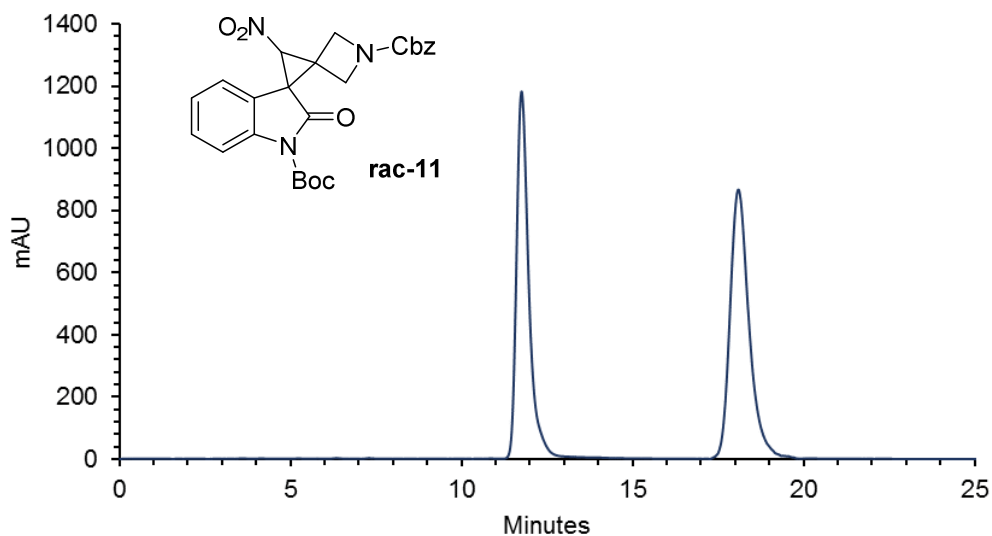

Signal 1: DAD1 A, Sig=245,4 Ref=550,100

| Ret. Time [min] | Area [mAU*s] | Area %  |
|-----------------|--------------|---------|
| 11.753          | 8224.5926    | 50.3007 |
| 18.122          | 8126.2694    | 49.6993 |

1-Benzyl 1''-(*tert*-butyl)-(2'*S*,3'*S*)-3'-nitro-2''-oxodispiro[azetidine-3,1'-cyclopropane-2',3''-indoline]-1,1''-dicarboxylate (**11**)

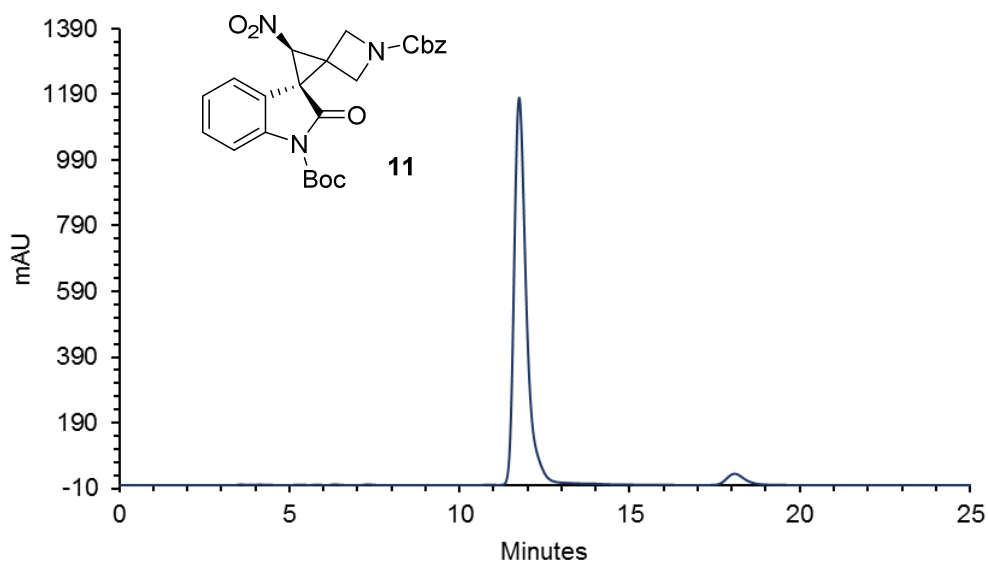

Signal 1: DAD1 A, Sig=245,4 Ref=550,100

| Ret. Time [min] | Area [mAU*s] | Area %  |
|-----------------|--------------|---------|
| 11.744          | 1.20180e4    | 97.3481 |
| 18.081          | 327.38605    | 2.6519  |

Ethyl (7S,8R)-6-ethyl-8-fluoro-7-phenyl-2-oxa-6-azaspiro[3.4]octane-8-carboxylate (**12**)

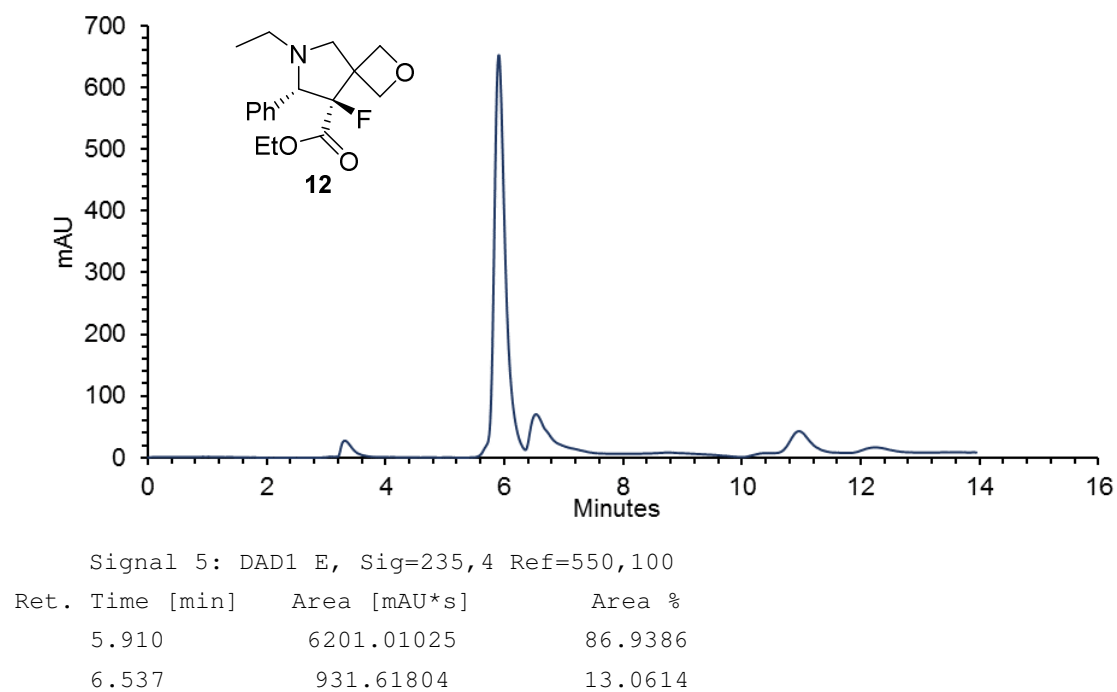

*tert*-Butyl (R)-3-((S)-1-(benzylthio)-3-hydroxy-2-(nitromethyl)propan-2-yl)-3-fluoro-2-oxindole-1-carboxylate (**13**)

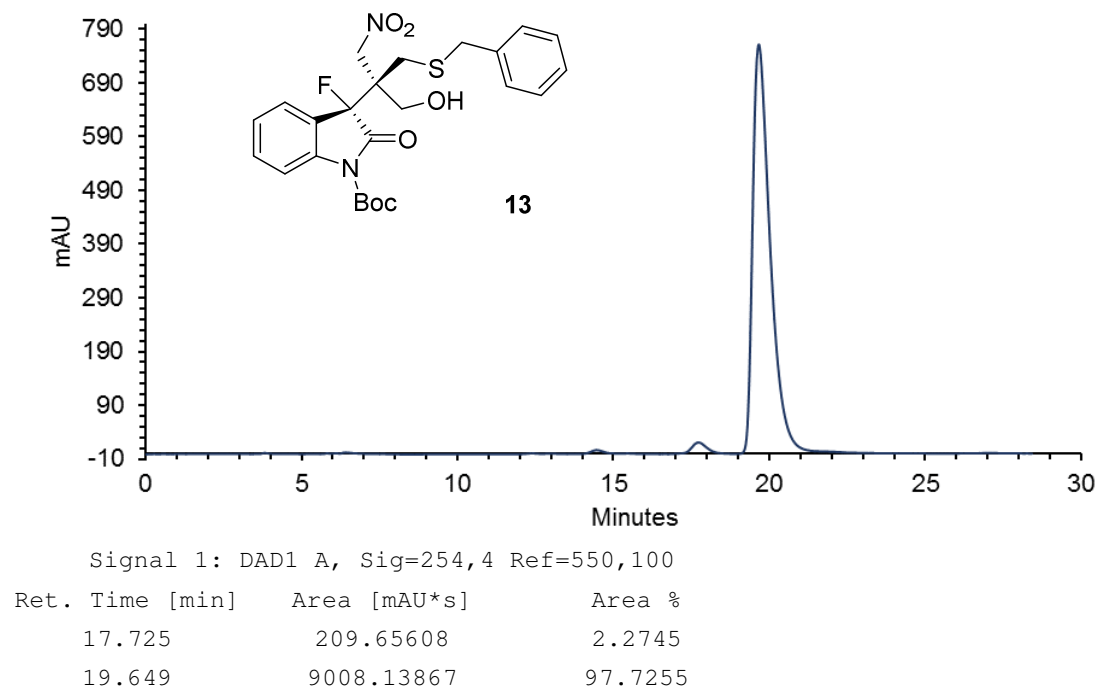

## 8. References

- 1 Ošek, M.; Noole, A.; Žari, S.; Öeren, M.; Järving, I.; Lopp, M.; Kanger, T. *Eur. J. Org. Chem.* **2014**, *17*, 3599–3606.
- 2 Xiao, J.-C.; Shreeve, J. M. *J. Fluorine Chem.* **2005**, *126*, 475–478.
- 3 Beadle, J. D.; Powell, N. H.; Raubo, P.; Clarkson, G. J.; Shipman, M. *Synlett*, **2016**, *27*, 169–172.
- 4 Potter, T. J.; Kamber, D. N.; Mercado, B. Q.; Ellman, J. A. *ACS Catal.*, **2017**, *7* (1), 150–153.
- 5 Okino, T.; Hoashi, Y.; Furukawa, T.; Xu, X.; Takemoto, Y. *J. Am. Chem. Soc.* **2005**, *127*, 119–125.
- 6 Bae, H. Y.; Some, S.; Lee, Jae H.; Kim, J.-Y.; Song, M. J.; Lee, S.; Zhang, Y. J.; Song, C. E. *Adv. Synth. Catal.* **2011**, *353*, 3196–3202.
- 7 Qian, Y.; Ma, G.; Lv, A.; Zhu, H.-L.; Zhao, J.; Rawal, V. H. *Chem. Commun.* **2010**, *46*, 3004–3006.
- 8 Baran, R.; Veverková, E.; Škvorcova, A.; Šebesta, R. *Org. Biomol. Chem.* **2013**, *11*, 7705–7711.
- 9 Synthesized following the procedure: Puglisi, A.; Benaglia, M.; Annunziata, R.; Rossi, D. *Tetrahedron: Asymmetry* **2008**, *19*, 2258–2264.
- 10 Dou, X.; Lu, Y. *Org. Biomol. Chem.* **2013**, *11*, 5217–5221.
- 11 Adapted from: Han, X.; Luo, J.; Liu, C.; Lu, Y. *Chem. Commun.* **2009**, 2044–2046.
